# **Title: Proteomic Architecture of Human Coronary and Aortic Atherosclerosis**

## **Authors:**

**Herrington David M<sup>1\*</sup>, Mao Chunhong<sup>2</sup>, Parker Sarah<sup>3</sup>, Fu Zongming<sup>4</sup>, Yu Guoqiang<sup>5</sup>, Chen Lulu<sup>5</sup>, Venkatraman Vidya<sup>3</sup>, Fu Yi<sup>5</sup>, Wang Yizhi<sup>5</sup>, Howard Tim<sup>6</sup>, Goo Jun<sup>7</sup>, Zhao CF<sup>1</sup>, Liu Yongming<sup>8</sup>, Saylor Georgia<sup>1</sup>, Athas Grace<sup>9</sup>, Troxclair Dana<sup>9</sup>, Hixson James<sup>7\*</sup>, Vander Heide Richard<sup>9\*</sup>, Wang Yue<sup>4\*</sup>, Van Eyk Jennifer<sup>3\*</sup>**

## **Affiliations:**

<sup>1</sup>Section on Cardiovascular Medicine, Dept. of Medicine, Wake Forest School of Medicine; Winston Salem NC 27157 USA

<sup>2</sup>Virginia Bioinformatics Institute, Virginia Tech, Blacksburg, VA 24061, USA

<sup>3</sup>Advanced Clinical Biosystems Research Institute, The Heart Institute, and Department of Medicine, Cedars-Sinai Medical Center, Los Angeles, California 90048, USA

<sup>4</sup>Johns Hopkins Medical Institute, Baltimore MD 21287 USA

<sup>5</sup>Department of Electrical and Computer Engineering, Virginia Polytechnic Institute and State University, Arlington, VA 22203, USA

<sup>6</sup>Center for Genomics and Personalized Medicine Research, Wake Forest School of Medicine; Winston Salem NC 27157 USA

<sup>7</sup>Department of Epidemiology, Human Genetics and Environmental Sciences, Human Genetics Centre, School of Public Health, University of Texas Health Science Center at Houston, Houston Tx 77225 USA

<sup>8</sup>Department of Epidemiology, Division of Public Health Sciences, Wake Forest School of Medicine; Winston Salem NC 27157 USA

<sup>9</sup>Department of Pathology, Louisiana State Health Science Center, New Orleans, Louisiana 70112 USA

\* Co-senior author

## **Corresponding Author Information:**

David Herrington, MD, MHS, Dalton McMichael Chair in Cardiovascular Medicine  
Department of Internal Medicine  
Medical Center Boulevard \ Winston-Salem, NC 27157  
336.716.4950 (office), dherring@wakehealth.edu

## Summary

The inability to detect premature atherosclerosis significantly hinders implementation of personalized therapy to prevent coronary heart disease. A comprehensive understanding of arterial protein networks and how they change in early atherosclerosis could identify new biomarkers for disease detection and improved therapeutic targets. Here we describe the human arterial proteome and the proteomic features strongly associated with early atherosclerosis based on mass-spectrometry analysis of coronary artery and aortic specimens from 100 autopsied young adults (200 arterial specimens). Convex analysis of mixtures, differential dependent network modeling and bioinformatic analyses defined the composition, network re-wiring and likely regulatory features of the protein networks associated with early atherosclerosis. Among other things the results reveal major differences in mitochondrial protein mass between the coronary artery and distal aorta in both normal and atherosclerotic samples – highlighting the importance of anatomic specificity and dynamic network structures in the study of arterial proteomics. The publicly available data resource and the description of the analysis pipeline establish a new foundation for understanding the proteomic architecture of atherosclerosis and provide a template for similar investigations of other chronic diseases characterized by multi-cellular tissue phenotypes.

## Keywords

Proteomics, human atherosclerosis, mass-spectrometry, network modelling, coronary artery, aorta

## Highlights

- LC MS/MS analysis performed on 200 human aortic or coronary artery samples
- Numerous proteins, networks, and regulatory pathways associated with early atherosclerosis
- Mitochondrial proteins mass and selected metabolic regulatory pathways vary dramatically by disease status and anatomic location
- Publically available data resource and analytic pipeline are provided or described in detail

## Introduction

At the molecular level atherosclerosis can be defined as an assembly of hundreds of intra- and extra-cellular proteins that jointly alter cellular processes and produce characteristic remodeling of the local vascular environment. Ultimately, these proteomic changes produce the lesions responsible for most ischemic cardiovascular events. Unfortunately, current methods to treat and prevent cardiovascular disease focus on antecedent risk factors that are not deterministic of these changes, or on anatomic manifestations of disease that are only evident long after these proteomic changes are underway. To improve early disease detection, and to interrupt the disease process before clinical consequences occur, it is necessary to recognize and understand the specific patterns and dynamic features of arterial protein networks that constitute the molecular signatures of healthy and atherosclerotic arterial tissues.

Previous studies have described features of the arterial proteome in murine<sup>1-3</sup> and cell models of atherosclerosis<sup>4,5</sup> and in limited numbers of human arterial samples with and without atherosclerosis<sup>6-18</sup>. To date there has not been a comprehensive survey of the human arterial proteome based on a large number of human coronary and aortic samples, using contemporary LC-MS/MS technology and subsequent identification of the proteins that signify presence of pre-clinical atherosclerosis. Accordingly, we established a tissue acquisition, mass-spectrometry analysis and statistical and bioinformatic pipeline to characterize the human coronary and distal aortic arterial proteome and to identify those proteins, networks and pathways most strongly associated with early atherosclerotic lesions. Detailed analyses of the detected proteins reveal several key features of the coronary and aortic proteome in health and disease as outlined below, and demonstrate how the data resource may be used to guide more targeted functional research concerning the proteomics of early atherosclerosis.

## Results

### **Global Analysis of Coronary and Abdominal Aortic Proteomes Identifies Novel Arterial Proteins and Scale-Free Network Topologies**

Based on stringent quality control and calling criteria a total of 1925 unambiguous protein groups (hereinafter referred to as “proteins”) were identified in one or more left anterior descending (LAD) or distal abdominal aorta (AA) samples, including 974 proteins present in 50% or more of the LAD or AA samples (**Supplementary**

**Table 1**). The 974 proteins represent a wide range of biological processes, molecular functions, cellular components and canonical pathways<sup>19</sup> (**Supplemental Figs. 1a-c and Supplemental Tables 2-5**). Of the 1925 proteins, 274 have not been previously described in twelve prior studies that directly analyzed protein content of human arterial tissues (**Supplemental Table 1**); including 52 proteins present in more than 50% of either the LAD or AA samples. (All but one of these 52 proteins were, nevertheless, predicted based on RNASeq analysis of human coronary and aortic transcriptional databases (GTEx)).

The 944 unique proteins identified in the LAD exhibited a scale-free network topology typically seen in complex adaptive networks of molecular or cellular constituents from a variety of living organisms<sup>20-22</sup> (**Fig. 1**). Furthermore, these proteins included several distinct and reproducible co-expression modules that roughly correlated with specific cellular functions and locations such as mitochondrial proteins involved with cellular respiration (Red module), nuclear proteins involved with chromatin assembly and organization (Turquoise module), and extra cellular matrix proteins (Brown module). A similar scale-free topology and functional modular structure was also evident in the protein data from the AA (**Supplemental Fig. 2**.) A scale-free topology suggests that the arterial proteome may arise from a complex adaptive system with properties such as self-organized criticality, emergence, and resilience.<sup>21,23,24</sup> Complex adaptive systems such as this are uniquely well-suited for description using graph theory and network or non-linear dynamic modelling to reveal functional insights that may be less evident from more conventional linear conceptual models and methods<sup>25-27</sup>

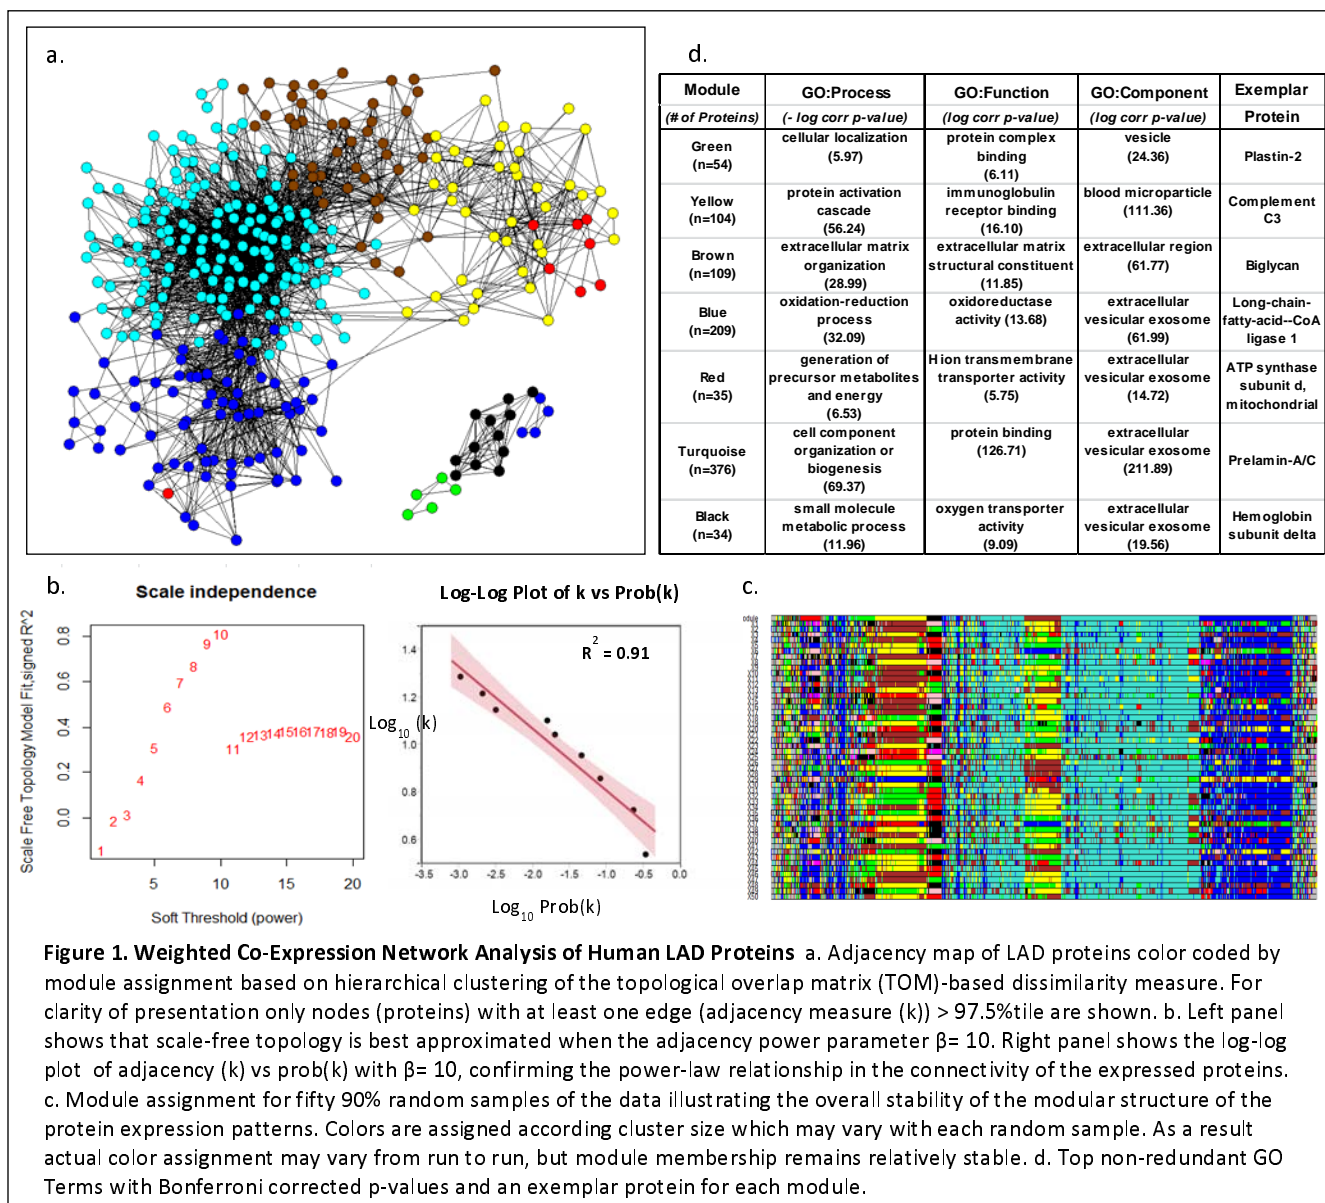

## Comparison of Normal Coronary and Aortic Proteomes Reveal Significant Differences in Mitochondrial Protein Mass

Several hundred proteins were detected in the LAD but not in the AA samples (**Supplemental Figure 3**). This pattern was observed when limiting the analysis to completely normal samples ( $n=30$  in each territory) or when limiting the proteins to those present in  $\geq 50\%$  of the LAD and/or AA samples. GO term analysis of the proteins exclusively detected in the LAD indicated significant enrichment of mitochondrial proteins (p-value range  $1.7 \times 10^{-6}$  to  $1.8 \times 10^{-28}$ ).

To confirm this apparent differential abundance of mitochondrial proteins between LAD and AA samples we performed a more sensitive data independent acquisition MS (SWATH) analysis of entirely normal samples (n=30 in each location), focusing on n=114 mitochondrial proteins involved with fatty acid metabolism, oxidative phosphorylation, TCA cycle and mitochondrial biogenesis. To account for possible site and sample differences in cellular material or protein extraction yields the quantitative results were adjusted for several housekeeping proteins, a smooth muscle cell specific marker protein and age and sex of the autopsied cases. Overall, mitochondrial proteins were 1.98-fold more abundant in the LAD compared with the AA ( $p<0.001$ ) including a 2.25 fold increase in oxidative phosphorylation proteins ( $p<0.001$ ) and an isolated >10-fold excess of inorganic pyrophosphatase ( $p<0.001$ ; **Figure 2**). A similar comparison of extracellular matrix proteins revealed only a small, albeit statistically significant ( $p=0.01$ ) 6% excess in ECM proteins in the AA samples compared with the LAD (**Supplemental Figure 4**). (A notable exception was tenascin which had a >10-fold excess in AA samples compared with LAD ( $p<0.0001$ ).)

## LAD vs AA Signed Fold-Difference (LAD/AA): Mitochondrial Proteins

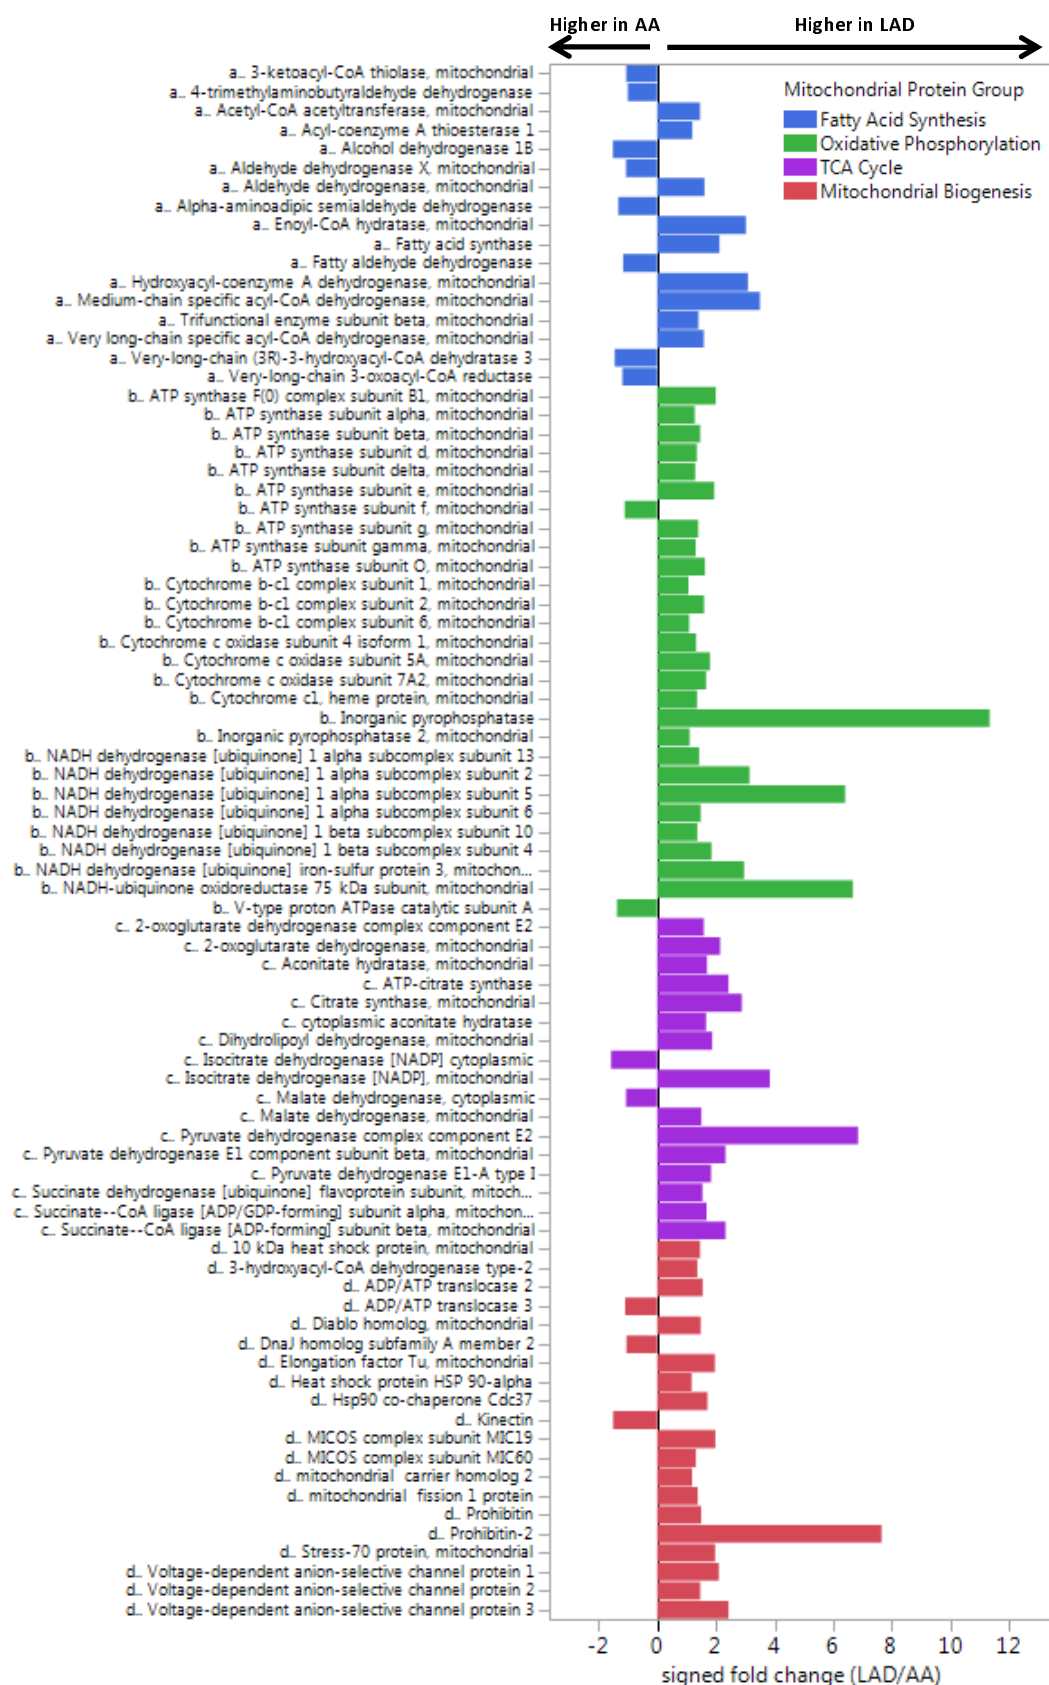

**Figure 2. Comparison of Mitochondrial Proteins in Normal LAD and AA Samples.** Data independent MS (SWATH) analysis of completely normal LAD and AA samples (n=30 from each anatomic location) with adjustment for age, sex, MYH11, RABA7A, TERA, G6PI. LAD vs AA MANOVA p-values by proteins class: fatty acid metabolism,  $p = 0.04$ , oxidative phosphorylation  $p < 0.0001$ , TCA  $p < 0.0001$ , mitochondrial biogenesis  $p < 0.0001$ .



These data suggest fundamental differences in mitochondrial mass and potential aerobic capacity between LAD and AA tissues, possibly reflecting the differing energy requirements of these two arterial tissue types. This is exemplified by the dramatic excess of inorganic pyrophosphatase in the LAD compared to the aorta suggesting enhanced capacity to initiate fatty acid oxidation. This heterogeneity in the proteomic profile of two arterial tissues emphasize the need for arterial anatomic specificity when characterizing the proteomics and functional biology of arterial tissues – especially if considering mechanisms or interventions that involve metabolic pathways (see below)

**Atherosclerotic tissues in both the LAD and AA present a proteomic profile consistent with TNF activation; however, the LAD also provides evidence of inhibition of PPAR- $\alpha$ , PPAR- $\gamma$ , and insulin receptor regulated proteins, a pattern that is not evident in the AA.**

To define the proteomic profile of early atherosclerosis two complementary phenotyping strategies were used. First, each sample was graded by a vascular histopathologist according to %surface area involvement of normal intima (NL), fatty streak (FS) or fibrous plaque (FP). Extensive regression analyses (MANOVA, GLM, Ordinal Regression, Elastic Net) were performed to identify proteins individually or jointly associated with %FP in the LAD and AA samples (**Supplemental Tables 6-7, Supplemental Figure 5**). The internal validity of these data is evidenced by the presence and consistency across anatomic locations of several known protein markers of atherosclerosis from model systems among the top hits (e.g. Apo B-100, Ig mu chain C, CD5 antigen-like, Plastin-2, Tenascin, Thrombospondin-1, Cathepsin B, and Vitronectin.)<sup>1</sup>

Separately, convex analysis of mixtures<sup>22</sup> (CAM) was used to de-convolve the global protein profiles from individual samples into data-derived tissue phenotypes and to identify marker proteins associated with each data-derived tissue phenotype (**LAD: Figure 3, AA: Supplemental Figure 6**). This approach has the advantage of incorporating information about tissue phenotype from the global protein profiles that is independent of the pathologist visual inspection of the arterial samples. The data-derived tissue phenotypes, and associated FP marker proteins roughly correlated with results based on pathologic assessment of extent of disease, but retained sufficient variation from pathology based results to suggest complementary information was present (**Supplemental Figure 7**).



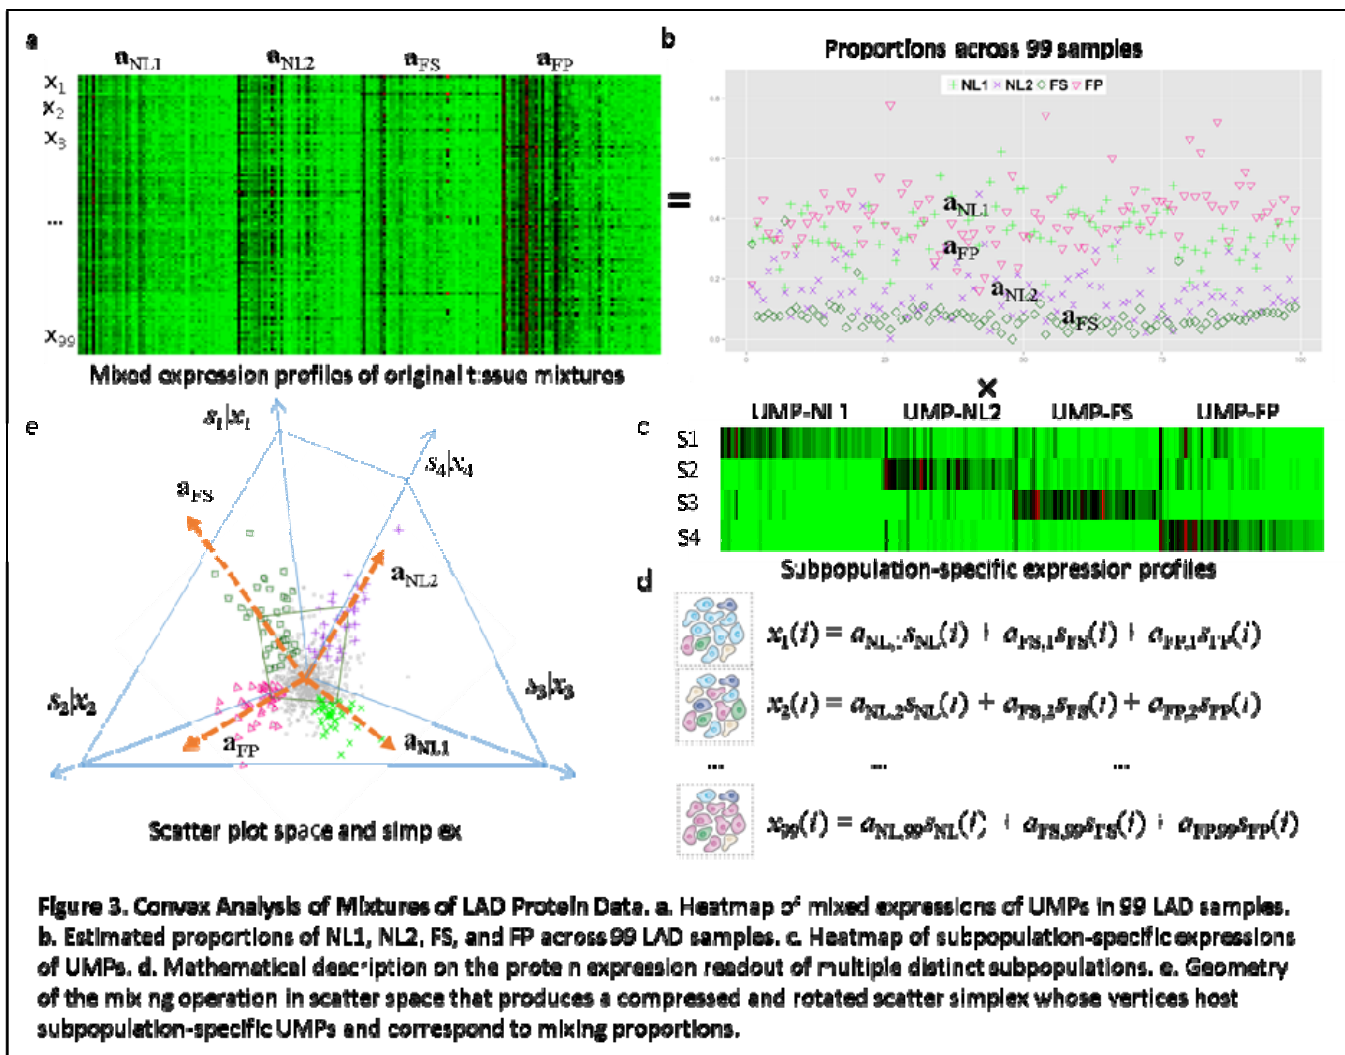

To take full advantage of both phenotyping strategies we used principal component analysis and hierarchical clustering of the pathologist- and CAM-derived phenotype data to produce a patho-proteomic classification for each LAD sample (Fig. 4). The clusters at the extremes of the first principle component identified samples highly enriched with FP or NL tissue (FP: n=15; NL: n=30) with little or no confounding from fatty streaks from either a gross pathology or global proteomic perspective. Comparing these FP and NL enriched samples identified eighty-nine (n=89) individual proteins with  $\geq$  (+/-) 1.7 fold-difference and a t-test q-value of  $\leq 0.05$  for FP vs NL (Supplemental Tables 8 and 9). Bioinformatic functional analysis of these atherosclerosis associated proteins revealed a pattern consistent with activation of the TNF- $\alpha$  pathway ( $p=2.64E-07$ ), but also inhibition of insulin receptor, PPAR- $\alpha$  and PPAR- $\gamma$  pathways ( $p=4.22E-10$ ,  $2.42E-13$ ,  $8.56E-16$  respectively) (Fig. 4, Supplemental Table 10). A similar analysis of the atherosclerosis proteins in the AA samples (FP: n=9, NL: N= 18) confirmed a core group of n=19 early atherosclerosis-associated proteins that were shared

across both anatomic territories (**Supplemental Table 11-13**) and also produced a pattern consistent with TNF activation similar to the LAD ( $p=1.92E-05$ ). However, in the AA sample proteomes there was no evidence of inhibition of the insulin receptor, PPAR- $\alpha$  or PPAR- $\gamma$  pathways (**Supplemental Tables 10**).

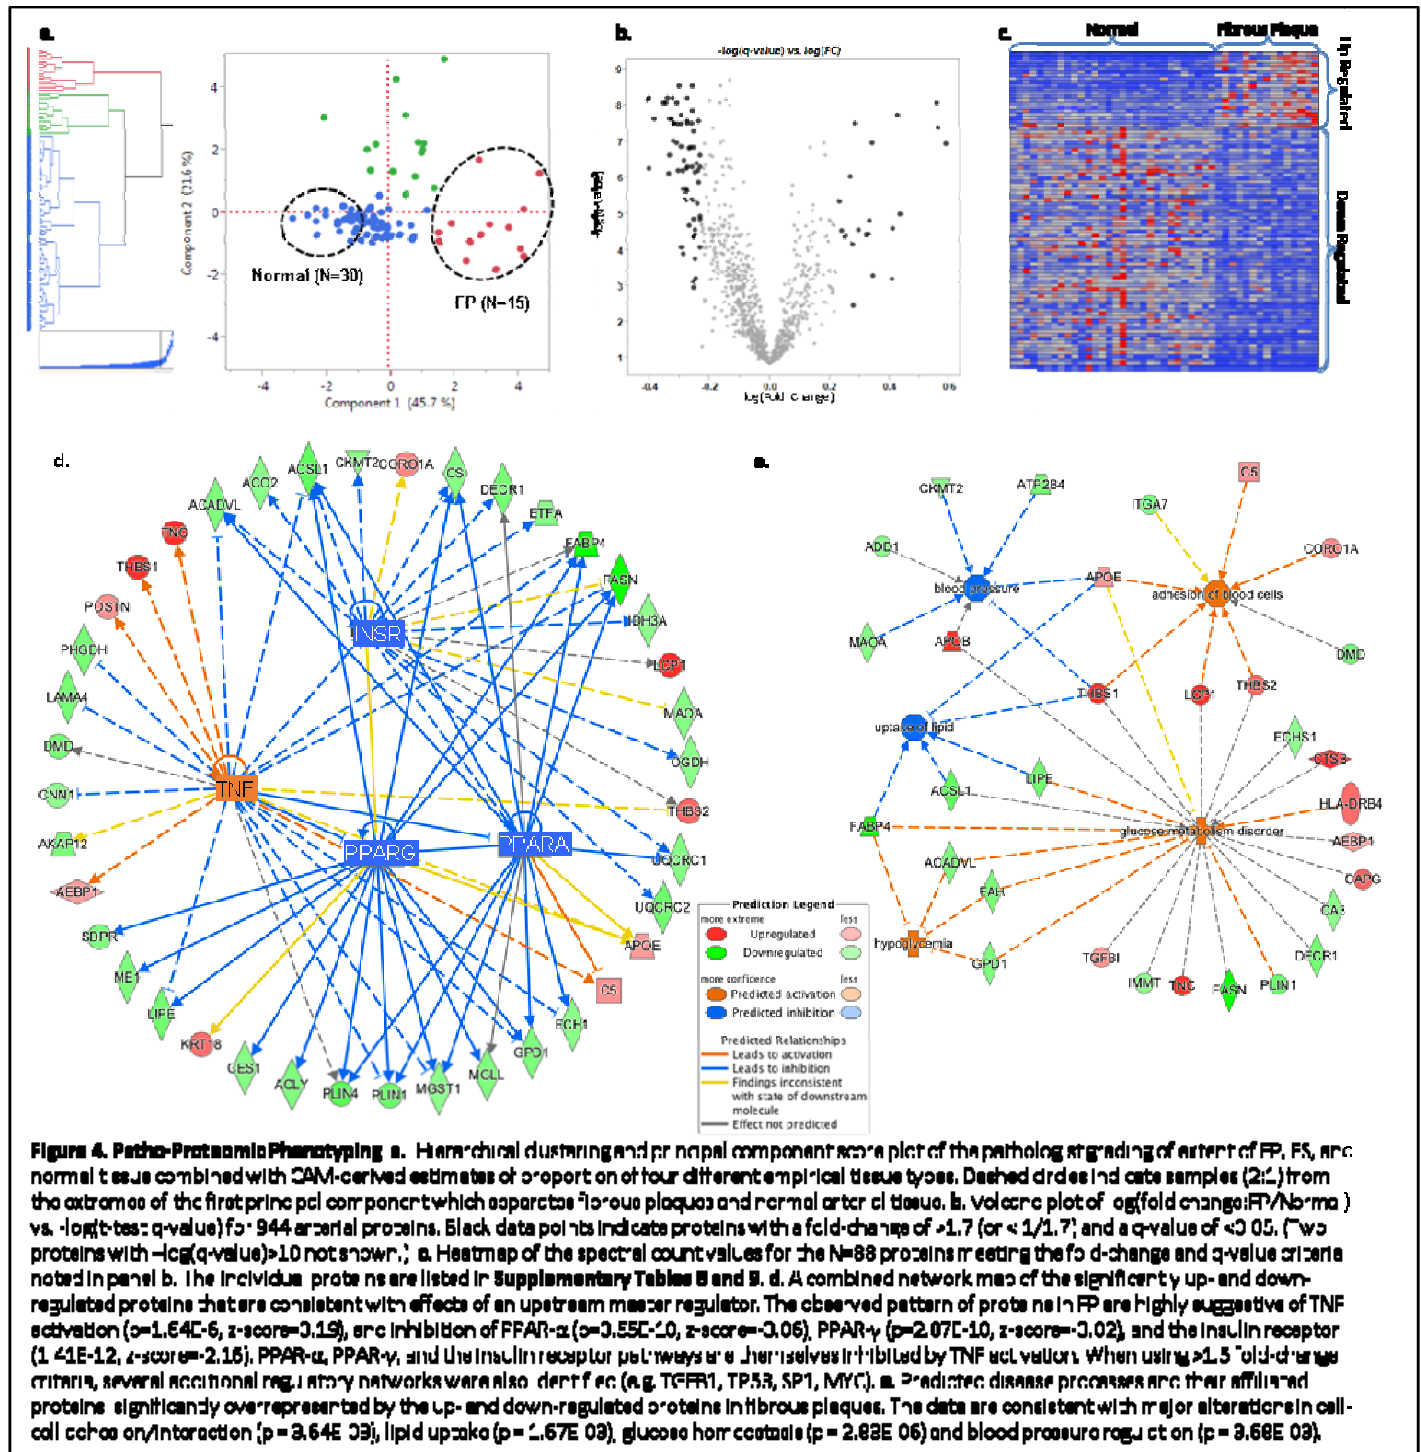

**Differential network analysis of coronary and aortic proteomes indicate divergent mitochondrial dynamics in the setting of atherosclerosis characterized by reduced mitochondrial mass in coronary arteries that is not evident in in the distal abdominal aorta.**

An important feature of complex adaptive systems is the potential for network topologies to change under different conditions. Accordingly, we used differential dependent network (DDN) analysis of the FP-associated proteins identified above to select proteins that were pivotal in the re-wiring of the network structure between NL and FP in the LAD samples (**Figure 5**). Analysis of n=26 re-wiring hub proteins revealed significant enrichment of TCA proteins ( $p=4.8 \times 10^{-6}$ ). Subsequent analysis of individual TCA proteins documented an average 60% reduction in TCA proteins in FP enriched samples vs. NL.

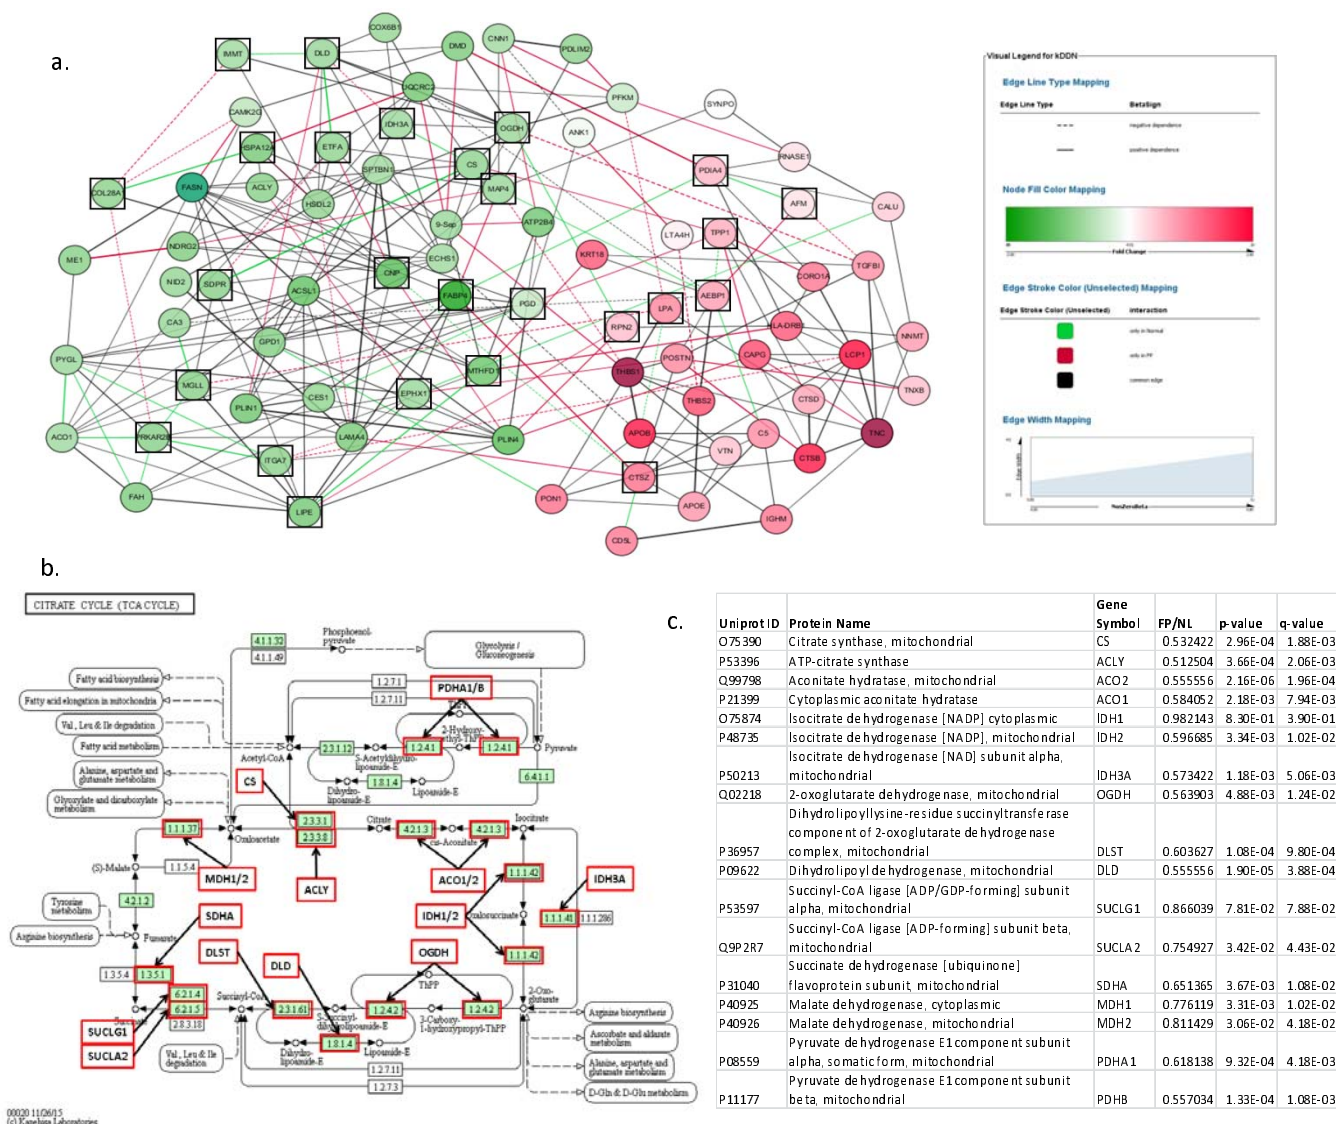

**Figure 5 Differential Network Analysis of FP Associated Proteins in the LAD** **a.** Plot depicts the re-wiring of protein networks between FP and NL samples. Green nodes are up-regulated and red nodes are down-regulated in FP samples. Green edges indicate significant correlation in normal samples not present in FP samples. Red edges indicate significant correlation in FP samples not present in normal samples. Black squares indicate differential network “hub proteins” (ie. proteins with different couplings to network partners in both FP and NL samples). Go term analysis of the differential network hub proteins indicated significant enrichment of TCA proteins ( $p=4.8 \times 10^{-6}$ ). **b.** TCA cycle proteins with MS data available for additional analysis. Every protein indicated by a red box was quantitatively lower in FP samples after adjustment for housekeeping proteins, age and sex. **c.** Statistical comparison of TCA proteins in FP vs NL LAD samples.

To confirm and extend this observation, SWATH analysis of a broad-based panel of  $n=114$  mitochondrial proteins was performed comparing FP vs NL in the LAD (**Figure 6**). The results documented a consistent reduction of a wide range of mitochondrial proteins in the FP samples compared to NL samples after adjustment for housekeeping and vascular smooth muscle cell marker proteins, age and sex. In contrast, a similar analysis of the same proteins in AA samples revealed a much less consistent and non-statistically

significant pattern of mitochondrial protein suppression. To determine if this was a mitochondrial specific phenomenon we also performed targeted SWATH analysis of a panel of ECM proteins (n=77) and found a modest atherosclerosis-associated increase of ECM proteins in both territories (LAD mean fold-increase = 1.25, MANOVA p-value= 0.02; AA mean fold increase = 1.78 fold increase, p-value = 0.017); although there were specific examples of anatomic discordance that deserve further study (e.g. laminins and nidogens) **(Supplemental Figure 8)**.



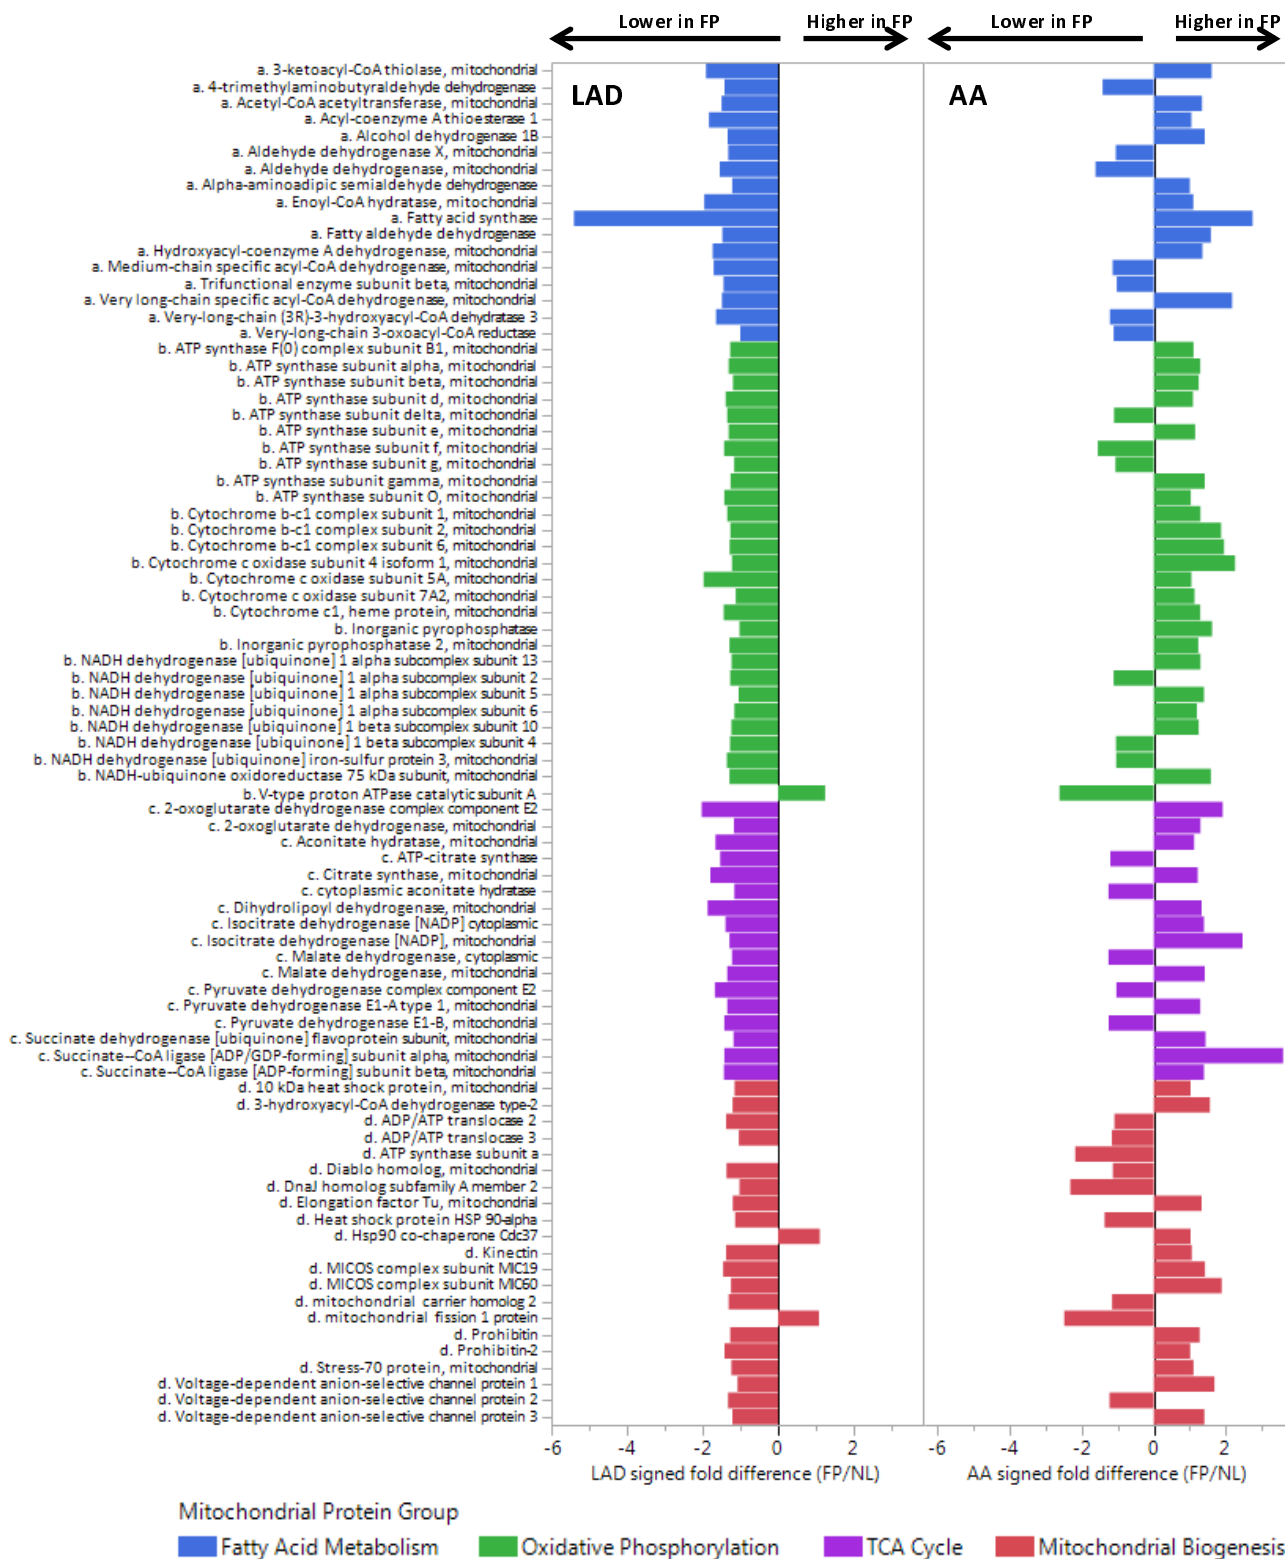

**Figure 6. Comparison of Mitochondrial Proteins in FP vs NL Samples from the LAD and AA Data independent acquisition (SWATH) analysis was used to compare a targeted set of mitochondrial proteins in n=15 FP and n=30 NL LAD samples after adjustment for age, sex, MYH11, RABA7A, TERA, G6PI. Histogram bars indicate relative difference between FP and NL samples in each anatomic location. LAD MANOVA p-value for each mitochondrial protein group:  $p < 0.0001$  for each group; AA MANOVA p-values for each mitochondrial protein group:  $p = \text{n.s.}$  for each group.**

## Discussion

The results here provide a comprehensive survey of human coronary and aortic proteins and identify individual proteins, protein networks and regulatory pathways indicative of early atherosclerosis. These data can be distinguished from prior work because of the number and diversity of proteins identified, the fact that these proteins were obtained from a large number of human coronary and aortic arterial samples where the effects of local tissue context, natural variation in human subjects, and a range of arterial tissue phenotypes from normal to early atherosclerosis are manifest. Several analytic methods were used to illuminate complex networks involving many proteins that jointly signify arterial health and disease. Importantly, the publicly accessible data generated by this work, and the analytic methods depicted here represent foundational resources that could lead to a wide range of future research concerning human arterial protein biology.

There are several notable findings among the many results reported here. First, the human arterial proteome exhibits features consistent with a complex adaptive network, reiterating the concept that complex adaptive networks are an overarching organizational feature common to many biologic systems<sup>28</sup>. Looking at the arterial proteome through the lens of complexity theory including concepts such a scale-invariance (as documented here), self-organized criticality, emergence, and resiliency<sup>21,23,24</sup> may produce insights that have escaped more narrowly focused investigations of a smaller number of proteins or a more linear and deterministic framework. The differential dependent networks presented here emphasize this point by defining dynamic features of complex protein networks that signify normal versus atherosclerotic arteries and using key elements of these dynamic networks to discover important aspects of the proteome in atherosclerosis that were not initially evident by other means.

Second, the data document significant anatomic variation in the abundance of mitochondrial proteins in normal arterial samples, suggesting that coronary arteries likely have considerably greater aerobic capacity than the distal aorta. This fits our understanding of the different embryology<sup>28</sup> and normal physiologic roles of these distinct regions of the arterial system with the coronary arteries having greater energy requirements associated with regulation of coronary blood flow compared to the distal aorta which serves primarily as passive conduit for blood delivery to the lower extremities. To our knowledge this substantial variation in mitochondrial protein mass between coronary and aortic tissues in humans has not been previously documented.



Third, the data indicate profound anatomic differences in key metabolic regulatory pathways and mitochondrial dynamics in the setting of atherosclerosis. Specifically, the data reveal a broad-based reduction of mitochondrial protein mass and a proteomic pattern consistent with inhibition of PPAR- $\alpha$ , PPAR- $\gamma$ , and insulin receptor regulated pathways in atherosclerotic coronary arteries, but not in similarly diseased distal abdominal aortic samples. These provide critical anatomic specificity to the growing body of evidence that mitochondrial dysfunction and altered mitochondrial dynamics are also central features of atherosclerosis<sup>29 15 30</sup>, and may provide a mechanistic framework to explain the anatomic dimorphism between coronary and peripheral arterial disease with respect to conventional and genetic risk factors for atherosclerosis<sup>31,32</sup>. It remains to be determined whether the reduction in mitochondrial protein mass in coronary atherosclerosis is a consequence of oxidative, or Ca<sup>++</sup>-mediated mitochondrial damage and mitophagy or impaired mitochondrial biogenesis, or both. It is interesting to note that the concurrent increases in the lysosomal proteases cathepsin B, D and Z in the atherosclerotic samples may signify enhanced lysosomal biogenesis useful for targeted degradation of damaged mitochondria<sup>29</sup>.

The data also reassuringly highlight numerous individual proteins and a global proteomic pattern of TNF activation in the FP samples consistent with several decades of research documenting the role of inflammation in the pathogenesis of atherosclerosis.<sup>33</sup> However, even the more familiar indicators of TNF activation and inflammation exhibited substantial anatomic variation from LAD to distal aorta in our data, an observation that was made possible by the extended proteomic depth of coverage in the current study.

Recognizing the anatomic heterogeneity with respect to metabolic enzyme profiles and mitochondrial function has important implications for research on arterial health and disease. Many of the pathogenic mechanisms and targeted therapies for atherosclerosis are directly related to fatty acid metabolism or aerobic energy biosynthesis and redox homeostasis<sup>34</sup>. Unfortunately, a great deal of our understanding of arterial biology has been generated without regard to anatomic distribution. For instance many animal models of atherosclerosis rely on aortic, femoral or carotid manifestations of disease with the assumption that findings are generalizable to human coronary arteries. Likewise the overwhelming majority of contemporary human arterial proteomic data have been generated from carotid arteries – typically severely diseased endarterectomy specimens. The current data suggest that a complete understanding of the pathogenesis and prevention of human coronary

artery atherosclerosis, especially as it relates to metabolic mechanisms and mitochondrial function, may require more anatomically specific methods of interrogation. It is also interesting to consider whether anatomic variations in the arterial proteome may be illuminating about other forms of arterial disease that have distinct anatomic distributional features (e.g. Marfan's syndrome, Kawasaki disease, fibromuscular dysplasia, etc).

Several limitations in the current work should be considered. First, although a comprehensive analysis of 200 human arterial specimens is a considerable technical accomplishment resulting in much greater power to discern real patterns in the data, and despite the fact that we used stringent statistical methods and other information theoretical considerations to minimize false positives (generally to  $\leq 5\%$ ), there remains the possibility of residual confounding or limited statistical power which could obscure both positive and negative associations. This is especially true for the AA samples where the number of significantly diseased arterial samples was more limited than in the LAD. The fact that many of the sentinel findings generated by the initial data dependent MS approach were subsequently confirmed and strengthened by a separate data independent acquisition MS method (which typically utilizes different peptides for protein identification) provides further support for the validity of the findings. Second, the fact that the samples were all collected post-mortem raises questions about possible effects of death on the stability of individual proteins or specific cellular functional processes. If such effects are differentially manifest in normal versus atherosclerotic tissues, this could give the appearance of differences by disease status that are not present during life. It is reassuring that many of the individual proteins identified here overlap with findings from animal models of atherosclerosis and *in-vitro* studies where the effects of post-mortem hypoxia and cessation of cellular metabolic activity are more easily minimized. Third, the observed differences in the proteome between normal and diseased samples represent a unique, albeit macroscopic view of the proteomic architecture of human coronary and distal aortic atherosclerosis based on analysis of hundreds of proteins. Much more work is required to clarify the functional role of the specific proteins, protein networks and pathways identified here, and to establish if there is therapeutic value in manipulating them – perhaps even in an anatomically specific manner.

In summary, these data represent the most comprehensive description of the human coronary and aortic proteome to date and reveal numerous proteins, networks and pathways that are strongly indicative of early atherosclerosis. They also indicate fundamental differences in mitochondrial dynamics between the coronary

artery and the distal aorta in both normal and atherosclerotic conditions. The data analyses highlight the value of new methods to extricate tissue phenotypes from heterogeneous tissue samples and depict dynamic features of protein networks that vary as a function of disease state and anatomic location. These data and methods establish a new foundation for future research to better understand the human arterial proteomic architecture in health and disease.

## **Author Contributions:**

D.H., J.V.E., Yue W., R.V.H., J.H. designed the project, supervised the execution of the research plan, and made significant contributions to the interpretation and presentation of the results; C.M. and S.P. provided critical project management and scientific direction concerning specific aspects of the data acquisition and bioinformatic analyses; Z.F. and V.V. were primarily responsible for generation and annotation of the mass-spectrometry data; G.Y, L.C, Y.F., Y.W., J.G., G.S. performed data analysis; T.H. and Y.L. contributed to genomic analyses and interpretation; D.T. and G.A. and were responsible for collecting, grading, storing and shipping the pathologic specimens.

## **Acknowledgments:**

This work was supported by 1R01HL111362 from the, National Heart, Lung and Blood Institute of the National Institutes of Health

## Methods

### Arterial Sample Acquisition and Pathology Grading Methods

Male and female cases of any race, aged 18-50 years (men) or 18-60 years (women) with no ante mortem clinical suspicion of coronary disease autopsied < 24 hours of death were eligible for inclusion. This report includes data from the first 100 adult coroner cases included in the study (age range:15-55 yrs., 75% males, 67% White, 26% Black, 7% Other). The Medico-Legal Death Investigators obtain signed family consent for retrieval of anatomic specimens prior to the autopsy. During the autopsy the pathologist dissects the aorta (ligamentum arteriosum to aortic bifurcation) and LAD and removes branching arteries and adventitial or epicardial adipose tissue. Both the aorta and LAD are opened longitudinally, cleansed of blood and photographed (**Supplemental Fig. 9a and b**). In each of the regions to be sampled, the pathologist inspects the intimal surface and categorizes the type and percent involvement of the following atherosclerotic changes: a) fatty streaks (FS); b) fibrous plaques (FP); c) complicated lesions (CL); and d) calcified lesions (CO), and records the data on a data collection form. Consistent with the age and cause of death (trauma), the fibrous plaques were almost exclusively early lesions - only one specimen had any macroscopic evidence of calcification and <3% of samples had any evidence of plaque hemorrhage, ulceration or thrombosis. Next the pathologist collects up to 1 gram of tissue from each of three standardized sections of the thoracic and abdominal aorta and two sections from the coronary artery <sup>35</sup> (**Supplemental Fig. 9c and d**). The specimens are snap frozen in cryotubes with liquid nitrogen and remain in a 34L VWR Cryogenic Dewar until transferred to a -80 freezer equipped with temperature alarms and automated generator back-up systems in the Department of Pathology at LSU. Additionally, targeted “pure” samples of grossly normal (non-lesion) and, if available, grossly atherosclerotic (lesion) are taken and divided into three 100mg portions and 1.) snap frozen, 2.) placed in RNALater solution and frozen, and 3.) placed in formalin and stored at room temperature for possible future immunohistochemistry analyses. A 50 gram sample of liver is also collected and frozen for future studies. All samples received at LSU are checked for label accuracy and entered in a database using an unlinked anonymous code for further processing, analyses and storage.

## Protein Extraction, MS Analysis and Protein Identification

Aorta and LAD tissues were pulverized in liquid nitrogen and homogenized in 8M urea, 2M thiourea, 4% CHAPs and 1% DTT using Dounce homogenizer for 100 strokes, centrifuged at 16000 rpm for 20 mins . Protein concentration of the supernatant was assessed by CB-X assay kit (G-Biosciences MO, USA). 100 µg of protein was precipitated using 2-D clean-up kit (GE Healthcare MA, USA) and then reconstitute in 6M urea, 50mM ammonium bicarbonate. The protein was reduced, alkylated and digested with trypsin (1:20). Peptides were desalted using Oasis HLB 96-well Plate (Waters MA, USA). A total of 2.0 µg of peptides per sample were then analyzed using label-free quantification on a reversed-phase liquid chromatography tandem mass spectrometry (RPLC–MS/MS) online with an Orbitrap Elite mass spectrometer (Thermo Scientific, USA) coupled to an Easy-nLC 1000 system (Thermo Scientific, USA). Peptides concentrated on a C18 trap column (Acclaim PepMap 100, 300 µm × 5 mm, C18, 5 µm, 100 Å; maximum pressure 800bar) in 0.1% TFA, then separated on a C18 analytical column (Acclaim PepMap RSLC, 75 µm × 15 cm, nano Viper, C18, 2 µm, 100 Å) using a linear gradient from 5% to 35% solvent B over 155 mins (solvent A: 0.1% aqueous formic acid and solvent B: 0.1% formic acid in acetonitrile; flow rate 350 nL/min; column oven temperature 45 °C). The analysis was operated in a data-dependent mode with full scan MS spectra acquired at a resolution of 60,000 in the Orbitrap analyzer, followed by tandem mass spectra of the 20 most abundant peaks in the linear ion trap after peptide fragmentation by collision-induced dissociation (CID).

To eliminate batch effect, the same parameters were used for mass spectra acquisition and the peptides from each individual were analyzed randomly in one batch. To minimize cross contamination, a blank run was performed between each sample. To monitor column performance, 200fmol BSA digested peptides were analyzed to make sure elution time of same peptide were within 0.2 minutes and signal intensity and total spectra counts variation were less than 10%. One LAD and one AA sample (from different subjects) were excluded because of poor protein yield leaving n=99 samples from each territory for analysis.

The MS/MS data obtained from the Orbitrap Elite were converted to mzXML and mgf format using Msconvert version 3.0.3858 from ProteoWizard<sup>36</sup> for peaklist generation. All data were searched using the X!Tandem<sup>37</sup> algorithm version 2009.10.01.1 and OMSSA<sup>38</sup> algorithm version 2.1.9. The dataset was searched against the concatenated target/decoy<sup>39</sup> Human Uniprot<sup>40</sup> database as of July 24, 2015, with only reviewed and canonical

sequences used. The search parameters were as follows: Fixed modification of Carbamidomethyl (C) and variable modifications of Oxidation (M), Phosphorylation (STY); Enzyme: Trypsin with 2 maximum missed cleavages; Parent Tolerance: 0.050.08 Da; Fragment tolerance: 1.00 Da. Post-search analysis was performed using Trans Proteomic Pipeline<sup>41</sup> version v4.6, rev 1 with protein group and peptide probability thresholds set to 90% and 90%, respectively, and one or more distinct peptide required for identification. PeptideProphet<sup>42</sup> was used for peptide validation from each individual search algorithm and iProphet<sup>43</sup> was used to merge results from the separate algorithms and further refine the identification probabilities. Lastly, ProteinProphet<sup>44</sup> was then used to infer protein identifications from the resulting combined peptide list and perform grouping of ambiguous hits. Protein Group and Peptide False Discovery Rates were calculated automatically using a target-decoy method for the above probability thresholds (0.72% and 0.06% respectively). Protein isoforms were only reported if a peptide comprising an amino acid sequence that was unique to the isoform was identified. Label-free quantification of each protein was performed using weighted spectral counting<sup>45</sup>. The distribution of protein spectral counts for each data file was inspected to verify equivalence in sample loading and instrument performance between files. Based on this analysis, a median normalization (adjustment of the raw spectral counts for each protein of a given file to the median of all spectral counts observed for the same file) was performed (**Supplemental Fig. 10**).

The final non-redundant protein groups were analyzed through the use of IPA (Ingenuity® Systems, [www.ingenuity.com](http://www.ingenuity.com)) to generate network, functional and pathway analyses. The MS/MS proteomics data have been deposited to the ProteomeXchange Consortium (<http://www.proteomexchange.org>) via the PRIDE partner repository<sup>46</sup> with the dataset identifier (# to be added at the time of publication).

### **Post-processing Quality Control and Data Imputation**

A total of 1925 unambiguous proteins were detected in one or more of the 99 LAD samples. Of these proteins 944 had  $\leq 50\%$  missingness and 375 had no missingness in all 99 samples (**Supplemental Fig. 11a, d**). PCA analysis of the 375 proteins with complete data from every sample failed to identify significant sample outliers or important batch effects (**Supplemental Fig. 11c**). Missing values for the 944 proteins with  $\leq 50\%$  missingness were imputed using a low rank approximation derived from non-linear iterative partial least squares (NIPALS) PCA<sup>47</sup> (**Supplemental Fig. 11b**). All subsequent analyses including regression, WCNA,



and CAM were performed on this imputed data set. Exploratory regression analysis of proteins with > 50% missingness using missingness encoding failed to identify proteins with compelling association with disease and these proteins were subsequently dropped from further consideration. In a similar manner the AA samples revealed 1495 unambiguous proteins including 725 with  $\leq 50\%$  missingness and no important batch effects or extreme outliers.

### **Analysis of Association with Extent of Atherosclerosis**

Three orthogonal strategies (regression, weighted co-expression analysis, convex analysis of mixtures) were employed to identify proteins individually or jointly associated with extent of disease.

*Regression Models:* MANOVA models with adjustment for age, sex, and race were used to model the joint distributions of % intimal surface demonstrating fibrous plaque (FP), streaks (FS), and normal (NL) intima as a function of each individual protein. To account for possible differences in tissue sample volumes, cellular composition or protein yields the models were also adjusted for several housekeeping proteins (Proteasome subunit beta type-2, Small nuclear ribonucleoprotein Sm D3, Receptor expression-enhancing protein 5, Ras-related protein Rab-7a) and Myosin-11 (a vascular smooth muscle cell marker protein). Separately, generalized linear models (GLM) were used to examine the association between individual proteins and %FP or %NL after adjustment for age, sex, race and the same set of housekeeping and VSMC genes. In the models of %FP the reference was, by definition, the % intimal surface demonstrating fatty streaks or normal intima. In contrast, in models of %NL the reference was, by definition, the % intimal surface demonstrating fatty streaks or fibrous plaques. Accordingly we developed separate models using each trait (%FP or %NL) as the dependent variable with the expectation that direction of effect would be inversely related depending on the dependent variable used. Proteins with beta coefficients in the same direction for both %FP and %NL were excluded from further consideration. In a similar manner ordinal regression was also used to examine the association between individual proteins and % FP or % NL treated as three level ordinal variables (FP: 0%, 1-59%,  $\geq 60\%$ ; NL: 100%, 99-61%, <60%). Exploratory models using robust GLM with logit link produced qualitatively similar lists of significantly associated proteins (data not shown).

*Weighted Co-Expression Network Modelling:* The WGCNA package in R was used to identify distinct protein modules among the 94 proteins used for analysis<sup>48</sup>. A weighted power adjacency matrix was constructed using signed bi-correlations between proteins and mapping the results onto the 0-1 interval. The power parameter was selected such that the topological overlap connectivity ( $k$ ) of the entire network approximated a scale-free topology. The topological overlap was used to create a dissimilarity matrix for hierarchical clustering to identify modules. To assess stability of module assignments, 50 bootstrap samples of the data were created and each one interrogated using identical WGCNA parameters. Once the modules were determined, regression models were developed to examine the association between module eigengenes and the arterial phenotypes (%FP and % NL) after adjustment for age, sex, and race.

#### *Convex Analysis of Mixtures and Protein Expression Differences in Complex Tissues Analysis*

Tissue heterogeneity is present in our samples where multiple tissue types are variably mixed and co-exist<sup>49,50</sup>, representing a major confounder when studying tissue-specific disease markers<sup>51-53</sup>. We have recently devised CAM, a fully unsupervised data deconvolution method that exploits the strong parallelism between a latent variable model and the theory of convex sets<sup>54</sup>. With the newly-proven mathematical theorems, we showed that the simplex of mixed expressions is a rotated and compressed version of the simplex of tissue expressions in scatter space<sup>55</sup> (**Fig. 3**). The vertices of the scatter simplex, characterized by the molecular markers whose expressions are maximally enriched in a particular tissue, define the optimal data-derived distinctive tissue types present in the heterogeneous samples.

CAM works by geometrically identifying the vertices (and their resident molecular markers) of the scatter simplex of globally measured expressions (**Fig. 3a**), *i.e.*, determining the multifaceted simplex that most tightly encloses the mixed expression profiles (**Fig. 3d**), and subsequently estimate the proportions and specific expression profiles of constituent subpopulations<sup>55</sup> (**Fig. 3b**). Tissue samples to be analyzed by CAM contain unknown number and varying proportions of molecularly distinctive (including novel) tissue types (**Fig. 3e**). Molecular expression in a specific tissue is modeled as being linearly proportional to the abundance of that tissue and the number of tissues present is determined by the newly-derived minimum description length (MDL) criterion<sup>55</sup>.

We first eliminate proteins whose signal intensity (vector norm) is lower than 5% (noise) or higher than 95% (outlier) of the mean value over all proteins. The signals from these proteins are unreliable and could have a negative impact on the subsequent deconvolution. Second, dimension reduction is performed on the raw measurements using principal component analysis with 10 PCs. To further reduce the impact of noise/outlier data points and permit appropriate parameterization of the MDL criterion to determine the number of tissues, we aggregate protein vectors into representative clusters using affinity propagation clustering (APC)<sup>56-58, 22</sup>. As an initialization-free and near-global-optimum clustering method, APC simultaneously considers all protein vectors as potential exemplars and recursively exchanges real-valued ‘messages’ between protein vectors until a high-quality set of exemplars and corresponding clusters gradually emerge. CAM detected four tissues from LAD simplex (**Fig. 3d**) and three tissues from AA simplex (**Supplemental Fig. 6c**). On the basis of the expression levels of tissue-specific marker proteins detected by CAM, the relative proportions of constituent tissues are estimated using standardized averaging that are then used to deconvolute the mixed expressions into tissue-specific profiles by non-negative least-square regression techniques<sup>55</sup>. Upregulated marker proteins associated with specific tissues can be detected by One-Versus-Everyone (OVO) fold change thresholding, e.g., currently set to 2 for FP tissue.

### **GO Term and Pathway Enrichment Analysis**

GO Term and pathway enrichment analyses using GO Term Finder<sup>59</sup>, and IPA (Ingenuity Pathway Analysis, Ingenuity Systems, Redwood City, CA) tools were used to characterize the evaluable proteins obtained from the arterial samples (**Supplemental Tables 1-4**). For the GO term enrichment analysis, clustering based on semantic similarity was used to indicate which child nodes could be represented by higher level parent nodes<sup>60</sup>. For the pathway analysis, the significant differentially expressed proteins with |fold change|  $\geq 1.7$  and the false discovery rate (FDR) corrected p-value of 0.05 were analyzed with IPA for pathways, upstream regulators, and associated diseases and biological functions. The following parameters were used for these analyses: 1) Human genes in the Ingenuity Knowledge Base were used as the reference set; 2) Both the direct and indirect relationships were considered; 3) The confidence level was set to be “Experimentally Observed” and “High predicted” with high confidence scores; 4) The following selected tissues/cell types were used: heart, smooth muscle, fibroblasts, cardiomyocytes, endothelial cells, smooth muscle cells, and macrophages. The p-

values for the identified canonical pathways, disease associations and functions were calculated using Fisher's exact test. The Benjamini-Hochberg method was used to estimate the false discovery rate, and an FDR-corrected p-value of 0.05 was used to select significantly enriched pathways. The significant upstream regulators were selected using p-value  $\leq 0.05$  and  $|Z\text{-score}| \geq 2$ .

### **Differential Dependent Network Analyses**

Modeling biological networks is an important tool in systems biology to study the orchestrated activities of gene products in cells<sup>26</sup>. Significant rewiring of these networks provides a unique perspective on phenotypic transitions that can occur in biological systems<sup>61</sup>. Thus, instead of asking “which genes are differentially expressed”, a more interesting question is “which genes are differentially connected?”<sup>26,62</sup>. To systematically characterize selectively activated or deactivated regulatory components and mechanisms, the modeling tools must effectively distinguish significant rewiring from random background fluctuations. We have developed an integrated molecular network learning method, within a well-grounded mathematical framework, to construct differential dependency networks with significant rewiring<sup>23,63</sup>. This knowledge-fused differential dependency networks (kDDN) method, implemented as a Java Cytoscape app, can be used to optimally integrate prior biological knowledge with measured data to simultaneously construct both common and differential networks<sup>64,65</sup>.

kDDN algorithm jointly learns the shared biological network and statistically significant rewiring across different phenotypes. Phenotype-specific data and prior knowledge are quantitatively fused via an extended Lasso model with  $l_1$  regularized convex optimization formulation<sup>64</sup>. Based on the unique nature of the problem, we derive an efficient closed-form solution for the embedded sub-problem solved by the block-wise coordinate descent (BCD) algorithm. Since existing knowledge is often nonspecific or imperfect, kDDN uses a “minimax” strategy to maximize the benefit of prior knowledge while confining its negative impact under the worst-case scenario. Furthermore, kDDN matches the values of model parameters to the expected false positive rates on network edges at a specified significance level, and assesses edge-specific p-values on each of the differential connections<sup>64</sup>.

We use kDDN to construct the network and detect significant network rewiring between FP and NL groups, where an extended Lasso-based sparse Gaussian graphic model is used to capture the network structure. The

network rewiring under different phenotypes is inferred jointly by performing the BCD algorithms sequentially for all nodes. We then used permutation-based significance test to estimate p-values of the detected differential dependence edges<sup>63,64</sup>. Those detected differential dependence edges with p-values larger than 0.05 were filtered out for control of false positive rate. We used different colors to distinguish differential dependency edges under each phenotype, and use solid/dashed lines to indicate positive/negative dependences between nodes. The linewidths of edges correspond to the dependency strength to give a straightforward illustration and a better comparison within the network.



## Proteomic Architecture of Human Coronary and Aortic Atherosclerosis

Herrington David M<sup>1\*</sup>, Mao Chunhong<sup>2</sup>, Parker Sarah<sup>3</sup>, Fu Zongming<sup>4</sup>, Yu Guoqiang<sup>5</sup>, Chen Lulu<sup>5</sup>, Venkatraman Vidya<sup>3</sup>, Fu Yi<sup>5</sup>, Wang Yizhi<sup>5</sup>, Howard Tim<sup>6</sup>, Goo Jun<sup>7</sup>, Zhao CF<sup>1</sup>, Liu Yongming<sup>8</sup>, Saylor Georgia<sup>1</sup>, Athas Grace<sup>9</sup>, Troxclair Dana<sup>9</sup>, Hixson James<sup>7\*</sup>, Vander Heide Richard<sup>9\*</sup>, Wang Yue<sup>4\*</sup>, Van Eyk Jennifer<sup>3\*</sup> (\*contributed equally)

### Supplemental Tables

#### Table of Contents

|                        |                                                                                                                                                                                                   |
|------------------------|---------------------------------------------------------------------------------------------------------------------------------------------------------------------------------------------------|
| Supplemental Table 1.  | Human Arterial Proteins from Left Anterior Descending (LAD) Coronary Artery (N=99) and Distal Abdominal Aortic (AA) (N=99) Samples                                                                |
| Supplemental Table 2a. | Human LAD Protein GO Terms: Biologic Processes (top 100 GO Terms)                                                                                                                                 |
| Supplemental Table 2b. | Human LAD Protein GO Terms: Molecular Functions (adj. p-value < 0.05*)                                                                                                                            |
| Supplemental Table 2c. | Human LAD Protein GO Terms: Cellular Component (adj. p-value < 0.05*)                                                                                                                             |
| Supplemental Table 3a. | Human Distal Aortic Protein GO Terms: Biologic Process (top 100 GO Terms)                                                                                                                         |
| Supplemental Table 3b. | Human Distal Aortic Protein GO Terms: Molecular Function (adj. p-value < 0.05*)                                                                                                                   |
| Supplemental Table 3c. | Human Distal Aortic Protein GO Terms: Cellular Component (adj. p-value < 0.05*)                                                                                                                   |
| Supplemental Table 4.  | Enriched Ingenuity Canonical Pathways Among 944 Human LAD Proteins (FDR<0.001)                                                                                                                    |
| Supplemental Table 5.  | Enriched Ingenuity Canonical Pathways among 725 Human Distal Aortic Proteins (FDR<0.001)                                                                                                          |
| Supplemental Table 6.  | Regression Models of Association Between Individual Proteins and Extent of Surface Area Involved with Fibrous Plaque (FP) or Normal Intima (NML) in Human LAD Arterial Samples (top 100 proteins) |
| Supplemental Table 7.  | Regression Models of Association Between Individual Proteins and Extent of Surface Area Involved with Fibrous Plaque (FP) or Normal (NML) in Human Abdominal Aorta Samples (top 100 proteins)     |
| Supplemental Table 8.  | Up-Regulated Proteins in LAD Fibrous Plaque Samples (n=15) Compared with Normal LAD Samples (n=30)                                                                                                |
| Supplemental Table 9.  | Down-Regulated Proteins in LAD Fibrous Plaque Samples (n=15) Compared with Normal LAD Samples (n=30)                                                                                              |
| Supplemental Table 10. | Predicted Upstream Master Regulators for Up- and Down-Regulated Fibrous Plaque Proteins                                                                                                           |



- Supplemental Table 11. Up-Regulated Proteins in Fibrous Plaque Enriched AA Samples (n=7) Compared with Normal AA Samples (n=15)
- Supplemental Table 12. Down-Regulated Proteins in Fibrous Plaque Enriched AA Samples (n=7) Compared with Normal AA Samples (n=15)
- Supplemental Table 13. Overlap of Patho-Proteomic Fibrous Plaque Proteins in Human LAD (n=99) and AA (n=99) Samples

**Supplemental Table 1. Human Arterial Proteins from Left Anterior Descending (LAD) Coronary Artery (N=99) and Distal Abdominal Aortic (AA) (N=99) Samples**

<Data can be viewed at Peptide Atlas <http://www.peptideatlas.org/PASS/PASS01066>>

**Supplemental Table 2a Human LAD Protein GO Terms: Biologic Processes (top 100 GO Terms)**

| <u>GO Term ID</u> | <u>Description</u>                             | <u># of proteins</u> | <u>log(p-value)*</u> |
|-------------------|------------------------------------------------|----------------------|----------------------|
| GO:0044710        | single-organism metabolic process              | 490                  | -69.46               |
| GO:0044699        | single-organism process                        | 807                  | -62.11               |
| GO:0044281        | small molecule metabolic process               | 293                  | -53.18               |
| GO:0044763        | single-organism cellular process               | 737                  | -47.07               |
| GO:0009987        | cellular process                               | 821                  | -41.91               |
| GO:0071840        | cellular component organization or biogenesis  | 445                  | -40.94               |
| GO:0016192        | vesicle-mediated transport                     | 181                  | -40.34               |
| GO:0030198        | extracellular matrix organization              | 91                   | -40.29               |
| GO:0043062        | extracellular structure organization           | 91                   | -40.16               |
| GO:0008152        | metabolic process                              | 661                  | -38.93               |
| GO:0019752        | carboxylic acid metabolic process              | 146                  | -36.47               |
| GO:0006082        | organic acid metabolic process                 | 156                  | -35.83               |
| GO:0006810        | transport                                      | 341                  | -35.55               |
| GO:0055114        | oxidation-reduction process                    | 110                  | -33.01               |
| GO:0006950        | response to stress                             | 329                  | -32.61               |
| GO:1901564        | organonitrogen compound metabolic process      | 227                  | -32.56               |
| GO:0006897        | endocytosis                                    | 111                  | -32.55               |
| GO:0071704        | organic substance metabolic process            | 615                  | -32.36               |
| GO:0051179        | localization                                   | 390                  | -32.34               |
| GO:0065008        | regulation of biological quality               | 274                  | -31.59               |
| GO:0009056        | catabolic process                              | 218                  | -31.57               |
| GO:0009611        | response to wounding                           | 130                  | -30.88               |
| GO:0044707        | single-multicellular organism process          | 349                  | -27.85               |
| GO:0006091        | generation of precursor metabolites and energy | 85                   | -27.46               |
| GO:0050896        | response to stimulus                           | 513                  | -27.35               |
| GO:0072376        | protein activation cascade                     | 61                   | -26.78               |
| GO:0009605        | response to external stimulus                  | 201                  | -24.80               |
| GO:0042060        | wound healing                                  | 101                  | -24.20               |
| GO:0050817        | coagulation                                    | 92                   | -23.59               |
| GO:0071822        | protein complex subunit organization           | 167                  | -22.67               |
| GO:0032501        | multicellular organismal process               | 383                  | -22.47               |
| GO:0022607        | cellular component assembly                    | 199                  | -21.77               |
| GO:0002576        | platelet degranulation                         | 36                   | -21.35               |
| GO:0002253        | activation of immune response                  | 99                   | -21.31               |
| GO:0044238        | primary metabolic process                      | 565                  | -21.23               |
| GO:0050878        | regulation of body fluid levels                | 95                   | -21.10               |
| GO:0042221        | response to chemical                           | 295                  | -20.70               |
| GO:0006956        | complement activation                          | 51                   | -20.35               |
| GO:0050778        | positive regulation of immune response         | 104                  | -19.57               |
| GO:0000904        | cell morphogenesis involved in differentiation | 111                  | -19.30               |
| GO:0044237        | cellular metabolic process                     | 562                  | -19.28               |
| GO:0044085        | cellular component biogenesis                  | 201                  | -19.08               |
| GO:0030162        | regulation of proteolysis                      | 91                   | -19.07               |
| GO:0051641        | cellular localization                          | 218                  | -18.51               |
| GO:0006959        | humoral immune response                        | 61                   | -18.28               |
| GO:0032502        | developmental process                          | 305                  | -17.68               |
| GO:0006952        | defense response                               | 174                  | -17.37               |
| GO:0006898        | receptor-mediated endocytosis                  | 65                   | -17.33               |
| GO:0009141        | nucleoside triphosphate metabolic process      | 49                   | -17.01               |
| GO:0002376        | immune system process                          | 211                  | -16.81               |
| GO:0072524        | pyridine-containing compound metabolic process | 35                   | -16.63               |

|            |                                                        |     |        |
|------------|--------------------------------------------------------|-----|--------|
| GO:0048584 | positive regulation of response to stimulus            | 181 | -16.60 |
| GO:0046496 | nicotinamide nucleotide metabolic process              | 34  | -16.58 |
| GO:0033036 | macromolecule localization                             | 185 | -16.54 |
| GO:0008104 | protein localization                                   | 165 | -16.03 |
| GO:0048518 | positive regulation of biological process              | 339 | -15.70 |
| GO:0061024 | membrane organization                                  | 116 | -15.42 |
| GO:0019538 | protein metabolic process                              | 350 | -15.32 |
| GO:0046907 | intracellular transport                                | 160 | -14.83 |
| GO:0048583 | regulation of response to stimulus                     | 265 | -14.71 |
| GO:0040011 | locomotion                                             | 145 | -14.58 |
| GO:0051128 | regulation of cellular component organization          | 163 | -14.39 |
| GO:0006928 | cellular component movement                            | 157 | -14.38 |
| GO:0005975 | carbohydrate metabolic process                         | 101 | -14.34 |
| GO:0006508 | proteolysis                                            | 128 | -14.21 |
| GO:0005996 | monosaccharide metabolic process                       | 48  | -14.20 |
| GO:0002252 | immune effector process                                | 93  | -14.14 |
| GO:0051186 | cofactor metabolic process                             | 54  | -14.02 |
| GO:0044711 | single-organism biosynthetic process                   | 148 | -14.01 |
| GO:0065007 | biological regulation                                  | 582 | -13.93 |
| GO:0031589 | cell-substrate adhesion                                | 46  | -13.71 |
| GO:0002682 | regulation of immune system process                    | 149 | -13.70 |
| GO:0080134 | regulation of response to stress                       | 135 | -13.56 |
| GO:0044282 | small molecule catabolic process                       | 53  | -13.12 |
| GO:0070887 | cellular response to chemical stimulus                 | 207 | -13.07 |
| GO:0030029 | actin filament-based process                           | 72  | -13.03 |
| GO:0050789 | regulation of biological process                       | 553 | -12.87 |
| GO:0045087 | innate immune response                                 | 128 | -12.85 |
| GO:0002673 | regulation of acute inflammatory response              | 23  | -12.80 |
| GO:0032879 | regulation of localization                             | 166 | -12.67 |
| GO:0051130 | positive regulation of cellular component organization | 101 | -12.60 |
| GO:0006793 | phosphorus metabolic process                           | 212 | -12.59 |
| GO:0043086 | negative regulation of catalytic activity              | 86  | -12.58 |
| GO:0006457 | protein folding                                        | 40  | -12.45 |
| GO:0009636 | response to toxic substance                            | 32  | -12.42 |
| GO:1901135 | carbohydrate derivative metabolic process              | 120 | -12.26 |
| GO:0061615 | glycolytic process through fructose-6-phosphate        | 17  | -12.10 |
| GO:0051246 | regulation of protein metabolic process                | 191 | -12.05 |
| GO:0019637 | organophosphate metabolic process                      | 99  | -11.94 |
| GO:0007010 | cytoskeleton organization                              | 96  | -11.92 |
| GO:0002526 | acute inflammatory response                            | 26  | -11.89 |
| GO:0034446 | substrate adhesion-dependent cell spreading            | 24  | -11.87 |
| GO:0006935 | chemotaxis                                             | 89  | -11.84 |
| GO:0048468 | cell development                                       | 136 | -11.83 |
| GO:0022610 | biological adhesion                                    | 109 | -11.72 |
| GO:0006955 | immune response                                        | 155 | -11.61 |
| GO:0001775 | cell activation                                        | 88  | -11.51 |
| GO:0072350 | tricarboxylic acid metabolic process                   | 18  | -11.43 |
| GO:1901657 | glycosyl compound metabolic process                    | 53  | -11.26 |
| GO:0052547 | regulation of peptidase activity                       | 52  | -11.17 |

\* Bonferroni corrected p-value

**Supplemental Table 2b. Human LAD Protein GO Terms: Molecular Functions (adj. p-value < 0.05\*)**

| <u>GO Term ID</u> | <u>Description</u>                                                                    | <u># of proteins</u> | <u>log(p-value)*</u> |
|-------------------|---------------------------------------------------------------------------------------|----------------------|----------------------|
| GO:0005515        | protein binding                                                                       | 719                  | -50.25               |
| GO:0005488        | binding                                                                               | 780                  | -49.47               |
| GO:0044822        | poly(A) RNA binding                                                                   | 160                  | -29.24               |
| GO:0005198        | structural molecule activity                                                          | 94                   | -24.83               |
| GO:0003723        | RNA binding                                                                           | 169                  | -24.82               |
| GO:0032403        | protein complex binding                                                               | 101                  | -24.66               |
| GO:0043167        | ion binding                                                                           | 165                  | -23.14               |
| GO:0008092        | cytoskeletal protein binding                                                          | 86                   | -21.19               |
| GO:0043168        | anion binding                                                                         | 113                  | -17.67               |
| GO:0097367        | carbohydrate derivative binding                                                       | 89                   | -17.58               |
| GO:0003779        | actin binding                                                                         | 46                   | -16.90               |
| GO:0016491        | oxidoreductase activity                                                               | 79                   | -16.89               |
| GO:0097159        | organic cyclic compound binding                                                       | 253                  | -15.65               |
| GO:0003824        | catalytic activity                                                                    | 310                  | -14.77               |
| GO:0016209        | antioxidant activity                                                                  | 23                   | -13.55               |
| GO:1901363        | heterocyclic compound binding                                                         | 241                  | -13.24               |
| GO:0005539        | glycosaminoglycan binding                                                             | 32                   | -12.80               |
| GO:0005200        | structural constituent of cytoskeleton                                                | 26                   | -12.64               |
| GO:0016616        | oxidoreductase activity, acting on the CH-OH group of donors, NAD or NADP as acceptor | 26                   | -12.47               |
| GO:0042802        | identical protein binding                                                             | 107                  | -11.64               |
| GO:0036094        | small molecule binding                                                                | 81                   | -11.00               |
| GO:0016614        | oxidoreductase activity, acting on CH-OH group of donors                              | 26                   | -10.98               |
| GO:0004857        | enzyme inhibitor activity                                                             | 47                   | -10.48               |
| GO:0005201        | extracellular matrix structural constituent                                           | 20                   | -9.54                |
| GO:0061135        | endopeptidase regulator activity                                                      | 28                   | -9.34                |
| GO:0019899        | enzyme binding                                                                        | 127                  | -9.25                |
| GO:0030234        | enzyme regulator activity                                                             | 75                   | -8.88                |
| GO:1901681        | sulfur compound binding                                                               | 29                   | -8.80                |
| GO:0043169        | cation binding                                                                        | 82                   | -8.74                |
| GO:0046872        | metal ion binding                                                                     | 75                   | -7.98                |
| GO:0016787        | hydrolase activity                                                                    | 141                  | -7.76                |
| GO:0034987        | immunoglobulin receptor binding                                                       | 13                   | -7.27                |
| GO:0050839        | cell adhesion molecule binding                                                        | 29                   | -7.08                |
| GO:0016684        | oxidoreductase activity, acting on peroxide as acceptor                               | 14                   | -7.08                |
| GO:0008289        | lipid binding                                                                         | 53                   | -6.88                |
| GO:0005102        | receptor binding                                                                      | 104                  | -6.75                |
| GO:0003676        | nucleic acid binding                                                                  | 187                  | -6.62                |
| GO:0008201        | heparin binding                                                                       | 20                   | -6.30                |
| GO:0044548        | S100 protein binding                                                                  | 9                    | -6.24                |
| GO:0005518        | collagen binding                                                                      | 16                   | -6.24                |
| GO:0004601        | peroxidase activity                                                                   | 13                   | -6.13                |
| GO:0001948        | glycoprotein binding                                                                  | 18                   | -6.02                |
| GO:0009055        | electron carrier activity                                                             | 20                   | -6.00                |
| GO:0005178        | integrin binding                                                                      | 19                   | -5.58                |
| GO:0017111        | nucleoside-triphosphatase activity                                                    | 59                   | -5.27                |
| GO:0005509        | calcium ion binding                                                                   | 34                   | -5.26                |
| GO:0048306        | calcium-dependent protein binding                                                     | 14                   | -5.15                |
| GO:1901265        | nucleoside phosphate binding                                                          | 53                   | -4.84                |
| GO:0048037        | cofactor binding                                                                      | 23                   | -4.69                |
| GO:0016817        | hydrolase activity, acting on acid anhydrides                                         | 60                   | -4.59                |
| GO:0000166        | nucleotide binding                                                                    | 52                   | -4.46                |
| GO:0070325        | lipoprotein particle receptor binding                                                 | 9                    | -4.00                |
| GO:0051082        | unfolded protein binding                                                              | 15                   | -4.00                |

|            |                                                                        |    |       |
|------------|------------------------------------------------------------------------|----|-------|
| GO:0005496 | steroid binding                                                        | 15 | -3.34 |
| GO:0019900 | kinase binding                                                         | 46 | -3.28 |
| GO:0016853 | isomerase activity                                                     | 20 | -3.20 |
| GO:0046983 | protein dimerization activity                                          | 64 | -3.16 |
| GO:0001848 | complement binding                                                     | 7  | -2.98 |
| GO:0008307 | structural constituent of muscle                                       | 11 | -2.98 |
| GO:0017166 | vinculin binding                                                       | 6  | -2.82 |
| GO:0042803 | protein homodimerization activity                                      | 53 | -2.77 |
| GO:0046914 | transition metal ion binding                                           | 38 | -2.75 |
| GO:0003823 | antigen binding                                                        | 34 | -2.74 |
| GO:0043178 | alcohol binding                                                        | 14 | -2.67 |
| GO:0002020 | protease binding                                                       | 16 | -2.53 |
| GO:0016835 | carbon-oxygen lyase activity                                           | 11 | -2.52 |
| GO:0051087 | chaperone binding                                                      | 13 | -2.50 |
| GO:0031625 | ubiquitin protein ligase binding                                       | 29 | -2.49 |
| GO:0016860 | intramolecular oxidoreductase activity                                 | 10 | -2.43 |
| GO:0044389 | small conjugating protein ligase binding                               | 29 | -2.38 |
| GO:0019003 | GDP binding                                                            | 11 | -2.31 |
| GO:0023026 | MHC class II protein complex binding                                   | 7  | -2.28 |
| GO:0043394 | proteoglycan binding                                                   | 7  | -2.28 |
| GO:0055102 | lipase inhibitor activity                                              | 6  | -2.21 |
|            | oxidoreductase activity, acting on a sulfur group of donors            |    |       |
| GO:0016667 |                                                                        | 10 | -2.09 |
| GO:0016801 | hydrolase activity, acting on ether bonds                              | 5  | -2.06 |
| GO:0008233 | peptidase activity                                                     | 42 | -1.99 |
| GO:0004175 | endopeptidase activity                                                 | 30 | -1.98 |
| GO:0019001 | guanyl nucleotide binding                                              | 18 | -1.95 |
| GO:0004064 | arylesterase activity                                                  | 4  | -1.75 |
| GO:0004301 | epoxide hydrolase activity                                             | 4  | -1.75 |
| GO:0023023 | MHC protein complex binding                                            | 7  | -1.74 |
| GO:0019865 | immunoglobulin binding                                                 | 5  | -1.72 |
|            | oxidoreductase activity, acting on the aldehyde or oxo group of donors |    |       |
| GO:0016903 |                                                                        | 10 | -1.60 |
| GO:0015485 | cholesterol binding                                                    | 9  | -1.56 |
| GO:0032561 | guanyl ribonucleotide binding                                          | 17 | -1.44 |
| GO:0044325 | ion channel binding                                                    | 14 | -1.38 |
| GO:0060090 | binding, bridging                                                      | 19 | -1.33 |

\* Bonferroni corrected p-value

**Supplemental Table 2c. Human LAD Protein GO Terms: Cellular Component (adj. p-value < 0.05\*)**

| <u>GO Term ID</u> | <u>Description</u>                         | <u># of proteins</u> | <u>log(p-value)*</u> |
|-------------------|--------------------------------------------|----------------------|----------------------|
| GO:0031982        | vesicle                                    | 694                  | -300.00              |
| GO:0070062        | extracellular vesicular exosome            | 671                  | -300.00              |
| GO:0005925        | focal adhesion                             | 142                  | -84.66               |
| GO:0044444        | cytoplasmic part                           | 633                  | -81.64               |
| GO:0043226        | organelle                                  | 857                  | -77.12               |
| GO:0043227        | membrane-bounded organelle                 | 825                  | -73.16               |
| GO:0072562        | blood microparticle                        | 92                   | -71.56               |
| GO:0005829        | cytosol                                    | 352                  | -64.45               |
| GO:0031012        | extracellular matrix                       | 98                   | -60.94               |
| GO:0005737        | cytoplasm                                  | 712                  | -55.97               |
| GO:0030054        | cell junction                              | 154                  | -53.69               |
| GO:0015629        | actin cytoskeleton                         | 83                   | -26.96               |
| GO:0005578        | proteinaceous extracellular matrix         | 45                   | -22.33               |
| GO:0005856        | cytoskeleton                               | 165                  | -20.83               |
| GO:0032991        | macromolecular complex                     | 309                  | -19.25               |
| GO:0060205        | cytoplasmic membrane-bounded vesicle lumen | 31                   | -17.64               |
| GO:0031983        | vesicle lumen                              | 31                   | -17.44               |
| GO:0016020        | membrane                                   | 473                  | -16.77               |
| GO:0044424        | intracellular part                         | 763                  | -15.51               |
| GO:0043234        | protein complex                            | 259                  | -14.65               |
| GO:0005622        | intracellular                              | 768                  | -14.65               |
| GO:0005788        | endoplasmic reticulum lumen                | 38                   | -12.37               |
| GO:0043228        | non-membrane-bounded organelle             | 252                  | -12.26               |
| GO:0044422        | organelle part                             | 511                  | -11.60               |
| GO:0044433        | cytoplasmic vesicle part                   | 65                   | -11.38               |
| GO:0044437        | vacuolar part                              | 52                   | -10.91               |
| GO:0044446        | intracellular organelle part               | 500                  | -10.79               |
| GO:0031091        | platelet alpha granule                     | 22                   | -10.39               |
| GO:0045121        | membrane raft                              | 34                   | -10.18               |
| GO:0034358        | plasma lipoprotein particle                | 13                   | -8.87                |
| GO:0032994        | protein-lipid complex                      | 13                   | -8.21                |
| GO:0044449        | contractile fiber part                     | 27                   | -8.16                |
| GO:0005832        | chaperonin-containing T-complex            | 8                    | -7.80                |
| GO:0005885        | Arp2/3 protein complex                     | 8                    | -7.80                |
| GO:0005811        | lipid particle                             | 17                   | -7.67                |
| GO:0043292        | contractile fiber                          | 27                   | -7.38                |
| GO:0043229        | intracellular organelle                    | 639                  | -7.26                |
| GO:0042571        | immunoglobulin complex, circulating        | 12                   | -6.87                |
| GO:0044429        | mitochondrial part                         | 75                   | -6.87                |
| GO:0012505        | endomembrane system                        | 225                  | -6.71                |
| GO:0019814        | immunoglobulin complex                     | 12                   | -6.61                |
| GO:0005773        | vacuole                                    | 56                   | -6.55                |
| GO:0009986        | cell surface                               | 63                   | -6.12                |
| GO:0098589        | membrane region                            | 61                   | -6.12                |
| GO:0044448        | cell cortex part                           | 19                   | -6.09                |
| GO:0005581        | collagen trimer                            | 12                   | -5.69                |
| GO:0044445        | cytosolic part                             | 32                   | -5.65                |
| GO:0044853        | plasma membrane raft                       | 16                   | -5.53                |
| GO:0005739        | mitochondrion                              | 114                  | -5.44                |
| GO:0098552        | side of membrane                           | 46                   | -5.42                |
| GO:0005759        | mitochondrial matrix                       | 43                   | -5.13                |
| GO:0009897        | external side of plasma membrane           | 24                   | -5.11                |
| GO:0045259        | proton-transporting ATP synthase complex   | 10                   | -5.10                |
| GO:0048471        | perinuclear region of cytoplasm            | 43                   | -5.06                |
| GO:0005577        | fibrinogen complex                         | 7                    | -4.96                |



|                   |                                                      |     |       |
|-------------------|------------------------------------------------------|-----|-------|
| <b>GO:0005783</b> | <b>endoplasmic reticulum</b>                         | 109 | -4.68 |
| <b>GO:0005839</b> | <b>proteasome core complex</b>                       | 9   | -4.60 |
| <b>GO:0001725</b> | <b>stress fiber</b>                                  | 12  | -4.60 |
| <b>GO:0032432</b> | <b>actin filament bundle</b>                         | 12  | -4.44 |
| <b>GO:0098644</b> | <b>complex of collagen trimers</b>                   | 9   | -4.10 |
| <b>GO:0005623</b> | <b>cell</b>                                          | 818 | -4.08 |
| <b>GO:0044464</b> | <b>cell part</b>                                     | 817 | -4.06 |
| <b>GO:0000502</b> | <b>proteasome complex</b>                            | 15  | -3.90 |
| <b>GO:0042641</b> | <b>actomyosin</b>                                    | 12  | -3.74 |
| <b>GO:0005938</b> | <b>cell cortex</b>                                   | 21  | -3.74 |
| <b>GO:0044432</b> | <b>endoplasmic reticulum part</b>                    | 76  | -3.63 |
| <b>GO:0042383</b> | <b>sarcolemma</b>                                    | 12  | -3.26 |
| <b>GO:0031090</b> | <b>organelle membrane</b>                            | 157 | -3.11 |
| <b>GO:0005874</b> | <b>microtubule</b>                                   | 25  | -3.04 |
| <b>GO:0071944</b> | <b>cell periphery</b>                                | 273 | -2.98 |
| <b>GO:0005884</b> | <b>actin filament</b>                                | 12  | -2.63 |
| <b>GO:0036019</b> | <b>endolysosome</b>                                  | 7   | -2.59 |
| <b>GO:0030175</b> | <b>filopodium</b>                                    | 12  | -2.54 |
| <b>GO:0031252</b> | <b>cell leading edge</b>                             | 26  | -2.49 |
| <b>GO:0030529</b> | <b>ribonucleoprotein complex</b>                     | 54  | -2.42 |
| <b>GO:0016469</b> | <b>proton-transporting two-sector ATPase complex</b> | 10  | -2.41 |
| <b>GO:0044455</b> | <b>mitochondrial membrane part</b>                   | 22  | -2.27 |
| <b>GO:0005886</b> | <b>plasma membrane</b>                               | 265 | -2.21 |
| <b>GO:0001527</b> | <b>microfibril</b>                                   | 5   | -2.15 |
| <b>GO:0042995</b> | <b>cell projection</b>                               | 71  | -1.98 |
| <b>GO:0005768</b> | <b>endosome</b>                                      | 55  | -1.91 |
| <b>GO:0005796</b> | <b>Golgi lumen</b>                                   | 15  | -1.85 |
| <b>GO:0030496</b> | <b>midbody</b>                                       | 16  | -1.83 |
| <b>GO:0031975</b> | <b>envelope</b>                                      | 67  | -1.80 |
| <b>GO:0001726</b> | <b>ruffle</b>                                        | 15  | -1.62 |
| <b>GO:0005743</b> | <b>mitochondrial inner membrane</b>                  | 33  | -1.40 |
| <b>GO:0001772</b> | <b>immunological synapse</b>                         | 7   | -1.39 |

\* Bonferroni corrected p-value

**Supplemental Table 3a. Human Distal Aortic Protein GO Terms: Biologic Process (top 100 GO Terms)**

| <u>GO Term ID</u> | <u>Description</u>                                     | <u># of proteins</u> | <u>log(p-value)*</u> |
|-------------------|--------------------------------------------------------|----------------------|----------------------|
| GO:0044699        | single-organism process                                | 619                  | -48.11               |
| GO:0044763        | single-organism cellular process                       | 563                  | -36.27               |
| GO:0016192        | vesicle-mediated transport                             | 153                  | -35.49               |
| GO:0071840        | cellular component organization or biogenesis          | 341                  | -33.98               |
| GO:0030198        | extracellular matrix organization                      | 65                   | -31.62               |
| GO:0043062        | extracellular structure organization                   | 65                   | -31.50               |
| GO:0009987        | cellular process                                       | 627                  | -30.47               |
| GO:0065008        | regulation of biological quality                       | 217                  | -29.55               |
| GO:0006897        | endocytosis                                            | 91                   | -28.49               |
| GO:0009611        | response to wounding                                   | 93                   | -27.77               |
| GO:0051179        | localization                                           | 312                  | -27.74               |
| GO:0044710        | single-organism metabolic process                      | 305                  | -27.74               |
| GO:0051234        | establishment of localization                          | 273                  | -27.69               |
| GO:0044707        | single-multicellular organism process                  | 269                  | -25.07               |
| GO:0072376        | protein activation cascade                             | 53                   | -24.66               |
| GO:0050896        | response to stimulus                                   | 394                  | -24.21               |
| GO:0006950        | response to stress                                     | 227                  | -23.16               |
| GO:0009056        | catabolic process                                      | 166                  | -22.89               |
| GO:0022607        | cellular component assembly                            | 168                  | -22.02               |
| GO:0032501        | multicellular organismal process                       | 299                  | -21.59               |
| GO:0042060        | wound healing                                          | 66                   | -20.86               |
| GO:0002576        | platelet degranulation                                 | 35                   | -20.30               |
| GO:0051128        | regulation of cellular component organization          | 154                  | -19.28               |
| GO:0002253        | activation of immune response                          | 79                   | -18.96               |
| GO:0050817        | coagulation                                            | 55                   | -18.75               |
| GO:0044085        | cellular component biogenesis                          | 172                  | -18.56               |
| GO:0006956        | complement activation                                  | 44                   | -18.46               |
| GO:0071822        | protein complex subunit organization                   | 132                  | -18.41               |
| GO:0030029        | actin filament-based process                           | 70                   | -18.28               |
| GO:0050778        | positive regulation of immune response                 | 84                   | -17.99               |
| GO:0048518        | positive regulation of biological process              | 284                  | -17.96               |
| GO:0044767        | single-organism developmental process                  | 237                  | -17.90               |
| GO:0032502        | developmental process                                  | 241                  | -17.11               |
| GO:0002376        | immune system process                                  | 164                  | -16.96               |
| GO:0072524        | pyridine-containing compound metabolic process         | 32                   | -16.94               |
| GO:0048584        | positive regulation of response to stimulus            | 146                  | -16.83               |
| GO:0022610        | biological adhesion                                    | 102                  | -16.71               |
| GO:0006959        | humoral immune response                                | 52                   | -16.68               |
| GO:0007155        | cell adhesion                                          | 101                  | -16.42               |
| GO:0065007        | biological regulation                                  | 470                  | -16.36               |
| GO:0050878        | regulation of body fluid levels                        | 58                   | -16.28               |
| GO:0006457        | protein folding                                        | 38                   | -15.70               |
| GO:0050789        | regulation of biological process                       | 450                  | -15.68               |
| GO:0046496        | nicotinamide nucleotide metabolic process              | 29                   | -15.42               |
| GO:0008152        | metabolic process                                      | 464                  | -15.20               |
| GO:0007010        | cytoskeleton organization                              | 87                   | -14.69               |
| GO:0034446        | substrate adhesion-dependent cell spreading            | 24                   | -14.53               |
| GO:0061621        | canonical glycolysis                                   | 17                   | -14.49               |
| GO:0048583        | regulation of response to stimulus                     | 216                  | -14.37               |
| GO:0006909        | phagocytosis                                           | 49                   | -14.10               |
| GO:0051130        | positive regulation of cellular component organization | 89                   | -13.45               |

|            |                                                      |     |        |
|------------|------------------------------------------------------|-----|--------|
| GO:0002673 | regulation of acute inflammatory response            | 22  | -13.44 |
| GO:0080134 | regulation of response to stress                     | 111 | -13.32 |
| GO:0030036 | actin cytoskeleton organization                      | 56  | -13.31 |
| GO:0002252 | immune effector process                              | 78  | -13.28 |
| GO:0002526 | acute inflammatory response                          | 25  | -13.27 |
| GO:0032879 | regulation of localization                           | 142 | -13.25 |
| GO:0002682 | regulation of immune system process                  | 114 | -12.82 |
| GO:0030162 | regulation of proteolysis                            | 68  | -12.73 |
| GO:0055114 | oxidation-reduction process                          | 58  | -12.73 |
| GO:0006928 | cellular component movement                          | 113 | -12.60 |
| GO:0051641 | cellular localization                                | 167 | -12.51 |
| GO:0009605 | response to external stimulus                        | 121 | -12.35 |
| GO:0048522 | positive regulation of cellular process              | 233 | -12.27 |
| GO:0044281 | small molecule metabolic process                     | 132 | -12.26 |
| GO:0048519 | negative regulation of biological process            | 225 | -12.14 |
| GO:1901564 | organonitrogen compound metabolic process            | 146 | -11.89 |
| GO:0006955 | immune response                                      | 116 | -11.72 |
| GO:0006508 | proteolysis                                          | 110 | -11.63 |
| GO:0071704 | organic substance metabolic process                  | 428 | -11.53 |
| GO:0043086 | negative regulation of catalytic activity            | 71  | -11.48 |
| GO:0006165 | nucleoside diphosphate phosphorylation               | 21  | -11.30 |
| GO:0003012 | muscle system process                                | 44  | -11.18 |
| GO:0033036 | macromolecule localization                           | 141 | -10.70 |
| GO:0051246 | regulation of protein metabolic process              | 149 | -10.69 |
| GO:0046939 | nucleotide phosphorylation                           | 21  | -10.65 |
| GO:0006952 | defense response                                     | 105 | -10.41 |
| GO:0034329 | cell junction assembly                               | 31  | -10.36 |
| GO:0006796 | phosphate-containing compound metabolic process      | 166 | -10.31 |
| GO:0006082 | organic acid metabolic process                       | 81  | -10.23 |
| GO:0008104 | protein localization                                 | 125 | -10.21 |
| GO:0032101 | regulation of response to external stimulus          | 74  | -10.17 |
| GO:0042221 | response to chemical                                 | 192 | -10.11 |
| GO:0010941 | regulation of cell death                             | 92  | -10.08 |
| GO:0019752 | carboxylic acid metabolic process                    | 74  | -9.90  |
| GO:0009205 | purine ribonucleoside triphosphate metabolic process | 34  | -9.73  |
| GO:0044092 | negative regulation of molecular function            | 80  | -9.69  |
| GO:0016052 | carbohydrate catabolic process                       | 26  | -9.64  |
| GO:0009888 | tissue development                                   | 91  | -9.63  |
| GO:0050794 | regulation of cellular process                       | 408 | -9.60  |
| GO:0034330 | cell junction organization                           | 34  | -9.47  |
| GO:0006793 | phosphorus metabolic process                         | 166 | -9.44  |
| GO:0021762 | substantia nigra development                         | 17  | -9.42  |
| GO:0051716 | cellular response to stimulus                        | 308 | -9.32  |
| GO:0070887 | cellular response to chemical stimulus               | 143 | -9.31  |
| GO:0046907 | intracellular transport                              | 123 | -9.31  |
| GO:0051604 | protein maturation                                   | 40  | -9.17  |
| GO:0065009 | regulation of molecular function                     | 152 | -9.02  |
| GO:0009132 | nucleoside diphosphate metabolic process             | 21  | -8.86  |
| GO:0061024 | membrane organization                                | 80  | -8.81  |

\* Bonferroni corrected p-value

**Supplemental Table 3b Human Distal Aortic Protein GO Terms: Molecular Function (adj. p-value < 0.05\*)**

| <u>GO Term ID</u> | <u>Description</u>                                                                    | <u># of proteins</u> | <u>log(p-value)*</u> |
|-------------------|---------------------------------------------------------------------------------------|----------------------|----------------------|
| GO:0005515        | protein binding                                                                       | 583                  | -55.54               |
| GO:0005488        | binding                                                                               | 622                  | -50.52               |
| GO:0032403        | protein complex binding                                                               | 88                   | -24.65               |
| GO:0005198        | structural molecule activity                                                          | 82                   | -24.37               |
| GO:0008092        | cytoskeletal protein binding                                                          | 78                   | -23.01               |
| GO:0044822        | poly(A) RNA binding                                                                   | 124                  | -22.28               |
| GO:0043167        | ion binding                                                                           | 133                  | -19.83               |
| GO:0003723        | RNA binding                                                                           | 132                  | -19.13               |
| GO:0003779        | actin binding                                                                         | 40                   | -15.67               |
| GO:0097367        | carbohydrate derivative binding                                                       | 73                   | -15.32               |
| GO:0043168        | anion binding                                                                         | 88                   | -13.33               |
| GO:0097159        | organic cyclic compound binding                                                       | 202                  | -13.19               |
| GO:0005201        | extracellular matrix structural constituent                                           | 22                   | -12.89               |
| GO:0019899        | enzyme binding                                                                        | 116                  | -12.87               |
| GO:0005200        | structural constituent of cytoskeleton                                                | 23                   | -12.12               |
| GO:0004857        | enzyme inhibitor activity                                                             | 42                   | -11.07               |
| GO:1901363        | heterocyclic compound binding                                                         | 191                  | -10.72               |
| GO:0005102        | receptor binding                                                                      | 95                   | -10.09               |
| GO:0005539        | glycosaminoglycan binding                                                             | 25                   | -9.33                |
| GO:0042802        | identical protein binding                                                             | 82                   | -8.64                |
| GO:0016616        | oxidoreductase activity, acting on the CH-OH group of donors, NAD or NADP as acceptor | 22                   | -8.62                |
| GO:0030234        | enzyme regulator activity                                                             | 67                   | -8.46                |
| GO:0003824        | catalytic activity                                                                    | 252                  | -8.28                |
| GO:0050839        | cell adhesion molecule binding                                                        | 27                   | -8.14                |
| GO:0036094        | small molecule binding                                                                | 63                   | -8.00                |
| GO:0043169        | cation binding                                                                        | 67                   | -7.86                |
| GO:0046872        | metal ion binding                                                                     | 62                   | -7.49                |
| GO:0016614        | oxidoreductase activity, acting on CH-OH group of donors                              | 22                   | -7.44                |
| GO:0016209        | antioxidant activity                                                                  | 16                   | -7.42                |
| GO:0034987        | immunoglobulin receptor binding                                                       | 12                   | -7.41                |
| GO:0016787        | hydrolase activity                                                                    | 125                  | -6.60                |
| GO:0016491        | oxidoreductase activity                                                               | 52                   | -6.36                |
| GO:0003924        | GTPase activity                                                                       | 24                   | -5.80                |
| GO:0004866        | endopeptidase inhibitor activity                                                      | 20                   | -5.73                |
| GO:0008289        | lipid binding                                                                         | 43                   | -5.68                |
| GO:0044548        | S100 protein binding                                                                  | 8                    | -5.64                |
| GO:0005178        | integrin binding                                                                      | 17                   | -5.56                |
| GO:0004175        | endopeptidase activity                                                                | 43                   | -5.41                |
| GO:1901681        | sulfur compound binding                                                               | 21                   | -5.15                |
| GO:0003676        | nucleic acid binding                                                                  | 147                  | -4.95                |
| GO:0005518        | collagen binding                                                                      | 13                   | -4.86                |
| GO:0019901        | protein kinase binding                                                                | 39                   | -4.80                |
| GO:0016817        | hydrolase activity, acting on acid anhydrides                                         | 51                   | -4.75                |
| GO:0008201        | heparin binding                                                                       | 16                   | -4.71                |
| GO:0051082        | unfolded protein binding                                                              | 14                   | -4.65                |
| GO:0048306        | calcium-dependent protein binding                                                     | 12                   | -4.57                |
| GO:0051920        | peroxiredoxin activity                                                                | 5                    | -4.38                |
| GO:0001948        | glycoprotein binding                                                                  | 14                   | -4.19                |
| GO:0016835        | carbon-oxygen lyase activity                                                          | 13                   | -4.03                |
| GO:0005509        | calcium ion binding                                                                   | 27                   | -4.02                |
| GO:0005496        | steroid binding                                                                       | 14                   | -4.02                |
| GO:0001848        | complement binding                                                                    | 7                    | -3.81                |
| GO:0016684        | oxidoreductase activity, acting on peroxide as acceptor                               | 10                   | -3.78                |
| GO:1901265        | nucleoside phosphate binding                                                          | 42                   | -3.56                |

|            |                                                                 |    |       |
|------------|-----------------------------------------------------------------|----|-------|
| GO:0032561 | guanyl ribonucleotide binding                                   | 18 | -3.45 |
| GO:0019001 | guanyl nucleotide binding                                       | 18 | -3.40 |
| GO:0046914 | transition metal ion binding                                    | 33 | -3.25 |
| GO:0008233 | peptidase activity                                              | 47 | -3.22 |
| GO:0017171 | serine hydrolase activity                                       | 31 | -3.20 |
| GO:0008307 | structural constituent of muscle                                | 10 | -3.17 |
| GO:0001882 | nucleoside binding                                              | 33 | -3.03 |
| GO:0016829 | lyase activity                                                  | 18 | -2.94 |
| GO:0046983 | protein dimerization activity                                   | 52 | -2.88 |
| GO:0070325 | lipoprotein particle receptor binding                           | 7  | -2.71 |
| GO:0016853 | isomerase activity                                              | 17 | -2.69 |
| GO:0031625 | ubiquitin protein ligase binding                                | 25 | -2.67 |
| GO:0048037 | cofactor binding                                                | 17 | -2.64 |
| GO:0044389 | small conjugating protein ligase binding                        | 25 | -2.58 |
| GO:0019003 | GDP binding                                                     | 10 | -2.56 |
| GO:0015485 | cholesterol binding                                             | 9  | -2.53 |
| GO:0042803 | protein homodimerization activity                               | 43 | -2.45 |
| GO:0043178 | alcohol binding                                                 | 12 | -2.32 |
| GO:0044325 | ion channel binding                                             | 13 | -2.01 |
| GO:0023026 | MHC class II protein complex binding                            | 6  | -1.87 |
| GO:0060228 | phosphatidylcholine-sterol O-acyltransferase activator activity | 4  | -1.80 |
| GO:0097493 | structural molecule activity conferring elasticity              | 4  | -1.80 |
| GO:0001846 | opsonin binding                                                 | 5  | -1.80 |
| GO:0044183 | protein binding involved in protein folding                     | 5  | -1.80 |
| GO:0048407 | platelet-derived growth factor binding                          | 5  | -1.80 |
| GO:0005507 | copper ion binding                                              | 8  | -1.70 |
| GO:0017127 | cholesterol transporter activity                                | 5  | -1.58 |
| GO:0003823 | antigen binding                                                 | 26 | -1.58 |
| GO:0008426 | protein kinase C inhibitor activity                             | 3  | -1.52 |
| GO:0070653 | high-density lipoprotein particle receptor binding              | 3  | -1.52 |
| GO:0050998 | nitric-oxide synthase binding                                   | 4  | -1.44 |
| GO:0023023 | MHC protein complex binding                                     | 6  | -1.42 |
| GO:0016860 | intramolecular oxidoreductase activity                          | 8  | -1.34 |
| GO:0019843 | rRNA binding                                                    | 8  | -1.34 |

\* Bonferroni corrected p-value

**Supplemental Table 3c. Human Distal Aortic Protein GO Terms: Cellular Component (adj. p-value < 0.05\*)**

| <u>GO Term ID</u> | <u>Description</u>                   | <u># of proteins</u> | <u>log(p-value)*</u> |
|-------------------|--------------------------------------|----------------------|----------------------|
| GO:0070062        | extracellular vesicular exosome      | 527                  | -290.88              |
| GO:0031982        | vesicle                              | 542                  | -260.54              |
| GO:0005576        | extracellular region                 | 566                  | -257.72              |
| GO:0005925        | focal adhesion                       | 133                  | -90.24               |
| GO:0072562        | blood microparticle                  | 85                   | -71.70               |
| GO:0030054        | cell junction                        | 145                  | -61.99               |
| GO:0044444        | cytoplasmic part                     | 491                  | -61.48               |
| GO:0031012        | extracellular matrix                 | 87                   | -58.30               |
| GO:0005829        | cytosol                              | 289                  | -54.61               |
| GO:0043226        | organelle                            | 654                  | -52.71               |
| GO:0043227        | membrane-bounded organelle           | 631                  | -50.45               |
| GO:0005737        | cytoplasm                            | 548                  | -40.32               |
| GO:0015629        | actin cytoskeleton                   | 76                   | -29.42               |
| GO:0005856        | cytoskeleton                         | 149                  | -26.01               |
|                   | cytoplasmic membrane-bounded vesicle |                      |                      |
| GO:0060205        | lumen                                | 37                   | -24.40               |
| GO:0031983        | vesicle lumen                        | 37                   | -24.22               |
| GO:0005578        | proteinaceous extracellular matrix   | 41                   | -22.83               |
| GO:0032991        | macromolecular complex               | 250                  | -17.78               |
| GO:0005788        | endoplasmic reticulum lumen          | 37                   | -15.26               |
| GO:0043228        | non-membrane-bounded organelle       | 214                  | -15.03               |
| GO:0044433        | cytoplasmic vesicle part             | 62                   | -13.77               |
| GO:0043234        | protein complex                      | 210                  | -13.72               |
| GO:0016020        | membrane                             | 370                  | -13.17               |
| GO:0031091        | platelet alpha granule               | 23                   | -12.06               |
| GO:0045121        | membrane raft                        | 31                   | -11.05               |
| GO:0044449        | contractile fiber part               | 27                   | -10.63               |
| GO:0044424        | intracellular part                   | 587                  | -10.34               |
| GO:0043292        | contractile fiber                    | 27                   | -9.83                |
| GO:0005622        | intracellular                        | 591                  | -9.44                |
| GO:0044437        | vacuolar part                        | 60                   | -8.97                |
| GO:0005885        | Arp2/3 protein complex               | 8                    | -8.76                |
| GO:0005773        | vacuole                              | 81                   | -8.73                |
| GO:0044422        | organelle part                       | 399                  | -8.62                |
| GO:0005581        | collagen trimer                      | 13                   | -8.35                |
| GO:0012505        | endomembrane system                  | 192                  | -8.34                |
| GO:0034358        | plasma lipoprotein particle          | 11                   | -7.38                |
| GO:0044446        | intracellular organelle part         | 387                  | -7.24                |
| GO:0009986        | cell surface                         | 55                   | -7.05                |
| GO:0032994        | protein-lipid complex                | 11                   | -6.86                |
| GO:0042571        | immunoglobulin complex, circulating  | 11                   | -6.86                |
| GO:0098589        | membrane region                      | 53                   | -6.82                |
| GO:0048471        | perinuclear region of cytoplasm      | 40                   | -6.76                |
| GO:0098644        | complex of collagen trimers          | 10                   | -6.51                |
| GO:0005832        | chaperonin-containing T-complex      | 7                    | -6.44                |
| GO:0019814        | immunoglobulin complex               | 11                   | -6.40                |
| GO:0042383        | sarcolemma                           | 13                   | -5.30                |
| GO:0044448        | cell cortex part                     | 16                   | -5.21                |
| GO:0009897        | external side of plasma membrane     | 21                   | -5.11                |
| GO:0098552        | side of membrane                     | 38                   | -4.85                |
| GO:0001725        | stress fiber                         | 11                   | -4.80                |
| GO:0005884        | actin filament                       | 13                   | -4.72                |
| GO:0032432        | actin filament bundle                | 11                   | -4.66                |
| GO:0071944        | cell periphery                       | 228                  | -4.54                |
| GO:0043229        | intracellular organelle              | 492                  | -4.40                |
| GO:0042995        | cell projection                      | 66                   | -4.36                |
| GO:0044853        | plasma membrane raft                 | 13                   | -4.31                |

|                   |                                                 |     |       |
|-------------------|-------------------------------------------------|-----|-------|
| <b>GO:0005811</b> | <b>lipid particle</b>                           | 12  | -4.09 |
| <b>GO:0005577</b> | <b>fibrinogen complex</b>                       | 6   | -4.01 |
| <b>GO:0042641</b> | <b>actomyosin</b>                               | 11  | -4.01 |
| <b>GO:0005874</b> | <b>microtubule</b>                              | 23  | -3.96 |
| <b>GO:0044445</b> | <b>cytosolic part</b>                           | 25  | -3.91 |
| <b>GO:0005886</b> | <b>plasma membrane</b>                          | 221 | -3.64 |
| <b>GO:0031252</b> | <b>cell leading edge</b>                        | 24  | -3.54 |
| <b>GO:0005938</b> | <b>cell cortex</b>                              | 18  | -3.53 |
| <b>GO:0005768</b> | <b>endosome</b>                                 | 49  | -3.01 |
| <b>GO:0005783</b> | <b>endoplasmic reticulum</b>                    | 85  | -2.95 |
| <b>GO:0001527</b> | <b>microfibril</b>                              | 5   | -2.75 |
| <b>GO:0044464</b> | <b>cell part</b>                                | 635 | -2.69 |
| <b>GO:0005623</b> | <b>cell</b>                                     | 635 | -2.58 |
| <b>GO:0005796</b> | <b>Golgi lumen</b>                              | 14  | -2.50 |
| <b>GO:0045259</b> | <b>proton-transporting ATP synthase complex</b> | 7   | -2.46 |
| <b>GO:0001726</b> | <b>ruffle</b>                                   | 14  | -2.33 |
| <b>GO:0005769</b> | <b>early endosome</b>                           | 25  | -2.23 |
| <b>GO:0001772</b> | <b>immunological synapse</b>                    | 7   | -2.16 |
| <b>GO:0044432</b> | <b>endoplasmic reticulum part</b>               | 60  | -2.10 |
| <b>GO:0098643</b> | <b>banded collagen fibril</b>                   | 5   | -1.88 |
| <b>GO:0005882</b> | <b>intermediate filament</b>                    | 9   | -1.69 |
| <b>GO:0031838</b> | <b>haptoglobin-hemoglobin complex</b>           | 3   | -1.60 |
| <b>GO:0030904</b> | <b>retromer complex</b>                         | 6   | -1.37 |

\* Bonferroni corrected p-value



**Supplemental Table 4. Enriched Ingenuity Canonical Pathways Among 944 Human LAD Proteins (FDR<0.001)**

|                                                                       | -log(B-H p-value) |                                                      | -log(B-H p-value) |
|-----------------------------------------------------------------------|-------------------|------------------------------------------------------|-------------------|
| Acute Phase Response Signaling                                        | 23.60             | α-Adrenergic Signaling                               | 5.21              |
| LXR/RXR Activation                                                    | 22.00             | ERK/MAPK Signaling                                   | 4.90              |
| Complement System                                                     | 19.00             | Regulation of Cellular Mechanics by Calpain Protease | 4.76              |
| Clathrin-mediated Endocytosis Signaling                               | 17.80             | Protein Kinase A Signaling                           | 4.71              |
| FXR/RXR Activation                                                    | 16.80             | Noradrenaline and Adrenaline Degradation             | 4.64              |
| Integrin Signaling                                                    | 16.40             | Phospholipase C Signaling                            | 4.57              |
| Mitochondrial Dysfunction                                             | 14.20             | HIPPO signaling                                      | 4.57              |
| Glycolysis I                                                          | 13.60             | Dopamine Receptor Signaling                          | 4.46              |
| Actin Cytoskeleton Signaling                                          | 13.50             | Paxillin Signaling                                   | 4.38              |
| RhoGDI Signaling                                                      | 13.00             | Extrinsic Prothrombin Activation Pathway             | 4.36              |
| Signaling by Rho Family GTPases                                       | 11.90             | IL-12 Signaling and Production in Macrophages        | 4.34              |
| RhoA Signaling                                                        | 11.60             | Breast Cancer Regulation by Stathmin1                | 4.31              |
| Regulation of Actin-based Motility by Rho                             | 11.00             | PI3K/AKT Signaling                                   | 4.31              |
| Remodeling of Epithelial Adherens Junctions                           | 10.10             | Germ Cell-Sertoli Cell Junction Signaling            | 4.25              |
| Actin Nucleation by ARP-WASP Complex                                  | 9.65              | Glutaryl-CoA Degradation                             | 4.12              |
| NRF2-mediated Oxidative Stress Response                               | 9.21              | EIF2 Signaling                                       | 4.08              |
| Coagulation System                                                    | 9.21              | Glutathione Redox Reactions I                        | 4.00              |
| Gluconeogenesis I                                                     | 9.21              | Superoxide Radicals Degradation                      | 3.98              |
| Atherosclerosis Signaling                                             | 8.53              | IGF-1 Signaling                                      | 3.90              |
| TCA Cycle II (Eukaryotic)                                             | 8.50              | Regulation of eIF4 and p70S6K Signaling              | 3.87              |
| ILK Signaling                                                         | 8.36              | Tryptophan Degradation III (Eukaryotic)              | 3.69              |
| Intrinsic Prothrombin Activation Pathway                              | 7.29              | Isoleucine Degradation I                             | 3.69              |
| Cdc42 Signaling                                                       | 7.28              | CCR3 Signaling in Eosinophils                        | 3.64              |
| Production of Nitric Oxide and Reactive Oxygen Species in Macrophages | 7.28              | Sertoli Cell-Sertoli Cell Junction Signaling         | 3.60              |
| Ephrin Receptor Signaling                                             | 7.10              | Unfolded protein response                            | 3.56              |
| Virus Entry via Endocytic Pathways                                    | 6.88              | Thrombin Signaling                                   | 3.56              |
| Protein Ubiquitination Pathway                                        | 6.87              | PPARα/RXRα Activation                                | 3.45              |
| Huntington's Disease Signaling                                        | 6.59              | Xenobiotic Metabolism Signaling                      | 3.45              |
| Oxidative Phosphorylation                                             | 6.43              | Pentose Phosphate Pathway                            | 3.44              |
| Epithelial Adherens Junction Signaling                                | 6.43              | Role of Tissue Factor in Cancer                      | 3.43              |
| Caveolar-mediated Endocytosis Signaling                               | 6.27              | Ethanol Degradation II                               | 3.36              |
| phagosome maturation                                                  | 6.14              | mTOR Signaling                                       | 3.32              |
| Glycogen Degradation II                                               | 6.02              | GDP-glucose Biosynthesis                             | 3.32              |
| Lipid Antigen Presentation by CD1                                     | 5.99              | Androgen Signaling                                   | 3.30              |
| Agrin Interactions at Neuromuscular Junction                          | 5.90              | Myc Mediated Apoptosis Signaling                     | 3.24              |
| Rac Signaling                                                         | 5.89              | Methylglyoxal Degradation III                        | 3.23              |
| G Beta Gamma Signaling                                                | 5.63              | Neuroprotective Role of THOP1 in Alzheimer's Disease | 3.22              |
| fMLP Signaling in Neutrophils                                         | 5.63              | Glutathione-mediated Detoxification                  | 3.21              |
| CDK5 Signaling                                                        | 5.59              | Axonal Guidance Signaling                            | 3.16              |
| p70S6K Signaling                                                      | 5.58              | Synaptic Long Term Potentiation                      | 3.06              |
| Ephrin B Signaling                                                    | 5.42              | 14-3-3-mediated Signaling                            | 3.06              |
| Glycogen Degradation III                                              | 5.34              | Semaphorin Signaling in Neurons                      | 3.02              |
| Fcγ Receptor-mediated Phagocytosis in Macrophages and Monocytes       | 5.31              | Glucose and Glucose-1-phosphate Degradation          | 3.02              |
|                                                                       |                   | Aspartate Degradation II                             | 3.02              |

**Supplemental Table 5. Enriched Ingenuity Canonical Pathways among 725 Human Distal Aortic Proteins (FDR<0.001)**

|                                                                       | -log(B-H p-value) |                                                      | -log(B-H p-value) |
|-----------------------------------------------------------------------|-------------------|------------------------------------------------------|-------------------|
| Acute Phase Response Signaling                                        | 22.80             | IGF-1 Signaling                                      | 5.26              |
| LXR/RXR Activation                                                    | 20.90             | Phospholipase C Signaling                            | 5.26              |
| Integrin Signaling                                                    | 19.90             | Axonal Guidance Signaling                            | 5.16              |
|                                                                       |                   | Extrinsic Prothrombin Activation Pathway             | 5.12              |
| Complement System                                                     | 18.60             | Huntington's Disease Signaling                       | 4.93              |
| Clathrin-mediated Endocytosis Signaling                               | 18.00             | Germ Cell-Sertoli Cell Junction Signaling            | 4.87              |
| FXR/RXR Activation                                                    | 16.80             | Glutaryl-CoA Degradation                             | 4.78              |
| Actin Cytoskeleton Signaling                                          | 16.80             | Glycogen Degradation III                             | 4.78              |
| RhoGDI Signaling                                                      | 15.80             | Thrombin Signaling                                   | 4.78              |
| Glycolysis I                                                          | 15.50             | Noradrenaline and Adrenaline Degradation             | 4.73              |
| Signaling by Rho Family GTPases                                       | 14.40             | Breast Cancer Regulation by Stathmin1                | 4.68              |
| RhoA Signaling                                                        | 13.70             | Ephrin B Signaling                                   | 4.68              |
| Regulation of Actin-based Motility by Rho                             | 13.60             | Protein Ubiquitination Pathway                       | 4.57              |
| Gluconeogenesis I                                                     | 12.00             | Tryptophan Degradation III (Eukaryotic)              | 4.43              |
| Actin Nucleation by ARP-WASP Complex                                  | 11.70             | Aggrin Interactions at Neuromuscular Junction        | 4.34              |
| Remodeling of Epithelial Adherens Junctions                           | 11.30             | 14-3-3-mediated Signaling                            | 4.33              |
| Intrinsic Prothrombin Activation Pathway                              | 9.84              | Sertoli Cell-Sertoli Cell Junction Signaling         | 4.26              |
| ILK Signaling                                                         | 9.81              | IL-12 Signaling and Production in Macrophages        | 4.26              |
| Caveolar-mediated Endocytosis Signaling                               | 9.71              | Neuroprotective Role of THOP1 in Alzheimer's Disease | 4.05              |
| Coagulation System                                                    | 8.42              | Hepatic Fibrosis / Hepatic Stellate Cell Activation  | 3.99              |
| Epithelial Adherens Junction Signaling                                | 7.88              | Pentose Phosphate Pathway                            | 3.99              |
| Atherosclerosis Signaling                                             | 7.87              | FAK Signaling                                        | 3.94              |
| Ephrin Receptor Signaling                                             | 7.61              | Lipid Antigen Presentation by CD1                    | 3.90              |
| Cdc42 Signaling                                                       | 7.36              |                                                      |                   |
| Production of Nitric Oxide and Reactive Oxygen Species in Macrophages | 7.27              | CCR3 Signaling in Eosinophils                        | 3.89              |
| Virus Entry via Endocytic Pathways                                    | 7.16              | Unfolded protein response                            | 3.85              |
| phagosome maturation                                                  | 6.64              | Role of Tissue Factor in Cancer                      | 3.56              |
| G Beta Gamma Signaling                                                | 6.45              | Myc Mediated Apoptosis Signaling                     | 3.51              |
| ERK/MAPK Signaling                                                    | 6.34              | Androgen Signaling                                   | 3.44              |
| Rac Signaling                                                         | 6.18              | Cellular Effects of Sildenafil (Viagra)              | 3.44              |
| p70S6K Signaling                                                      | 5.97              | Ethanol Degradation II                               | 3.26              |
| fMLP Signaling in Neutrophils                                         | 5.96              | ERK5 Signaling                                       | 3.22              |
| Regulation of Cellular Mechanics by Calpain Protease                  | 5.96              | Isoleucine Degradation I                             | 3.22              |
| PI3K/AKT Signaling                                                    | 5.84              | Synaptic Long Term Potentiation                      | 3.22              |
| CDK5 Signaling                                                        | 5.84              | Semaphorin Signaling in Neurons                      | 3.19              |
| Paxillin Signaling                                                    | 5.84              | Sucrose Degradation V (Mammalian)                    | 3.19              |
| Protein Kinase A Signaling                                            | 5.70              | Superoxide Radicals Degradation                      | 3.19              |
| NRF2-mediated Oxidative Stress Response                               | 5.64              | Cardiac $\beta$ -adrenergic Signaling                | 3.18              |
| Mitochondrial Dysfunction                                             | 5.59              | Dopamine Receptor Signaling                          | 3.17              |
| Fcy Receptor-mediated Phagocytosis in Macrophages and Monocytes       | 5.47              | P2Y Purigenic Receptor Signaling Pathway             | 3.17              |
| Glycogen Degradation II                                               | 5.29              | G $\alpha$ i Signaling                               | 3.10              |
| $\alpha$ -Adrenergic Signaling                                        | 5.28              | eNOS Signaling                                       | 3.09              |
| HIPPO signaling                                                       | 5.28              | Pentose Phosphate Pathway (Oxidative Branch)         | 3.00              |

**Supplemental Table 6. Regression Models of Association Between Individual Proteins and Extent of Surface Area Involved with Fibrous Plaque (FP) or Normal Intima (NL) in Human LAD Arterial Samples (top 100 proteins).** In models of %FP, the r FP% fraction includes fatty streaks (FS) and NML intima. Likewise, in models of % NL, the non-NL fraction includes both FP and FS. Accordingly, we modeled both %FP and %NL separately. We also classified samples into three level ordinal categories of extent of FP and extent of NL and performed ordinal logistic regression (Ord LR). This approach is less statistically powerful, makes fewer distributional assumptions about the measures of extent of disease. In addition, we used MANOVA to jointly model the distribution of %FP, %FS and %NL. P-values and q-values  $\leq 0.05$  are highlighted in green and pink respectively. **Proteins in bold (n=21) are also included in the top 100 AA proteins**

| Uniprot ID | Protein                                     | Gene         | MANOVA (%FP,%FS) |         | GLM (%FP) |         |         | Ord LR (%FP) |         |         | GLM (%NML) |         |         | Ord LR (%NML) |         |         |
|------------|---------------------------------------------|--------------|------------------|---------|-----------|---------|---------|--------------|---------|---------|------------|---------|---------|---------------|---------|---------|
|            |                                             |              | p-value          | q-value | beta      | p-value | q-value | beta         | p-value | q-value | beta       | p-value | q-value | beta          | p-value | q-value |
| P07858     | <b>Cathepsin B</b>                          | <b>CTSB</b>  | 9.3E-09          | 5.5E-06 | 16.5      | 2.4E-08 | 1.0E-05 | -1.9         | 2.2E-05 | 1.5E-02 | -20.1      | 1.0E-08 | 7.4E-06 | 2.3           | 9.8E-06 | 5.8E-03 |
| P24821     | <b>Tenascin</b>                             | <b>TNC</b>   | 2.1E-08          | 6.3E-06 | 2.3       | 1.2E-08 | 1.0E-05 | -0.3         | 7.1E-05 | 2.4E-02 | -2.6       | 9.9E-08 | 3.6E-05 | 0.3           | 2.8E-04 | 4.2E-02 |
| Q15063     | <b>Periostin</b>                            | <b>POSTN</b> | 1.1E-06          | 2.1E-04 | 1.9       | 2.9E-06 | 7.5E-04 | -0.2         | 3.8E-04 | 3.0E-02 | -2.4       | 4.1E-07 | 9.9E-05 | 0.2           | 1.3E-04 | 2.5E-02 |
| P04114     | <b>Apolipoprotein B-100</b>                 | <b>APOB</b>  | 3.5E-06          | 5.3E-04 | 0.6       | 3.1E-05 | 3.7E-03 | -0.1         | 9.3E-04 | 4.5E-02 | -0.9       | 6.6E-07 | 1.2E-04 | 0.1           | 8.0E-04 | 7.9E-02 |
| P07996     | Thrombospondin-1                            | THBS1        | 6.3E-06          | 7.5E-04 | 2.7       | 3.3E-04 | 2.0E-02 | -0.3         | 2.8E-03 | 8.6E-02 | -4.3       | 9.2E-07 | 1.3E-04 | 0.4           | 1.3E-03 | 9.5E-02 |
| P13796     | <b>Plastin-2</b>                            | LCP1         | 1.4E-05          | 1.2E-03 | 6.5       | 3.6E-06 | 7.5E-04 | -0.7         | 2.0E-04 | 3.0E-02 | -6.9       | 4.2E-05 | 3.7E-03 | 0.5           | 9.4E-04 | 7.9E-02 |
| P07339     | <b>Cathepsin D</b>                          | <b>CTSD</b>  | 1.7E-05          | 1.3E-03 | 11.9      | 4.9E-06 | 8.3E-04 | -1.4         | 2.6E-03 | 8.6E-02 | -12.9      | 3.9E-05 | 3.7E-03 | 1.4           | 2.5E-03 | 1.1E-01 |
| Q9UBR2     | <b>Cathepsin Z</b>                          | <b>CTSZ</b>  | 1.3E-05          | 1.2E-03 | 29.6      | 2.0E-05 | 2.7E-03 | -3.9         | 2.2E-04 | 3.0E-02 | -37.3      | 5.0E-06 | 6.0E-04 | 2.7           | 8.7E-04 | 7.9E-02 |
| P50895     | <b>Basal cell adhesion molecule</b>         | <b>BCAM</b>  | 4.4E-04          | 2.2E-02 | -3.3      | 4.3E-02 | 4.0E-01 | 0.6          | 1.6E-02 | 2.3E-01 | 7.0        | 1.9E-04 | 1.4E-02 | -1.0          | 4.1E-05 | 1.2E-02 |
| P40261     | Nicotinamide N-methyltransferase            | NNMT         | 3.1E-04          | 1.7E-02 | 27.3      | 6.3E-05 | 6.6E-03 | -3.7         | 3.0E-04 | 3.0E-02 | -22.6      | 6.5E-03 | 1.2E-01 | 2.2           | 5.8E-03 | 1.2E-01 |
| P13760     | HLA class II HC Ag, DRB1-4 beta             | HLA-DRB1     | 3.0E-04          | 1.7E-02 | 18.2      | 7.5E-05 | 7.0E-03 | -1.9         | 8.4E-04 | 4.5E-02 | -19.2      | 4.7E-04 | 2.6E-02 | 1.5           | 9.0E-03 | 1.5E-01 |
| P40121     | <b>Macrophage-capping protein</b>           | <b>CAPG</b>  | 5.1E-04          | 2.2E-02 | 13.4      | 1.0E-04 | 8.5E-03 | -1.8         | 1.4E-04 | 3.0E-02 | -13.1      | 1.6E-03 | 5.9E-02 | 1.3           | 1.6E-03 | 1.0E-01 |
| O43866     | <b>CD5 antigen-like</b>                     | CD5L         | 5.0E-04          | 2.2E-02 | 11.7      | 1.3E-04 | 9.9E-03 | -1.4         | 4.1E-04 | 3.0E-02 | -12.4      | 6.7E-04 | 3.2E-02 | 0.9           | 6.2E-03 | 1.2E-01 |
| P35442     | <b>Thrombospondin-2</b>                     | <b>THBS2</b> | 8.4E-04          | 2.9E-02 | 2.3       | 3.4E-03 | 1.1E-01 | -0.3         | 8.1E-03 | 1.7E-01 | -3.5       | 1.6E-04 | 1.3E-02 | 0.2           | 1.0E-02 | 1.5E-01 |
| P07998     | Ribonuclease pancreatic                     | RNASE1       | 2.8E-04          | 1.7E-02 | 73.8      | 1.7E-04 | 1.2E-02 | -4.8         | 2.1E-02 | 2.4E-01 | -45.5      | 5.7E-02 | 3.5E-01 | 2.8           | 1.4E-01 | 3.3E-01 |
| O14773     | Tripeptidyl-peptidase 1                     | TPP1         | 7.7E-04          | 2.9E-02 | 20.8      | 1.8E-04 | 1.2E-02 | -3.6         | 3.7E-04 | 3.0E-02 | -16.3      | 1.6E-02 | 2.0E-01 | 1.6           | 1.1E-02 | 1.5E-01 |
| P01871     | <b>Ig mu chain C region</b>                 | IGHM         | 8.3E-04          | 2.9E-02 | 2.2       | 4.6E-04 | 2.3E-02 | -0.2         | 2.7E-03 | 8.6E-02 | -2.7       | 3.7E-04 | 2.4E-02 | 0.2           | 2.8E-03 | 1.1E-01 |
| P22105     | Tenascin-X                                  | TNXC         | 9.1E-04          | 3.0E-02 | 2.4       | 4.6E-04 | 2.3E-02 | -0.3         | 4.9E-04 | 3.0E-02 | -2.9       | 4.3E-04 | 2.6E-02 | 0.2           | 3.4E-03 | 1.1E-01 |
| Q15582     | TGFBI ig-h3                                 | TGFBI        | 4.3E-03          | 9.5E-02 | 2.9       | 1.2E-03 | 5.6E-02 | -0.4         | 4.4E-04 | 3.0E-02 | -3.1       | 3.8E-03 | 8.9E-02 | 0.3           | 3.0E-03 | 1.1E-01 |
| P13667     | Protein disulfide-isomerase A4              | PDIA4        | 1.5E-03          | 4.1E-02 | 16.5      | 4.5E-04 | 2.3E-02 | -1.7         | 3.5E-03 | 1.0E-01 | -18.2      | 1.2E-03 | 5.1E-02 | 1.4           | 4.3E-03 | 1.1E-01 |
| P04004     | <b>Vitronectin</b>                          | <b>VTN</b>   | 2.5E-03          | 6.2E-02 | 3.5       | 2.0E-02 | 3.2E-01 | -0.4         | 3.1E-02 | 2.5E-01 | -6.1       | 5.7E-04 | 3.0E-02 | 0.5           | 1.0E-02 | 1.5E-01 |
| P14618     | Pyruvate kinase PKM                         | PKM          | 1.7E-02          | 1.9E-01 | 3.4       | 6.5E-03 | 1.8E-01 | -0.6         | 9.2E-04 | 4.5E-02 | -3.9       | 8.5E-03 | 1.5E-01 | 0.4           | 3.7E-03 | 1.1E-01 |
| P09960     | Leukotriene A-4 hydrolase                   | LTA4H        | 9.6E-04          | 3.0E-02 | 6.0       | 5.4E-02 | 4.6E-01 | -0.7         | 1.0E-01 | 3.7E-01 | 1.9        | 6.2E-01 | 6.6E-01 | -0.3          | 3.5E-01 | 4.2E-01 |
| P00450     | <b>Ceruloplasmin</b>                        | <b>CP</b>    | 1.1E-03          | 3.2E-02 | 2.6       | 7.9E-03 | 2.0E-01 | -0.4         | 1.1E-02 | 1.9E-01 | -0.5       | 6.7E-01 | 6.8E-01 | 0.0           | 8.2E-01 | 5.7E-01 |
| P04844     | Ribophorin-2                                | RPN2         | 3.7E-03          | 8.4E-02 | 13.8      | 2.8E-03 | 1.0E-01 | -1.7         | 5.2E-03 | 1.4E-01 | -17.7      | 1.1E-03 | 5.1E-02 | 1.5           | 3.0E-03 | 1.1E-01 |
| Q08380     | Galectin-3-binding protein                  | LGALS3BP     | 5.7E-03          | 1.1E-01 | 6.4       | 8.8E-03 | 2.2E-01 | -0.6         | 2.0E-02 | 2.4E-01 | -9.2       | 1.3E-03 | 5.3E-02 | 0.7           | 1.3E-02 | 1.8E-01 |
| P08519     | Apolipoprotein(a)                           | LPA          | 6.5E-03          | 1.2E-01 | 23.3      | 1.5E-02 | 2.7E-01 | -3.0         | 7.8E-03 | 1.7E-01 | -35.8      | 1.5E-03 | 5.6E-02 | 2.8           | 8.0E-03 | 1.4E-01 |
| Q03135     | Caveolin-1                                  | CAV1         | 4.6E-03          | 9.8E-02 | -10.0     | 2.5E-03 | 9.4E-02 | 2.0          | 1.6E-03 | 6.9E-02 | 12.3       | 1.8E-03 | 6.1E-02 | -1.1          | 3.8E-03 | 1.1E-01 |
| P07900     | Heat shock protein HSP 90-alpha             | HSP90AA1     | 1.6E-03          | 4.3E-02 | 1.6       | 1.2E-01 | 6.0E-01 | 0.0          | 8.1E-01 | 6.7E-01 | 1.0        | 4.1E-01 | 5.9E-01 | -0.1          | 1.6E-01 | 3.5E-01 |
| P30153     | PP2A subunit A isoform PR65-alpha           | PPP2R1A      | 2.0E-03          | 5.1E-02 | 0.4       | 8.9E-01 | 8.8E-01 | -0.1         | 8.9E-01 | 6.8E-01 | 7.8        | 3.4E-02 | 2.8E-01 | -0.7          | 3.2E-02 | 2.2E-01 |
| P12955     | Xaa-Pro dipeptidase                         | PEPD         | 6.8E-03          | 1.2E-01 | 32.3      | 2.1E-03 | 9.3E-02 | -3.2         | 9.6E-03 | 1.8E-01 | -35.3      | 4.8E-03 | 1.0E-01 | 2.6           | 1.6E-02 | 1.9E-01 |
| O15511     | Actin-related protein 2/3 complex subunit 5 | ARPC5        | 6.8E-03          | 1.2E-01 | 30.5      | 2.3E-03 | 9.4E-02 | -3.9         | 2.1E-03 | 8.6E-02 | -21.2      | 8.0E-02 | 4.0E-01 | 2.0           | 6.2E-02 | 2.8E-01 |
| P48163     | NADP-dependent malic enzyme                 | ME1          | 9.4E-03          | 1.5E-01 | -5.2      | 2.3E-02 | 3.3E-01 | 0.8          | 4.3E-02 | 2.9E-01 | 8.1        | 2.2E-03 | 7.2E-02 | -1.0          | 3.8E-03 | 1.1E-01 |
| P01023     | <b>Alpha-2-macroglobulin</b>                | <b>A2M</b>   | 9.9E-03          | 1.5E-01 | 1.7       | 3.3E-03 | 1.1E-01 | -0.3         | 2.2E-03 | 8.6E-02 | -1.8       | 6.0E-03 | 1.2E-01 | 0.1           | 2.8E-02 | 2.1E-01 |
| Q8WX93     | Palladin                                    | PALLD        | 2.1E-02          | 2.2E-01 | -2.6      | 9.8E-02 | 5.5E-01 | 0.6          | 1.2E-02 | 2.0E-01 | 4.9        | 6.6E-03 | 1.2E-01 | -0.6          | 2.2E-03 | 1.1E-01 |
| Q6NZ12     | Polymerase I and transcript release factor  | PTRF         | 1.3E-02          | 1.7E-01 | -5.9      | 1.9E-02 | 3.2E-01 | 1.6          | 2.5E-03 | 8.6E-02 | 8.7        | 3.2E-03 | 8.7E-02 | -0.9          | 5.8E-03 | 1.2E-01 |
| O43396     | Thioredoxin-like protein 1                  | TXNL1        | 8.0E-03          | 1.4E-01 | 45.9      | 2.5E-03 | 9.4E-02 | -4.8         | 6.4E-03 | 1.5E-01 | -33.4      | 6.7E-02 | 3.8E-01 | 2.5           | 9.2E-02 | 2.8E-01 |
| P27169     | <b>Serum paraoxonase/arylesterase 1</b>     | <b>PON1</b>  | 1.1E-02          | 1.5E-01 | 6.9       | 2.8E-02 | 3.4E-01 | -0.6         | 8.2E-02 | 3.5E-01 | -11.1      | 2.6E-03 | 7.8E-02 | 1.0           | 3.1E-02 | 2.2E-01 |



|        |                                                 |        |         |         |       |         |         |      |         |         |       |         |         |      |         |         |
|--------|-------------------------------------------------|--------|---------|---------|-------|---------|---------|------|---------|---------|-------|---------|---------|------|---------|---------|
| Q12765 | Utrophin                                        | UTRN   | 1.7E-01 | 4.2E-01 | -4.9  | 4.1E-01 | 7.6E-01 | 1.3  | 1.7E-01 | 4.4E-01 | 12.1  | 8.5E-02 | 4.1E-01 | -1.8 | 1.6E-02 | 1.9E-01 |
| P30048 | Peroxiredoxin III                               | PRDX3  | 4.3E-02 | 2.8E-01 | -13.6 | 2.2E-02 | 3.3E-01 | 1.0  | 2.1E-01 | 4.7E-01 | 16.9  | 1.6E-02 | 2.0E-01 | -1.1 | 1.1E-01 | 3.0E-01 |
| P15088 | Mast cell carboxypeptidase A                    | CPA3   |         |         |       |         |         |      |         |         |       |         |         |      |         |         |
|        |                                                 |        | 1.6E-01 | 4.2E-01 | 6.8   | 1.5E-01 | 6.3E-01 | -1.2 | 4.5E-02 | 2.9E-01 | -10.8 | 5.6E-02 | 3.5E-01 | 1.2  | 1.6E-02 | 1.9E-01 |
| O60888 | Fatty acid synthase                             | FASN   | 4.6E-02 | 2.8E-01 | -7.3  | 1.7E-01 | 6.4E-01 | 1.0  | 1.9E-01 | 4.6E-01 | 14.7  | 1.7E-02 | 2.0E-01 | -1.3 | 2.6E-02 | 2.1E-01 |
| P35555 | Fibrillin-1                                     | FBN1   | 1.0E-01 | 3.7E-01 | 0.9   | 8.2E-02 | 5.3E-01 | -0.2 | 1.7E-02 | 2.3E-01 | -1.3  | 3.3E-02 | 2.8E-01 | 0.1  | 2.4E-02 | 2.1E-01 |
| P17858 | ATP-dependent 6-phosphofructokinase, liver type | PFKL   |         |         |       |         |         |      |         |         |       |         |         |      |         |         |
|        |                                                 |        | 8.3E-02 | 3.3E-01 | 10.1  | 4.4E-02 | 4.0E-01 | -1.6 | 1.7E-02 | 2.3E-01 | -5.6  | 3.5E-01 | 5.6E-01 | 0.4  | 4.0E-01 | 4.5E-01 |
| Q8NBX0 | UV excision repair protein RAD23 homolog A      | RAD23A |         |         |       |         |         |      |         |         |       |         |         |      |         |         |
|        |                                                 |        | 2.5E-01 | 4.5E-01 | 30.5  | 1.0E-01 | 5.5E-01 | -5.0 | 1.7E-02 | 2.3E-01 | -33.8 | 1.3E-01 | 4.3E-01 | 3.2  | 8.5E-02 | 2.8E-01 |



|        |                                                                |          |          |          |        |          |          |       |          |          |        |          |          |       |          |      |
|--------|----------------------------------------------------------------|----------|----------|----------|--------|----------|----------|-------|----------|----------|--------|----------|----------|-------|----------|------|
| Q76070 | Gamma-synuclein                                                | SNCG     | 7.68E-04 | 4.68E-03 | 15.28  | 1.47E-04 | 8.90E-04 | -2.03 | 9.20E-04 | 3.05E-02 | -11.71 | 3.77E-02 | 3.20E-01 | 0.70  | 9.01E-02 | 4.70 |
| P16112 | Aggrecan core protein                                          | ACAN     | 1.49E-04 | 1.28E-03 | -2.93  | 2.28E-04 | 1.27E-03 | 0.52  | 1.35E-03 | 3.05E-02 | 0.59   | 5.97E-01 | 8.16E-01 | -0.01 | 8.66E-01 | 7.92 |
| P00450 | <b>Ceruloplasmin</b>                                           | CP       | 3.74E-04 | 2.69E-03 | 4.15   | 1.68E-04 | 1.00E-03 | -0.28 | 5.32E-02 | 1.25E-01 | -1.73  | 2.66E-01 | 6.54E-01 | 0.07  | 5.15E-01 | 6.93 |
| Q9NR12 | PDZ and LIM domain protein 7                                   | PDLIM7   | 8.75E-04 | 5.05E-03 | -7.92  | 1.77E-04 | 1.04E-03 | 1.01  | 1.99E-03 | 3.64E-02 | 5.53   | 6.18E-02 | 3.84E-01 | -0.52 | 1.85E-02 | 4.19 |
| P19827 | Inter-alpha-trypsin inhibitor heavy chain H1                   | ITH1     | 1.09E-03 | 5.79E-03 | 6.68   | 2.16E-04 | 1.25E-03 | -0.62 | 1.28E-02 | 7.15E-02 | -5.58  | 2.70E-02 | 3.02E-01 | 0.32  | 8.01E-02 | 4.70 |
| P35749 | Myosin-11                                                      | MYH11    | 6.78E-04 | 4.26E-03 | -0.33  | 2.24E-04 | 1.27E-03 | 0.03  | 1.54E-02 | 7.52E-02 | 0.16   | 1.99E-01 | 5.95E-01 | -0.01 | 1.11E-01 | 4.79 |
| P43121 | Cell surface glycoprotein MUC18                                | MCAM     | 2.45E-04 | 1.86E-03 | -3.74  | 4.66E-02 | 7.31E-02 | 0.36  | 1.80E-01 | 2.24E-01 | -4.20  | 1.02E-01 | 4.54E-01 | 0.26  | 1.54E-01 | 5.17 |
| P00740 | Coagulation factor IX                                          | F9       | 4.14E-04 | 2.85E-03 | 11.84  | 2.56E-04 | 1.40E-03 | -0.95 | 2.28E-02 | 8.33E-02 | -14.56 | 1.06E-03 | 5.59E-02 | 0.72  | 3.45E-02 | 4.59 |
| P06312 | Ig kappa chain V-IV region (Fragment)                          | IGKV4-1  | 2.61E-04 | 1.94E-03 | 19.67  | 7.48E-03 | 2.02E-02 | -1.38 | 1.49E-01 | 2.05E-01 | 8.57   | 4.01E-01 | 7.52E-01 | -0.74 | 3.02E-01 | 6.27 |
| Q43707 | Alpha-actinin-4                                                | ACTN4    | 1.07E-03 | 5.75E-03 | -1.23  | 2.70E-04 | 1.46E-03 | 0.13  | 1.13E-02 | 6.76E-02 | 0.72   | 1.31E-01 | 5.04E-01 | -0.04 | 2.07E-01 | 5.91 |
| P12111 | <b>Collagen alpha-3(VI)</b>                                    | COL6A3   | 9.82E-04 | 5.56E-03 | 1.13   | 2.94E-04 | 1.56E-03 | -0.06 | 1.40E-01 | 1.96E-01 | -0.59  | 1.81E-01 | 5.91E-01 | 0.02  | 5.79E-01 | 7.20 |
| P18206 | Vinculin                                                       | VCL      | 1.06E-03 | 5.75E-03 | -2.28  | 3.29E-04 | 1.72E-03 | 0.26  | 7.85E-03 | 6.53E-02 | 1.16   | 1.93E-01 | 5.95E-01 | -0.08 | 2.03E-01 | 5.91 |
| P30613 | Pyruvate kinase PKLR                                           | PKLR     | 1.28E-03 | 6.69E-03 | 65.77  | 6.80E-03 | 1.86E-02 | -4.71 | 1.37E-01 | 1.95E-01 | -      | 3.82E-04 | 4.07E-02 | 5.58  | 3.84E-02 | 4.59 |
| Q96HC4 | PDZ and LIM domain protein 5                                   | PDLIM5   | 4.20E-04 | 2.85E-03 | -6.65  | 1.05E-02 | 2.58E-02 | 1.22  | 6.69E-03 | 6.19E-02 | -3.13  | 3.84E-01 | 7.52E-01 | 0.11  | 6.43E-01 | 7.34 |
| P37837 | Transaldolase                                                  | TALDO1   | 8.79E-04 | 5.05E-03 | 43.34  | 4.24E-04 | 2.19E-03 | -2.18 | 9.85E-02 | 1.66E-01 | -51.49 | 2.34E-03 | 7.80E-02 | 0.58  | 6.33E-01 | 7.33 |
| P01834 | Ig kappa chain C region                                        | IGKC     | 4.33E-04 | 2.85E-03 | 3.37   | 4.14E-03 | 1.27E-02 | -0.22 | 1.33E-01 | 1.91E-01 | 0.75   | 6.48E-01 | 8.31E-01 | -0.12 | 3.17E-01 | 6.29 |
| Q06828 | Fibromodulin                                                   | FMOD     | 5.13E-04 | 3.32E-03 | -5.23  | 3.45E-02 | 5.84E-02 | 0.76  | 5.50E-02 | 1.26E-01 | -4.56  | 1.80E-01 | 5.91E-01 | 0.20  | 4.03E-01 | 6.60 |
| P31146 | <b>Coronin-1A</b>                                              | CORO1A   | 2.53E-03 | 1.24E-02 | 15.69  | 5.55E-04 | 2.82E-03 | -1.05 | 3.97E-02 | 1.07E-01 | -13.97 | 2.70E-02 | 3.02E-01 | 0.49  | 2.78E-01 | 6.12 |
| Q43294 | Transforming growth factor beta-1-induced transcript 1 protein | TGFB111  | 2.70E-03 | 1.31E-02 | -5.48  | 5.90E-04 | 2.95E-03 | 0.44  | 5.06E-02 | 1.21E-01 | 3.81   | 8.70E-02 | 4.31E-01 | -0.24 | 1.31E-01 | 5.04 |
| P39060 | Collagen alpha-1(XVIII) chain                                  | COL18A1  | 2.07E-03 | 1.04E-02 | -5.45  | 6.30E-04 | 3.11E-03 | 0.57  | 2.90E-02 | 9.09E-02 | 2.82   | 2.07E-01 | 5.96E-01 | -0.04 | 8.12E-01 | 7.83 |
| P06727 | Apolipoprotein A-IV                                            | APOA4    | 3.01E-03 | 1.41E-02 | 7.40   | 6.61E-04 | 3.21E-03 | -0.91 | 1.15E-02 | 6.76E-02 | -5.19  | 8.72E-02 | 4.31E-01 | 0.16  | 4.52E-01 | 6.79 |
| P63244 | Guanine nucleotide-Talin-1                                     | GNB2L1   | 2.88E-03 | 1.36E-02 | 28.04  | 6.73E-04 | 3.22E-03 | -2.07 | 6.95E-02 | 1.39E-01 | -26.09 | 2.26E-02 | 3.02E-01 | 0.73  | 3.67E-01 | 6.54 |
| Q9Y490 | Talin-1                                                        | TLN1     | 1.88E-03 | 9.58E-03 | -1.45  | 7.12E-04 | 3.36E-03 | 0.21  | 3.45E-03 | 4.29E-02 | 0.65   | 2.82E-01 | 6.69E-01 | -0.08 | 5.45E-02 | 4.70 |
| P05156 | Complement factor I                                            | CFI      | 7.24E-04 | 4.48E-03 | 17.78  | 1.42E-03 | 5.95E-03 | -0.77 | 2.59E-01 | 2.63E-01 | -1.56  | 8.41E-01 | 8.58E-01 | -0.30 | 5.86E-01 | 7.20 |
| P00488 | <b>Coagulation factor XIII A chain</b>                         | F13A1    | 3.57E-03 | 1.63E-02 | 9.72   | 7.67E-04 | 3.58E-03 | -0.72 | 2.81E-02 | 8.97E-02 | -8.01  | 4.64E-02 | 3.47E-01 | 0.54  | 8.38E-02 | 4.70 |
| P01620 | Ig kappa chain V-III region S1E                                | IGKV3-20 | 8.15E-04 | 4.89E-03 | 12.69  | 4.33E-03 | 1.31E-02 | -0.53 | 3.02E-01 | 2.86E-01 | 1.84   | 7.67E-01 | 8.46E-01 | -0.18 | 6.69E-01 | 7.44 |
| P00736 | <b>Complement C1r subcomponent</b>                             | C1R      | 3.35E-03 | 1.55E-02 | 11.46  | 8.30E-04 | 3.82E-03 | -0.78 | 8.33E-02 | 1.57E-01 | -7.05  | 1.41E-01 | 5.28E-01 | 0.03  | 9.23E-01 | 8.06 |
| Q08431 | Lactadherin                                                    | MFGE8    | 8.32E-04 | 4.92E-03 | -3.70  | 3.63E-03 | 1.20E-02 | 0.43  | 2.02E-02 | 8.04E-02 | -0.37  | 8.36E-01 | 8.58E-01 | -0.01 | 9.32E-01 | 8.06 |
| P59665 | Neutrophil defensin 1                                          | DEFA1    | 1.00E-03 | 5.60E-03 | 28.10  | 9.28E-04 | 4.21E-03 | -3.00 | 1.24E-02 | 7.05E-02 | -6.59  | 5.80E-01 | 8.16E-01 | -0.02 | 9.83E-01 | 8.08 |
| Q14112 | Nidogen-2                                                      | NID2     | 4.44E-03 | 1.94E-02 | 28.59  | 1.04E-03 | 4.66E-03 | -3.01 | 5.49E-03 | 5.45E-02 | -26.02 | 3.14E-02 | 3.10E-01 | 1.73  | 5.85E-02 | 4.70 |
| P50895 | <b>Basal cell adhesion molecule</b>                            | BCAM     | 1.05E-03 | 5.75E-03 | -5.67  | 1.99E-03 | 7.62E-03 | 0.51  | 4.69E-02 | 1.19E-01 | 0.41   | 8.72E-01 | 8.64E-01 | -0.01 | 9.38E-01 | 8.06 |
| Q96PD5 | N-acetylmuramoyl-L-alanine amidase                             | PGLYRP2  | 2.77E-03 | 1.33E-02 | 13.60  | 1.09E-03 | 4.83E-03 | -1.19 | 2.75E-02 | 8.97E-02 | -5.84  | 3.16E-01 | 7.06E-01 | 0.12  | 7.72E-01 | 7.67 |
| P12109 | Collagen alpha-1(VI) chain                                     | COL6A1   | 4.92E-03 | 2.13E-02 | 2.64   | 1.14E-03 | 4.96E-03 | -0.21 | 7.63E-02 | 1.48E-01 | -1.81  | 1.10E-01 | 4.70E-01 | 0.09  | 2.66E-01 | 6.04 |
| Q99497 | Protein deglycase DJ-1                                         | PARK7    | 2.55E-02 | 6.17E-02 | -9.80  | 6.84E-03 | 1.86E-02 | 2.08  | 1.29E-03 | 3.05E-02 | 8.74   | 8.05E-02 | 4.21E-01 | -0.70 | 5.58E-02 | 4.70 |
| P05062 | Fructose-bisphosphate aldolase B                               | ALDOB    | 2.26E-02 | 5.85E-02 | -7.17  | 8.01E-03 | 2.12E-02 | 1.50  | 1.30E-03 | 3.05E-02 | 7.92   | 3.29E-02 | 3.10E-01 | -0.49 | 7.12E-02 | 4.70 |
| Q9BXR6 | Complement factor H-related protein 5                          | CFHR5    | 5.32E-03 | 2.23E-02 | 28.81  | 1.31E-03 | 5.66E-03 | -1.34 | 2.10E-01 | 2.38E-01 | -18.32 | 1.43E-01 | 5.30E-01 | 0.06  | 9.48E-01 | 8.08 |
| Q13361 | Microfibrillar-associated protein 5                            | MFAP5    | 6.17E-03 | 2.45E-02 | 33.64  | 1.41E-03 | 5.95E-03 | -2.13 | 1.08E-01 | 1.72E-01 | -28.59 | 5.05E-02 | 3.51E-01 | -0.71 | 4.89E-01 | 6.91 |
| P46952 | 3-hydroxyanthranilate 3,4-dioxygenase                          | HAAO     | 3.23E-02 | 7.13E-02 | -14.05 | 8.90E-03 | 2.23E-02 | 5.09  | 1.42E-03 | 3.05E-02 | 12.53  | 9.08E-02 | 4.31E-01 | -0.84 | 1.12E-01 | 4.80 |
| P08758 | Annexin A5                                                     | ANXA5    | 5.21E-03 | 2.20E-02 | -6.24  | 1.46E-03 | 6.07E-03 | 0.94  | 6.86E-03 | 6.19E-02 | 3.50   | 2.01E-01 | 5.95E-01 | -0.33 | 9.23E-02 | 4.70 |
| Q13418 | Integrin-linked protein kinase                                 | ILK      | 1.68E-03 | 8.65E-03 | -7.10  | 1.48E-03 | 6.07E-03 | 0.87  | 8.57E-03 | 6.76E-02 | 1.61   | 6.06E-01 | 8.16E-01 | -0.01 | 9.75E-01 | 8.08 |
| P21291 | Cysteine and glycine-rich protein 1                            | CSRP1    | 6.65E-03 | 2.57E-02 | -6.17  | 1.55E-03 | 6.27E-03 | 0.83  | 1.20E-02 | 6.92E-02 | 4.34   | 1.10E-01 | 4.70E-01 | -0.29 | 1.33E-01 | 5.04 |
| P10909 | Clusterin                                                      | CLU      | 6.62E-03 | 2.57E-02 | 6.63   | 1.70E-03 | 6.81E-03 | -0.35 | 1.94E-01 | 2.32E-01 | -6.35  | 2.97E-02 | 3.10E-01 | 0.32  | 1.37E-01 | 5.04 |
| P00738 | Haptoglobin                                                    | HP       | 4.41E-03 | 1.94E-02 | 1.15   | 1.82E-03 | 7.20E-03 | -0.07 | 8.10E-02 | 1.54E-01 | -0.47  | 3.59E-01 | 7.32E-01 | 0.05  | 2.05E-01 | 5.91 |
| Q92747 | Actin-related protein 2/3 complex subunit 1A                   | ARPC1A   | 8.33E-03 | 2.93E-02 | -85.33 | 1.92E-03 | 7.50E-03 | 13.45 | 4.31E-03 | 4.57E-02 | 66.51  | 8.16E-02 | 4.21E-01 | -1.70 | 5.24E-01 | 6.95 |
| P51884 | Lumican                                                        | LUM      | 8.38E-03 | 2.93E-02 | 6.76   | 1.98E-03 | 7.62E-03 | -0.71 | 1.78E-02 | 8.03E-02 | -4.82  | 1.13E-01 | 4.73E-01 | 0.15  | 4.72E-01 | 6.89 |



**Supplemental Table 8. Up-Regulated Proteins in LAD Fibrous Plaque Samples (n=15) Compared with Normal LAD Samples (n=30).** Samples were selected using patho-proteomic phenotyping designed to integrate pathologist assessment of extent of disease and CAM deconvolution of global protein profiles (fold-change = mean FP/ mean NL).

| Uniprot ID | Protein                                                    | Gene     | Fold change | q-value  |
|------------|------------------------------------------------------------|----------|-------------|----------|
| P24821     | Tenascin                                                   | TNC      | 13.04       | 1.08E-03 |
| P07996     | Thrombospondin-1                                           | THBS1    | 10.05       | 2.06E-03 |
| P13796     | Plastin-2                                                  | LCP1     | 3.87        | 9.80E-04 |
| P04114     | Apolipoprotein B-100                                       | APOB     | 3.65        | 6.26E-04 |
| P07858     | Cathepsin B                                                | CTSB     | 3.63        | 3.13E-04 |
| P40121     | Macrophage-capping protein                                 | CAPG     | 2.72        | 6.89E-03 |
| P35442     | Thrombospondin-2                                           | THBS2    | 2.69        | 4.40E-04 |
| P13760     | HLA class II histocompatibility antigen, DRB1-4 beta chain | HLA-DRB1 | 2.57        | 1.02E-02 |
| P05783     | Keratin, type I cytoskeletal 18                            | KRT18    | 2.55        | 4.20E-02 |
| P27169     | Serum paraoxonase/arylesterase 1                           | PON1     | 2.21        | 3.75E-02 |
| Q9UBR2     | Cathepsin Z                                                | CTSZ     | 2.20        | 9.53E-04 |
| P01871     | Ig mu chain C region                                       | IGHM     | 2.15        | 8.14E-03 |
| P31146     | Coronin-1A                                                 | CORO1A   | 2.13        | 1.22E-02 |
| O43866     | CD5 antigen-like                                           | CD5L     | 2.10        | 1.22E-02 |
| P08519     | Apolipoprotein(a)                                          | LPA      | 1.97        | 1.08E-02 |
| Q15063     | Periostin                                                  | POSTN    | 1.94        | 5.47E-04 |
| P01031     | Complement C5                                              | C5       | 1.89        | 1.58E-02 |
| Q15582     | Transforming growth factor-beta-induced protein ig-h3      | TGFBI    | 1.86        | 2.41E-03 |
| P02649     | Apolipoprotein E                                           | APOE     | 1.79        | 1.28E-02 |
| P40261     | Nicotinamide N-methyltransferase                           | NNMT     | 1.74        | 1.08E-02 |
| Q8IUX7     | Adipocyte enhancer-binding protein 1                       | AEBP1    | 1.71        | 4.77E-03 |

**Supplemental Table 9. Down-Regulated Proteins in LAD Fibrous Plaque Samples (n=15) Compared with Normal LAD Samples (n=30).** Samples were selected using patho-proteomic phenotyping designed to integrate pathologist assessment of extent of disease and CAM deconvolution of global protein profiles. (For down regulated proteins Fold-change =  $-1 * \text{mean NL}/\text{mean FP}$ .)

| Uniprot ID | Protein                                                        | Gene    | Fold-change | q-value  |
|------------|----------------------------------------------------------------|---------|-------------|----------|
| P07197     | Neurofilament medium polypeptide                               | NEFM    | -5.70       | 3.42E-02 |
| P49327     | Fatty acid synthase                                            | FASN    | -5.40       | 1.55E-05 |
| P15090     | Fatty acid-binding protein, adipocyte                          | FABP4   | -3.58       | 6.87E-03 |
| P07196     | Neurofilament light polypeptide                                | NEFL    | -3.27       | 2.45E-02 |
| Q96Q06     | Perilipin-4                                                    | PLIN4   | -2.53       | 2.90E-04 |
| P09543     | 2',3'-cyclic-nucleotide 3'-phosphodiesterase                   | CNP     | -2.50       | 2.77E-04 |
| P33121     | Long-chain-fatty-acid--CoA ligase 1                            | ACSL1   | -2.41       | 4.90E-04 |
| P11586     | C-1-tetrahydrofolate synthase, cytoplasmic                     | MTHFD1  | -2.28       | 1.55E-05 |
| O60240     | Perilipin-1                                                    | PLIN1   | -2.24       | 3.13E-04 |
| P22695     | Cytochrome b-c1 complex subunit 2, mitochondrial               | UQCRC2  | -2.19       | 3.13E-04 |
| P23634     | Plasma membrane calcium-transporting ATPase 4                  | ATP2B4  | -2.18       | 2.77E-04 |
| Q68CZ2     | Tensin-3                                                       | TNS3    | -2.17       | 2.22E-03 |
| Q05469     | Hormone-sensitive lipase                                       | LIPE    | -2.16       | 1.36E-03 |
| O43301     | Heat shock 70 kDa protein 12A                                  | HSPA12A | -2.13       | 4.90E-04 |
| Q86TX2     | Acyl-coenzyme A thioesterase 1                                 | ACOT1   | -2.11       | 9.01E-04 |
| Q16363     | Laminin subunit alpha-4                                        | LAMA4   | -2.10       | 4.90E-04 |
| O43175     | D-3-phosphoglycerate dehydrogenase                             | PHGDH   | -2.09       | 2.77E-04 |
| Q16698     | 2,4-dienoyl-CoA reductase, mitochondrial                       | DECR1   | -2.08       | 5.47E-04 |
| P11532     | Dystrophin                                                     | DMD     | -2.07       | 5.47E-04 |
| P16930     | Fumarylacetoacetase                                            | FAH     | -2.05       | 9.53E-04 |
| Q02952     | A-kinase anchor protein 12                                     | AKAP12  | -2.03       | 3.13E-04 |
| Q9UN36     | Protein NDRG2                                                  | NDRG2   | -2.02       | 2.06E-03 |
| Q9HBL0     | Tensin-1                                                       | TNS1    | -2.01       | 5.58E-04 |
| P21695     | Glycerol-3-phosphate dehydrogenase [NAD(+)], cytoplasmic       | GPD1    | -1.99       | 1.96E-04 |
| Q9BSJ8     | Extended synaptotagmin-1                                       | ESYT1   | -1.98       | 1.07E-03 |
| O75112     | LIM domain-binding protein 3                                   | LDB3    | -1.98       | 1.70E-02 |
| P49748     | Very long-chain specific acyl-CoA dehydrogenase, mitochondrial | ACADVL  | -1.96       | 4.41E-04 |
| P53396     | ATP-citrate synthase                                           | ACLY    | -1.95       | 2.06E-03 |
| O95810     | Serum deprivation-response protein                             | SDPR    | -1.95       | 5.67E-04 |
| P48163     | NADP-dependent malic enzyme                                    | ME1     | -1.95       | 3.46E-03 |
| P31323     | cAMP-dependent protein kinase type II-beta regulatory subunit  | PRKAR2B | -1.94       | 2.05E-02 |
| Q99685     | Monoglyceride lipase                                           | MGLL    | -1.94       | 1.55E-03 |
| Q13683     | Integrin alpha-7                                               | ITGA7   | -1.90       | 3.46E-03 |
| Q2UY09     | Collagen alpha-1(XXVIII) chain                                 | COL28A1 | -1.90       | 1.92E-03 |
| P46821     | Microtubule-associated protein 1B                              | MAP1B   | -1.90       | 4.59E-03 |
| Q96JY6     | PDZ and LIM domain protein 2                                   | PDLIM2  | -1.89       | 3.61E-03 |
| O75390     | Citrate synthase, mitochondrial                                | CS      | -1.88       | 1.88E-03 |
| P13804     | Electron transfer flavoprotein subunit alpha, mitochondrial    | ETFA    | -1.87       | 2.77E-04 |
| P21397     | Amine oxidase [flavin-containing] A                            | MAOA    | -1.87       | 5.24E-04 |
| Q6YN16     | Hydroxysteroid dehydrogenase-like protein 2                    | HSDL2   | -1.86       | 5.47E-04 |

|        |                                                                 |         |       |          |
|--------|-----------------------------------------------------------------|---------|-------|----------|
| P31930 | Cytochrome b-c1 complex subunit 1, mitochondrial                | UQCRC1  | -1.86 | 1.10E-03 |
| P23141 | Liver carboxylesterase 1                                        | CES1    | -1.86 | 9.39E-03 |
| Q9BTV4 | Transmembrane protein 43                                        | TMEM43  | -1.84 | 1.08E-03 |
| Q15836 | Vesicle-associated membrane protein 3                           | VAMP3   | -1.82 | 1.86E-03 |
| Q14112 | Nidogen-2                                                       | NID2    | -1.81 | 5.47E-04 |
| Q13011 | Delta(3,5)-Delta(2,4)-dienoyl-CoA isomerase, mitochondrial      | ECH1    | -1.81 | 4.59E-03 |
| Q99798 | Aconitate hydratase, mitochondrial                              | ACO2    | -1.80 | 1.96E-04 |
| P09622 | Dihydrolipoyl dehydrogenase, mitochondrial                      | DLD     | -1.80 | 3.88E-04 |
| P11177 | Pyruvate dehydrogenase E1 component subunit beta, mitochondrial | PDHB    | -1.80 | 1.08E-03 |
| P14854 | Cytochrome c oxidase subunit 6B1                                | COX6B1  | -1.79 | 6.94E-04 |
| Q96AM1 | Mas-related G-protein coupled receptor member F                 | MRGPRF  | -1.79 | 7.86E-03 |
| P17540 | Creatine kinase S-type, mitochondrial                           | CKMT2   | -1.79 | 4.43E-02 |
| P35611 | Alpha-adducin                                                   | ADD1    | -1.78 | 2.15E-03 |
| P07451 | Carbonic anhydrase 3                                            | CA3     | -1.78 | 1.08E-02 |
| P27816 | Microtubule-associated protein 4                                | MAP4    | -1.78 | 1.28E-02 |
| P06737 | Glycogen phosphorylase, liver form                              | PYGL    | -1.78 | 2.34E-02 |
| Q02218 | 2-oxoglutarate dehydrogenase, mitochondrial                     | OGDH    | -1.77 | 1.24E-02 |
| P07099 | Epoxide hydrolase 1                                             | EPHX1   | -1.77 | 4.10E-02 |
| Q9UHD8 | Septin-9                                                        | SEP9    | -1.76 | 1.68E-03 |
| P50213 | Isocitrate dehydrogenase [NAD] subunit alpha, mitochondrial     | IDH3A   | -1.74 | 5.06E-03 |
| P10620 | Microsomal glutathione S-transferase 1                          | MGST1   | -1.73 | 2.06E-03 |
| Q16891 | MICOS complex subunit MIC60                                     | IMMT    | -1.72 | 2.88E-03 |
| P51911 | Calponin-1                                                      | CNN1    | -1.71 | 1.88E-03 |
| Q6PCB0 | von Willebrand factor A domain-containing protein 1             | VWA1    | -1.71 | 1.70E-02 |
| P21399 | Cytoplasmic aconitate hydratase                                 | ACO1    | -1.71 | 7.94E-03 |
| P30084 | Enoyl-CoA hydratase, mitochondrial                              | ECHS1   | -1.71 | 1.36E-03 |
| Q01082 | Spectrin beta chain, non-erythrocytic 1                         | SPTBN1  | -1.71 | 5.24E-04 |
| O43491 | Band 4.1-like protein 2                                         | EPB41L2 | -1.71 | 7.31E-03 |

**Supplemental Table 10. Predicted Upstream Master Regulators for Up- and Down-Regulated Fibrous Plaque Proteins**

**A. LAD Samples**

*Overrepresented Pathways with Consistent Evidence of Activation or Inhibition*

| Upstream Regulator | Molecule Type                     | p-value of overlap | Predicted Activation | Activation z-score |
|--------------------|-----------------------------------|--------------------|----------------------|--------------------|
| INSR               | kinase                            | 8.56E-16           | Inhibited            | -2.493             |
| PPARG              | ligand-dependent nuclear receptor | 2.42E-13           | Inhibited            | -2.805             |
| PPARA              | ligand-dependent nuclear receptor | 4.22E-10           | Inhibited            | -3.060             |
| <b>TNF</b>         | cytokine                          | 2.64E-07           | Activated            | 3.043              |

*Overrepresented Pathways without Consistent Evidence of Activation or Inhibition*

| Upstream Regulator | Molecule Type                     | p-value of overlap | Predicted Activation | Activation z-score |
|--------------------|-----------------------------------|--------------------|----------------------|--------------------|
| <b>TP53</b>        | transcription regulator           | 5.60E-08           | n/a                  | -0.723             |
| <b>MGEA5</b>       | enzyme                            | 2.40E-06           | n/a                  | 0.302              |
| PTEN               | phosphatase                       | 2.48E-06           | n/a                  | -0.950             |
| ESR2               | ligand-dependent nuclear receptor | 1.61E-05           | n/a                  | -0.239             |
| <b>MYC</b>         | transcription regulator           | 2.34E-04           | n/a                  | 0.000              |
| <b>ERBB2</b>       | kinase                            | 4.20E-04           | n/a                  | n/a*               |
| <b>TGFB1</b>       | growth factor                     | 1.79E-03           | n/a                  | 0.720              |

\* not enough information in the Ingenuity database to estimate

**B. AA Samples**

*Overrepresented Pathways with Consistent Evidence of Activation or Inhibition*

| Upstream Regulator | Molecule Type | p-value of overlap | Predicted Activation | Activation z-score |
|--------------------|---------------|--------------------|----------------------|--------------------|
| <b>TGFB1</b>       | growth factor | 8.53E-11           | Inhibited            | -3.147             |
| APOE               | transporter   | 4.53E-09           | Inhibited            | -2.611             |
| APP                | other         | 2.76E-06           | Activated            | 2.148              |
| <b>TNF</b>         | cytokine      | 1.92E-05           | Activated            | 2.192              |
| IL1B               | cytokine      | 2.31E-05           | Activated            | 2.676              |
| <b>MGEA5</b>       | enzyme        | 9.02E-04           | Activated            | 2.714              |
| IL6                | cytokine      | 1.05E-03           | Activated            | 2.195              |

*Overrepresented Pathways without Consistent Evidence of Activation or Inhibition*

| Upstream Regulator | Molecule Type           | p-value of overlap | Predicted Activation | Activation z-score |
|--------------------|-------------------------|--------------------|----------------------|--------------------|
| <b>TP53</b>        | transcription regulator | 5.16E-11           | n/a                  | -1.918             |
| HRAS               | enzyme                  | 7.29E-11           | n/a                  | 0.617              |
| <b>MYC</b>         | transcription regulator | 8.34E-08           | n/a                  | -0.650             |
| MYCN               | transcription regulator | 3.17E-07           | n/a                  | 1.612              |

|              |                                                     |          |     |        |
|--------------|-----------------------------------------------------|----------|-----|--------|
| PRL          | cytokine                                            | 1.02E-05 | n/a | 0.818  |
| JUN          | transcription regulator<br>ligand-dependent nuclear | 2.60E-05 | n/a | 0.859  |
| AR           | receptor                                            | 5.86E-05 | n/a | -0.816 |
| MAPK1        | kinase                                              | 7.29E-05 | n/a | 0.000  |
| KRAS         | enzyme                                              | 7.39E-05 | n/a | -0.043 |
| NFKBIA       | transcription regulator                             | 2.55E-04 | n/a | 1.310  |
| HTT          | transcription regulator<br>ligand-dependent nuclear | 4.65E-04 | n/a | 0.447  |
| ESR1         | receptor                                            | 1.03E-03 | n/a | 0.905  |
| SP1          | transcription regulator                             | 1.84E-03 | n/a | 0.342  |
| <b>ERBB2</b> | kinase                                              | 3.98E-03 | n/a | -1.154 |
| SMARCA4      | transcription regulator                             | 4.67E-03 | n/a | -1.949 |
| STAT3        | transcription regulator                             | 6.15E-03 | n/a | 1.680  |
| FOS          | transcription regulator                             | 1.22E-02 | n/a | -1.069 |
| CTNNB1       | transcription regulator                             | 1.32E-02 | n/a | 0.000  |

Up-stream regulators common to both territories are indicated in **bold**

**Supplemental Table 11. Up-Regulated Proteins in Fibrous Plaque Enriched AA Samples (n=7) Compared with Normal AA Samples (n=15).** Samples were selected using patho-proteomic phenotyping designed to integrate pathologist assessment of extent of disease and CAM deconvolution of global protein profiles (fold-change = mean FP/ mean NL).

| <u>Uniprot ID</u> | <u>Protein</u>                                          | <u>Gene</u> | <u>Fold-change</u> | <u>q-value</u> |
|-------------------|---------------------------------------------------------|-------------|--------------------|----------------|
| P04114            | Apolipoprotein B-100                                    | APOB        | 11.68              | 4.87E-03       |
| P13796            | Plastin-2                                               | LCP1        | 9.22               | 4.50E-04       |
| P02675            | Fibrinogen beta chain                                   | FGB         | 6.03               | 1.73E-03       |
| P07858            | Cathepsin B                                             | CTSB        | 5.99               | 4.84E-03       |
| P00734            | Prothrombin                                             | F2          | 5.30               | 5.92E-04       |
| P00738            | Haptoglobin                                             | HP          | 4.26               | 1.36E-03       |
| P01892            | HLA class I histocompatibility antigen, A-2 alpha chain | HLA-A       | 4.16               | 4.73E-03       |
| P20742            | Pregnancy zone protein                                  | PZP         | 4.04               | 3.90E-02       |
| P27169            | Serum paraoxonase/arylesterase 1                        | PON1        | 4.04               | 3.42E-02       |
| P19823            | Inter-alpha-trypsin inhibitor heavy chain H2            | ITIH2       | 4.00               | 7.61E-04       |
| P40121            | Macrophage-capping protein                              | CAPG        | 3.88               | 1.09E-02       |
| P35442            | Thrombospondin-2                                        | THBS2       | 3.82               | 1.36E-03       |
| P00488            | Coagulation factor XIII A chain                         | F13A1       | 3.77               | 5.86E-03       |
| P01031            | Complement C5                                           | C5          | 3.64               | 5.07E-03       |
| P02679            | Fibrinogen gamma chain                                  | FGG         | 3.53               | 3.90E-03       |
| P04003            | C4b-binding protein alpha chain                         | C4BPA       | 3.45               | 1.24E-03       |
| P00739            | Haptoglobin-related protein                             | HPR         | 3.41               | 5.26E-03       |
| P31146            | Coronin-1A                                              | CORO1A      | 3.30               | 3.13E-05       |
| P05090            | Apolipoprotein D                                        | APOD        | 3.29               | 2.90E-04       |
| P24821            | Tenascin                                                | TNC         | 3.17               | 2.70E-03       |
| P05546            | Heparin cofactor 2                                      | SERPIND1    | 3.12               | 1.03E-02       |
| P02649            | Apolipoprotein E                                        | APOE        | 3.06               | 2.06E-04       |
| Q14624            | Inter-alpha-trypsin inhibitor heavy chain H4            | ITIH4       | 3.04               | 3.70E-04       |
| P02671            | Fibrinogen alpha chain                                  | FGA         | 3.03               | 1.26E-03       |
| P52209            | 6-phosphogluconate dehydrogenase, decarboxylating       | PGD         | 2.99               | 4.57E-02       |
| P05155            | Plasma protease C1 inhibitor                            | SERPING1    | 2.85               | 1.08E-04       |
| P00747            | Plasminogen                                             | PLG         | 2.73               | 4.08E-04       |
| P0C0L5            | Complement C4-B                                         | C4B         | 2.72               | 3.13E-05       |
| Q9BXR6            | Complement factor H-related protein 5                   | CFHR5       | 2.64               | 2.00E-02       |
| O43866            | CD5 antigen-like                                        | CD5L        | 2.63               | 1.62E-02       |
| O14791            | Apolipoprotein L1                                       | APOL1       | 2.58               | 3.29E-02       |
| P00736            | Complement C1r subcomponent                             | C1R         | 2.56               | 3.13E-02       |
| P02792            | Ferritin light chain                                    | FTL         | 2.54               | 4.01E-04       |
| Q9UBR2            | Cathepsin Z                                             | CTSZ        | 2.51               | 1.40E-02       |
| P19827            | Inter-alpha-trypsin inhibitor heavy chain H1            | ITIH1       | 2.50               | 1.95E-05       |
| P18428            | Lipopolysaccharide-binding protein                      | LBP         | 2.48               | 1.02E-04       |
| P01871            | Ig mu chain C region                                    | IGHM        | 2.43               | 2.07E-02       |
| P04196            | Histidine-rich glycoprotein                             | HRG         | 2.41               | 1.52E-06       |
| P20700            | Lamin-B1                                                | LMNB1       | 2.40               | 1.62E-02       |
| P04179            | Superoxide dismutase [Mn], mitochondrial                | SOD2        | 2.36               | 1.04E-03       |
| P61626            | Lysozyme C                                              | LYZ         | 2.31               | 1.72E-02       |
| P02794            | Ferritin heavy chain                                    | FTH1        | 2.21               | 5.16E-04       |
| Q96PD5            | N-acetylmuramoyl-L-alanine amidase                      | PGLYRP2     | 2.16               | 1.40E-02       |

|        |                                    |       |      |          |
|--------|------------------------------------|-------|------|----------|
| P07358 | Complement component C8 beta chain | C8B   | 2.15 | 3.93E-02 |
| P01023 | Alpha-2-macroglobulin              | A2M   | 2.11 | 8.38E-04 |
| P07339 | Cathepsin D                        | CTSD  | 2.05 | 4.12E-03 |
| P59665 | Neutrophil defensin 1              | DEFA1 | 2.04 | 1.75E-02 |
| P01877 | Ig alpha-2 chain C region          | IGHA2 | 2.02 | 2.90E-03 |
| P05156 | Complement factor I                | CFI   | 1.98 | 8.48E-03 |
| P08603 | Complement factor H                | CFH   | 1.98 | 6.41E-06 |
| Q14764 | Major vault protein                | MVP   | 1.97 | 2.54E-02 |
| P00740 | Coagulation factor IX              | F9    | 1.88 | 1.16E-02 |
| P00751 | Complement factor B                | CFB   | 1.85 | 1.94E-02 |
| P13671 | Complement component C6            | C6    | 1.85 | 7.56E-03 |
| P01594 | Ig kappa chain V-l region AU       |       | 1.84 | 4.49E-02 |
| P00450 | Ceruloplasmin                      | CP    | 1.83 | 7.34E-05 |
| P10643 | Complement component C7            | C7    | 1.82 | 1.97E-03 |
| P04004 | Vitronectin                        | VTN   | 1.81 | 9.08E-04 |
| Q9UJ70 | N-acetyl-D-glucosamine kinase      | NAGK  | 1.80 | 3.61E-02 |
| O14818 | Proteasome subunit alpha type-7    | PSMA7 | 1.79 | 1.75E-02 |
| P01042 | Kininogen-1                        | KNG1  | 1.79 | 1.84E-03 |



**Supplemental Table 12. Down-Regulated Proteins in Fibrous Plaque Enriched AA Samples (n=7) Compared with Normal AA Samples (n=15).** Samples were selected using patho-proteomic phenotyping designed to integrate pathologist assessment of extent of disease and CAM deconvolution of global protein profiles. (For down regulated proteins Fold-change =  $-1 * \text{mean NL}/\text{mean FP}$ )

| <u>Uniprot ID</u> | <u>Protein</u>                                                    | <u>Gene</u> | <u>Fold-change</u> | <u>q-value</u> |
|-------------------|-------------------------------------------------------------------|-------------|--------------------|----------------|
| Q8N2S1            | Latent-transforming growth factor beta-binding protein 4          | LTBP4       | -6.38              | 4.00E-07       |
| P55083            | Microfibril-associated glycoprotein 4                             | MFAP4       | -4.92              | 6.64E-05       |
| Q7Z4I7            | LIM and senescent cell antigen-like-containing domain protein 2   | LIMS2       | -4.47              | 5.95E-05       |
| P17661            | Desmin                                                            | DES         | -4.36              | 1.95E-05       |
| P46821            | Microtubule-associated protein 1B                                 | MAP1B       | -4.11              | 4.00E-07       |
| P11216            | Glycogen phosphorylase, brain form                                | PYGB        | -3.74              | 7.51E-07       |
| Q9HBL0            | Tensin-1                                                          | TNS1        | -3.72              | 1.73E-05       |
| Q9H223            | EH domain-containing protein 4                                    | EHD4        | -3.69              | 1.52E-06       |
| Q0ZGT2            | Nexilin                                                           | NEXN        | -3.62              | 5.65E-05       |
| P16112            | Aggrecan core protein                                             | ACAN        | -3.55              | 6.64E-05       |
| Q14315            | Filamin-C                                                         | FLNC        | -3.54              | 7.34E-05       |
| Q53GG5            | PDZ and LIM domain protein 3                                      | PDLIM3      | -3.48              | 1.22E-05       |
| P50895            | Basal cell adhesion molecule                                      | BCAM        | -3.46              | 1.77E-06       |
| O00151            | PDZ and LIM domain protein 1                                      | PDLIM1      | -3.37              | 4.28E-05       |
| O43175            | D-3-phosphoglycerate dehydrogenase                                | PHGDH       | -3.31              | 4.90E-06       |
| O00159            | Unconventional myosin-1c                                          | MYO1C       | -3.19              | 3.56E-06       |
| P53814            | Smoothelin                                                        | SMTN        | -3.14              | 7.75E-07       |
| P29536            | Leiomodin-1                                                       | LMOD1       | -3.12              | 5.80E-07       |
| Q7Z7G0            | Target of Nesh-SH3                                                | ABI3BP      | -3.05              | 1.55E-04       |
| Q8WX93            | Palladin                                                          | PALLD       | -3.05              | 3.56E-06       |
| P60660            | Myosin light polypeptide 6                                        | MYL6        | -3.03              | 2.64E-04       |
| Q9NR12            | PDZ and LIM domain protein 7                                      | PDLIM7      | -2.98              | 4.12E-05       |
| Q01082            | Spectrin beta chain, non-erythrocytic 1                           | SPTBN1      | -2.86              | 2.07E-04       |
| Q9Y4G6            | Talin-2                                                           | TLN2        | -2.84              | 3.06E-05       |
| Q96A00            | Protein phosphatase 1 regulatory subunit 14A                      | PPP1R14A    | -2.82              | 3.88E-05       |
| Q8IVN8            | Somatomedin-B and thrombospondin type-1 domain-containing protein | SBSPON      | -2.79              | 1.87E-05       |
| Q15746            | Myosin light chain kinase, smooth muscle                          | MYLK        | -2.77              | 5.54E-06       |
| Q9NVD7            | Alpha-parvin                                                      | PARVA       | -2.69              | 5.54E-06       |
| Q9NZU5            | LIM and cysteine-rich domains protein 1                           | LMCD1       | -2.68              | 1.08E-05       |
| Q9UMS6            | Synaptopodin-2                                                    | SYNPO2      | -2.68              | 1.53E-04       |
| P19105            | Myosin regulatory light chain 12A                                 | MYL12A      | -2.57              | 1.95E-05       |
| P17655            | Calpain-2 catalytic subunit                                       | CAPN2       | -2.50              | 1.26E-04       |
| Q96HC4            | PDZ and LIM domain protein 5                                      | PDLIM5      | -2.48              | 5.89E-05       |
| O75112            | LIM domain-binding protein 3                                      | LDB3        | -2.48              | 3.29E-04       |
| Q07954            | Prolow-density lipoprotein receptor-related protein 1             | LRP1        | -2.47              | 9.83E-05       |
| Q9BX66            | Sorbin and SH3 domain-containing protein 1                        | SORBS1      | -2.45              | 4.10E-04       |
| Q9BZQ8            | Protein Niban                                                     | FAM129A     | -2.45              | 3.34E-04       |
| Q15942            | Zyxin                                                             | ZYX         | -2.40              | 8.03E-06       |
| Q9UGI8            | Testin                                                            | TES         | -2.39              | 3.47E-05       |
| O94875            | Sorbin and SH3 domain-containing protein 2                        | SORBS2      | -2.38              | 1.85E-04       |
| O14974            | Protein phosphatase 1 regulatory subunit 12A                      | PPP1R12A    | -2.38              | 2.97E-05       |

|        |                                                                    |         |       |          |
|--------|--------------------------------------------------------------------|---------|-------|----------|
| Q15365 | Poly(rC)-binding protein 1                                         | PCBP1   | -2.37 | 2.20E-04 |
| P09651 | Heterogeneous nuclear ribonucleoprotein A1                         | HNRNPA1 | -2.37 | 6.11E-03 |
| P16615 | Sarcoplasmic/endoplasmic reticulum calcium ATPase 2                | ATP2A2  | -2.36 | 4.13E-04 |
| P48059 | LIM and senescent cell antigen-like-containing domain protein 1    | LIMS1   | -2.33 | 8.29E-04 |
| Q14BN4 | Sarcolemmal membrane-associated protein                            | SLMAP   | -2.30 | 5.89E-05 |
| Q8WUP2 | Filamin-binding LIM protein 1                                      | FBLIM1  | -2.27 | 1.33E-04 |
| P51911 | Calponin-1                                                         | CNN1    | -2.26 | 6.30E-04 |
| Q93052 | Lipoma-preferred partner                                           | LPP     | -2.26 | 9.77E-05 |
| O43294 | Transforming growth factor beta-1-induced transcript 1 protein     | TGFB11  | -2.25 | 6.93E-04 |
| Q14204 | Cytoplasmic dynein 1 heavy chain 1                                 | DYNC1H1 | -2.24 | 1.66E-03 |
| Q05682 | Caldesmon                                                          | CALD1   | -2.24 | 2.94E-04 |
| Q16836 | Hydroxyacyl-coenzyme A dehydrogenase, mitochondrial                | HADH    | -2.22 | 6.78E-04 |
| O15061 | Synemin                                                            | SYNM    | -2.21 | 1.72E-02 |
| Q9BTV4 | Transmembrane protein 43                                           | TMEM43  | -2.21 | 1.16E-03 |
| Q9Y696 | Chloride intracellular channel protein 4                           | CLIC4   | -2.21 | 5.54E-06 |
| P43121 | Cell surface glycoprotein MUC18                                    | MCAM    | -2.18 | 1.28E-05 |
| P09104 | Gamma-enolase                                                      | ENO2    | -2.17 | 3.96E-04 |
| Q13976 | cGMP-dependent protein kinase 1                                    | PRKG1   | -2.16 | 3.88E-04 |
| Q03252 | Lamin-B2                                                           | LMNB2   | -2.15 | 1.03E-02 |
| Q13813 | Spectrin alpha chain, non-erythrocytic 1                           | SPTAN1  | -2.14 | 5.45E-04 |
| Q15019 | Septin-2                                                           | 2-Sep   | -2.11 | 1.58E-03 |
| Q15124 | Phosphoglucomutase-like protein 5                                  | PGM5    | -2.08 | 1.36E-03 |
| Q9UBX5 | Fibulin-5                                                          | FBLN5   | -2.08 | 9.44E-04 |
| P02511 | Alpha-crystallin B chain                                           | CRYAB   | -2.06 | 7.93E-03 |
| O14558 | Heat shock protein beta-6                                          | HSPB6   | -2.05 | 9.05E-05 |
| P13861 | cAMP-dependent protein kinase type II-alpha regulatory subunit     | PRKAR2A | -2.05 | 2.43E-04 |
| P53708 | Integrin alpha-8                                                   | ITGA8   | -2.02 | 1.15E-03 |
| P27816 | Microtubule-associated protein 4                                   | MAP4    | -2.01 | 3.71E-04 |
| O15230 | Laminin subunit alpha-5                                            | LAMA5   | -2.01 | 7.86E-04 |
| P20073 | Annexin A7                                                         | ANXA7   | -2.01 | 4.50E-03 |
| P55268 | Laminin subunit beta-2                                             | LAMB2   | -2.01 | 9.55E-04 |
| Q03135 | Caveolin-1                                                         | CAV1    | -1.98 | 2.33E-03 |
| Q96AC1 | Fermitin family homolog 2                                          | FERMT2  | -1.95 | 6.78E-04 |
| Q01995 | Transgelin                                                         | TAGLN   | -1.95 | 7.34E-05 |
| Q14240 | Eukaryotic initiation factor 4A-II                                 | EIF4A2  | -1.93 | 4.44E-03 |
| P08670 | Vimentin                                                           | VIM     | -1.92 | 3.35E-04 |
| Q92599 | Septin-8                                                           | 8-Sep   | -1.92 | 1.68E-02 |
| Q9NZN4 | EH domain-containing protein 2                                     | EHD2    | -1.92 | 1.66E-03 |
| Q04917 | 14-3-3 protein eta                                                 | YWHAH   | -1.89 | 1.16E-03 |
| Q00577 | Transcriptional activator protein Pur-alpha                        | PURA    | -1.89 | 1.73E-04 |
| Q9UBI6 | Guanine nucleotide-binding protein G(I)/G(S)/G(O) subunit gamma-12 | GNG12   | -1.88 | 2.96E-03 |
| Q13555 | Calcium/calmodulin-dependent protein kinase type II subunit gamma  | CAMK2G  | -1.88 | 5.82E-03 |
| P30084 | Enoyl-CoA hydratase, mitochondrial                                 | ECHS1   | -1.87 | 2.10E-02 |
| Q08257 | Quinone oxidoreductase                                             | CRYZ    | -1.87 | 7.25E-04 |
| Q16555 | Dihydropyrimidinase-related protein 2                              | DPYSL2  | -1.86 | 7.75E-07 |
| Q96S97 | Myeloid-associated differentiation marker                          | MYADM   | -1.85 | 1.68E-04 |
| Q16181 | Septin-7                                                           | 7-Sep   | -1.85 | 5.25E-03 |
| Q9H4M9 | EH domain-containing protein 1                                     | EHD1    | -1.84 | 1.71E-03 |
| Q8WUM4 | Programmed cell death 6-interacting                                | PDCD6IP | -1.84 | 9.46E-03 |

|        | protein                                                             |         |       |          |
|--------|---------------------------------------------------------------------|---------|-------|----------|
| Q15847 | Adipogenesis regulatory factor                                      | ADIRF   | -1.84 | 8.01E-03 |
| P11047 | Laminin subunit gamma-1                                             | LAMC1   | -1.84 | 5.83E-04 |
| Q9NZN3 | EH domain-containing protein 3                                      | EHD3    | -1.83 | 3.53E-03 |
| P36871 | Phosphoglucomutase-1                                                | PGM1    | -1.81 | 2.31E-03 |
| P05388 | 60S acidic ribosomal protein P0                                     | RPLP0   | -1.79 | 2.10E-03 |
| Q6NZ12 | Polymerase I and transcript release factor                          | PTRF    | -1.78 | 2.41E-03 |
| P12277 | Creatine kinase B-type                                              | CKB     | -1.77 | 1.09E-02 |
| P31150 | Rab GDP dissociation inhibitor alpha                                | GDI1    | -1.76 | 7.96E-03 |
| P62140 | Serine/threonine-protein phosphatase PP1-<br>beta catalytic subunit | PPP1CB  | -1.76 | 6.41E-03 |
| P35749 | Myosin-11                                                           | MYH11   | -1.75 | 3.46E-04 |
| Q9UL25 | Ras-related protein Rab-21                                          | RAB21   | -1.73 | 4.72E-03 |
| P21333 | Filamin-A                                                           | FLNA    | -1.73 | 3.57E-04 |
| Q969G5 | Protein kinase C delta-binding protein                              | PRKCDBP | -1.73 | 1.18E-02 |
| P39060 | Collagen alpha-1(XVIII) chain                                       | COL18A1 | -1.72 | 3.46E-04 |
| P63167 | Dynein light chain 1, cytoplasmic                                   | DYNLL1  | -1.70 | 3.39E-04 |
| Q63ZY3 | KN motif and ankyrin repeat domain-<br>containing protein 2         | KANK2   | -1.70 | 1.38E-02 |

**Supplementary Table 19. Overlap of Patho-Proteomic Fibrous Plaque Proteins In Human LAD (n=99) and AA (n=99) Samples** Twelve proteins were significantly ( $q \leq 0.05$ ) up-regulated in fibrous plaque enriched samples compared to normal samples in both the LAD and AA. With the exception of cathepsin Z, all of the up-regulated proteins were also identified as fibrous plaque proteins in both LAD and AA using CAM. Similarly, seven proteins were significantly down-regulated in fibrous plaque samples compared to normal.

| UniProt ID | Protein                            | Gene   | LAD         |          | AA          |          |                |
|------------|------------------------------------|--------|-------------|----------|-------------|----------|----------------|
|            |                                    |        | Fold-change | q-value  | Fold-change | q-value  |                |
| P24821     | Tenascin                           | TNC    | 13.04       | 1.08E-03 | 3.17        | 2.70E-03 | up-regulated   |
| P04114     | Apolipoprotein B-100               | APOB   | 3.65        | 6.26E-04 | 11.68       | 4.87E-03 |                |
| P13796     | Plastin-2                          | LCP1   | 3.87        | 9.80E-04 | 9.22        | 4.50E-04 |                |
| P07858     | Cathepsin B                        | CTSB   | 3.63        | 3.13E-04 | 5.99        | 4.84E-03 |                |
| P40121     | Macrophage-capping protein         | CAPG   | 2.72        | 6.89E-03 | 3.88        | 1.09E-02 |                |
| P35442     | Thrombospondin-2                   | THBS2  | 2.69        | 4.40E-04 | 3.82        | 1.36E-03 |                |
| P01031     | Complement C5                      | C5     | 1.89        | 1.58E-02 | 3.64        | 5.07E-03 |                |
| P31146     | Coronin-1A                         | CORO1A | 2.13        | 1.22E-02 | 3.30        | 3.13E-05 |                |
| P02619     | Apolipoprotein E                   | APOE   | 1.79        | 1.28E-02 | 3.06        | 2.06E-04 |                |
| Q43866     | CD5 antigen-like                   | CD5L   | 2.10        | 1.22E-02 | 2.63        | 1.62E-02 |                |
| Q9JBR2     | Cathepsin Z                        | CTSZ   | 2.20        | 9.53E-04 | 2.51        | 1.40E-02 |                |
| P01871     | Ig mu chain C region               | IGHM   | 2.15        | 8.14E-03 | 2.43        | 2.07E-02 |                |
| P46821     | Microtubule-associated protein 1B  | MAP1B  | -1.90       | 4.59E-03 | -4.11       | 4.00E-07 | down-regulated |
| Q9H810     | Tnfrsf1                            | TNFS1  | -2.01       | 5.58E-04 | -3.77       | 1.73E-05 |                |
| Q43175     | D-3-phosphoglycerate dehydrogenase | PHGDH  | -2.09       | 2.77E-04 | -3.31       | 4.90E-06 |                |
| Q75112     | ILM domain-binding protein 3       | ILB3   | -1.98       | 7.70E-07 | -2.48       | 3.29E-04 |                |
| P51911     | Calponin-1                         | CNN1   | -1.71       | 1.88E-03 | -2.26       | 6.30E-04 |                |
| P27816     | Microtubule-associated protein 4   | MAP4   | -1.78       | 1.28E-02 | -2.01       | 3.71E-04 |                |
| P30084     | Enoyl-CoA hydratase, mitochondrial | EC-151 | -1.71       | 1.36E-03 | -1.87       | 2.10E-02 |                |

## Proteomic Architecture of Human Coronary and Aortic Atherosclerosis

Herrington David M<sup>1\*</sup>, Mao Chunhong<sup>2</sup>, Parker Sarah<sup>3</sup>, Fu Zongming<sup>4</sup>, Yu Guoqiang<sup>5</sup>, Chen Lulu<sup>5</sup>, Venkatraman Vidya<sup>3</sup>, Fu Yi<sup>5</sup>, Wang Yizhi<sup>5</sup>, Howard Tim<sup>6</sup>, Goo Jun<sup>7</sup>, Zhao CF<sup>1</sup>, Liu Yongming<sup>8</sup>, Saylor Georgia<sup>1</sup>, Athas Grace<sup>9</sup>, Troxclair Dana<sup>9</sup>, Hixson James<sup>7\*</sup>, Vander Heide Richard<sup>9\*</sup>, Wang Yue<sup>4\*</sup>, Van Eyk Jennifer<sup>3\*</sup> (\*contributed equally)

### Supplemental Figures

#### Table of Contents

|                         |                                                                                                                                           |
|-------------------------|-------------------------------------------------------------------------------------------------------------------------------------------|
| Supplemental Figure 1a. | Enriched GO:Biological Process Terms From Human LAD and AA Proteins                                                                       |
| Supplemental Figure 1b. | Enriched GO:Molecular Function Terms From Human LAD and AA Proteins                                                                       |
| Supplemental Figure 1c. | Enriched GO:Cellular Component Terms From Human LAD and AA Proteins                                                                       |
| Supplemental Figure 2.  | Weighted Co-Expression Network Analysis of Human Abdominal Aortic (AA) Proteins                                                           |
| Supplemental Figure 3.  | Number of identifiable proteins from human LAD and AA arterial samples                                                                    |
| Supplemental Figure 4.  | Comparison of Extra Cellular Matrix Proteins in Normal LAD and AA Samples                                                                 |
| Supplemental Figure 5.  | Elastic Net Modelling of Proteins Predicting Presence or Absence of Fibrous Plaque in LAD (N=99) Samples                                  |
| Supplemental Figure 1.  | Ternary plots of the distribution of %fibrous plaque, %fatty streak and %normal intima in hu LAD and AA samples.                          |
| Supplemental Figure 4.  | Top Green Module LAD Proteins                                                                                                             |
| Supplemental Figure 5.  | Abdominal Aortic (AA) Proteins with High Membership in the AA Brown Module                                                                |
| Supplemental Figure 6.  | Misclassification and AUC Across a Range of Lambda for Two Typical Elastic Net Models of L Proteins Predicting Presence of Fibrous Plaque |
| Supplemental Figure 7.  | Convex Analysis of Mixtures (CAM) of AA Protein Data                                                                                      |
| Supplemental Figure 8.  | Convex Analysis of Mixtures (CAM) Identified Upregulated Fibrous Plaque Marker Proteins f LAD (n=99) and AA (n=99) Samples                |
| Supplemental Figure 9a. | Differential Dependent Network Analysis of LAD and AA Fibrous Plaque Proteins                                                             |
| Supplemental Figure 9b. | Differential Dependent Network Analysis of LAD and AA Fibrous Plaque Proteins                                                             |

Supplemental Figure 10. Arterial Sample Acquisition

Supplemental Figure 11. Data missingness, imputation, batch affects and anatomic overlap

### Supplemental Figure 1a. Enriched GO:Biological Process Terms From Human LAD and AA Proteins

GO enrichment analysis was performed using 944 LAD proteins (left half of the plot – blue) and 725 AA proteins (right half of the plot – purple) that were included for subsequent analysis. GO terms with Bonferroni adjusted p-value <0.05 in either anatomic territory are presented.

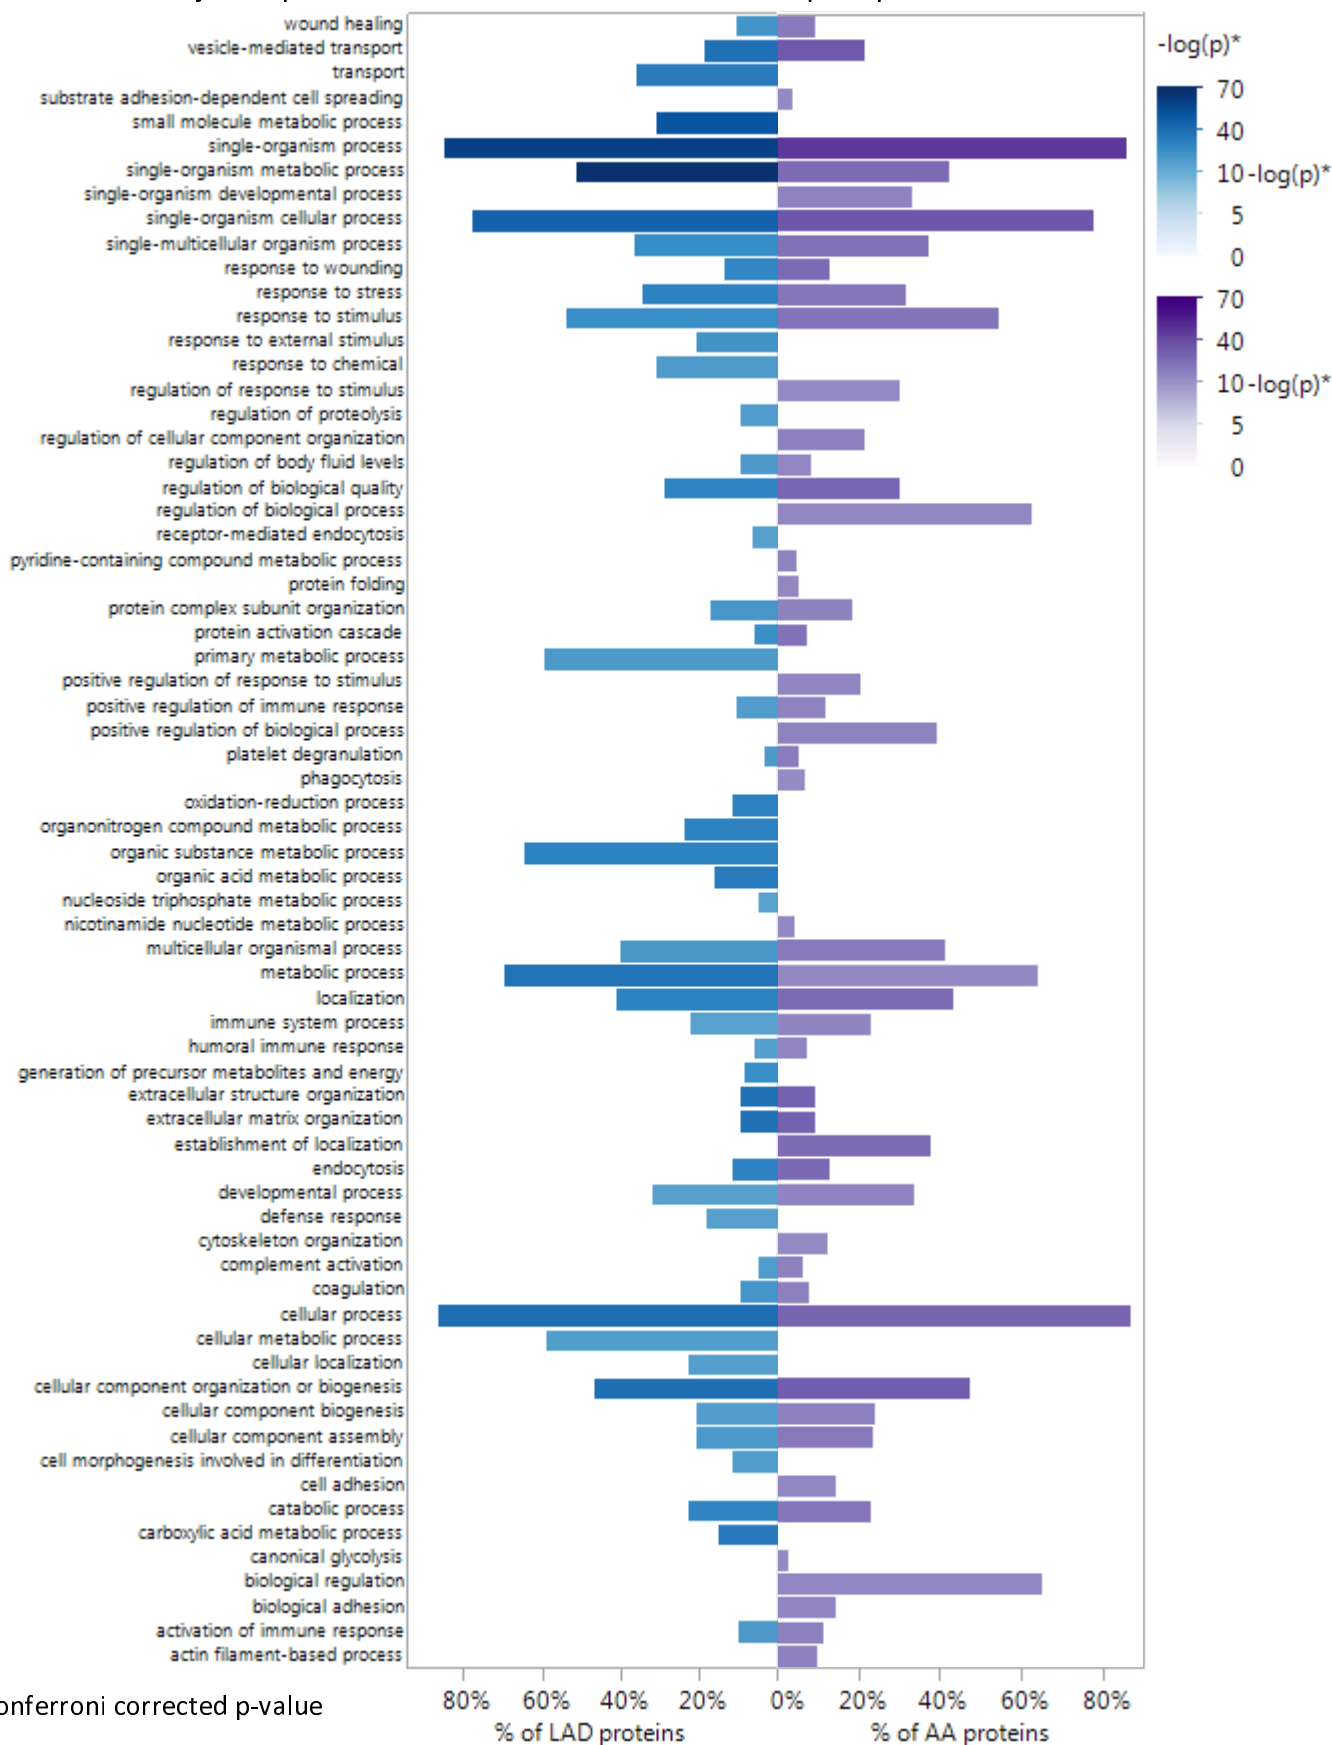

\* Bonferroni corrected p-value

### Supplemental Figure 1b. Enriched GO:Molecular Function Terms From Human LAD and AA Proteins

GO term enrichment analysis was performed using 944 LAD proteins (left half of the plot – blue) and 725 AA proteins (right half of the plot – purple) that were included for subsequent analysis. GO terms with Bonferroni adjusted p-value <0.05 in either anatomic territory are presented.

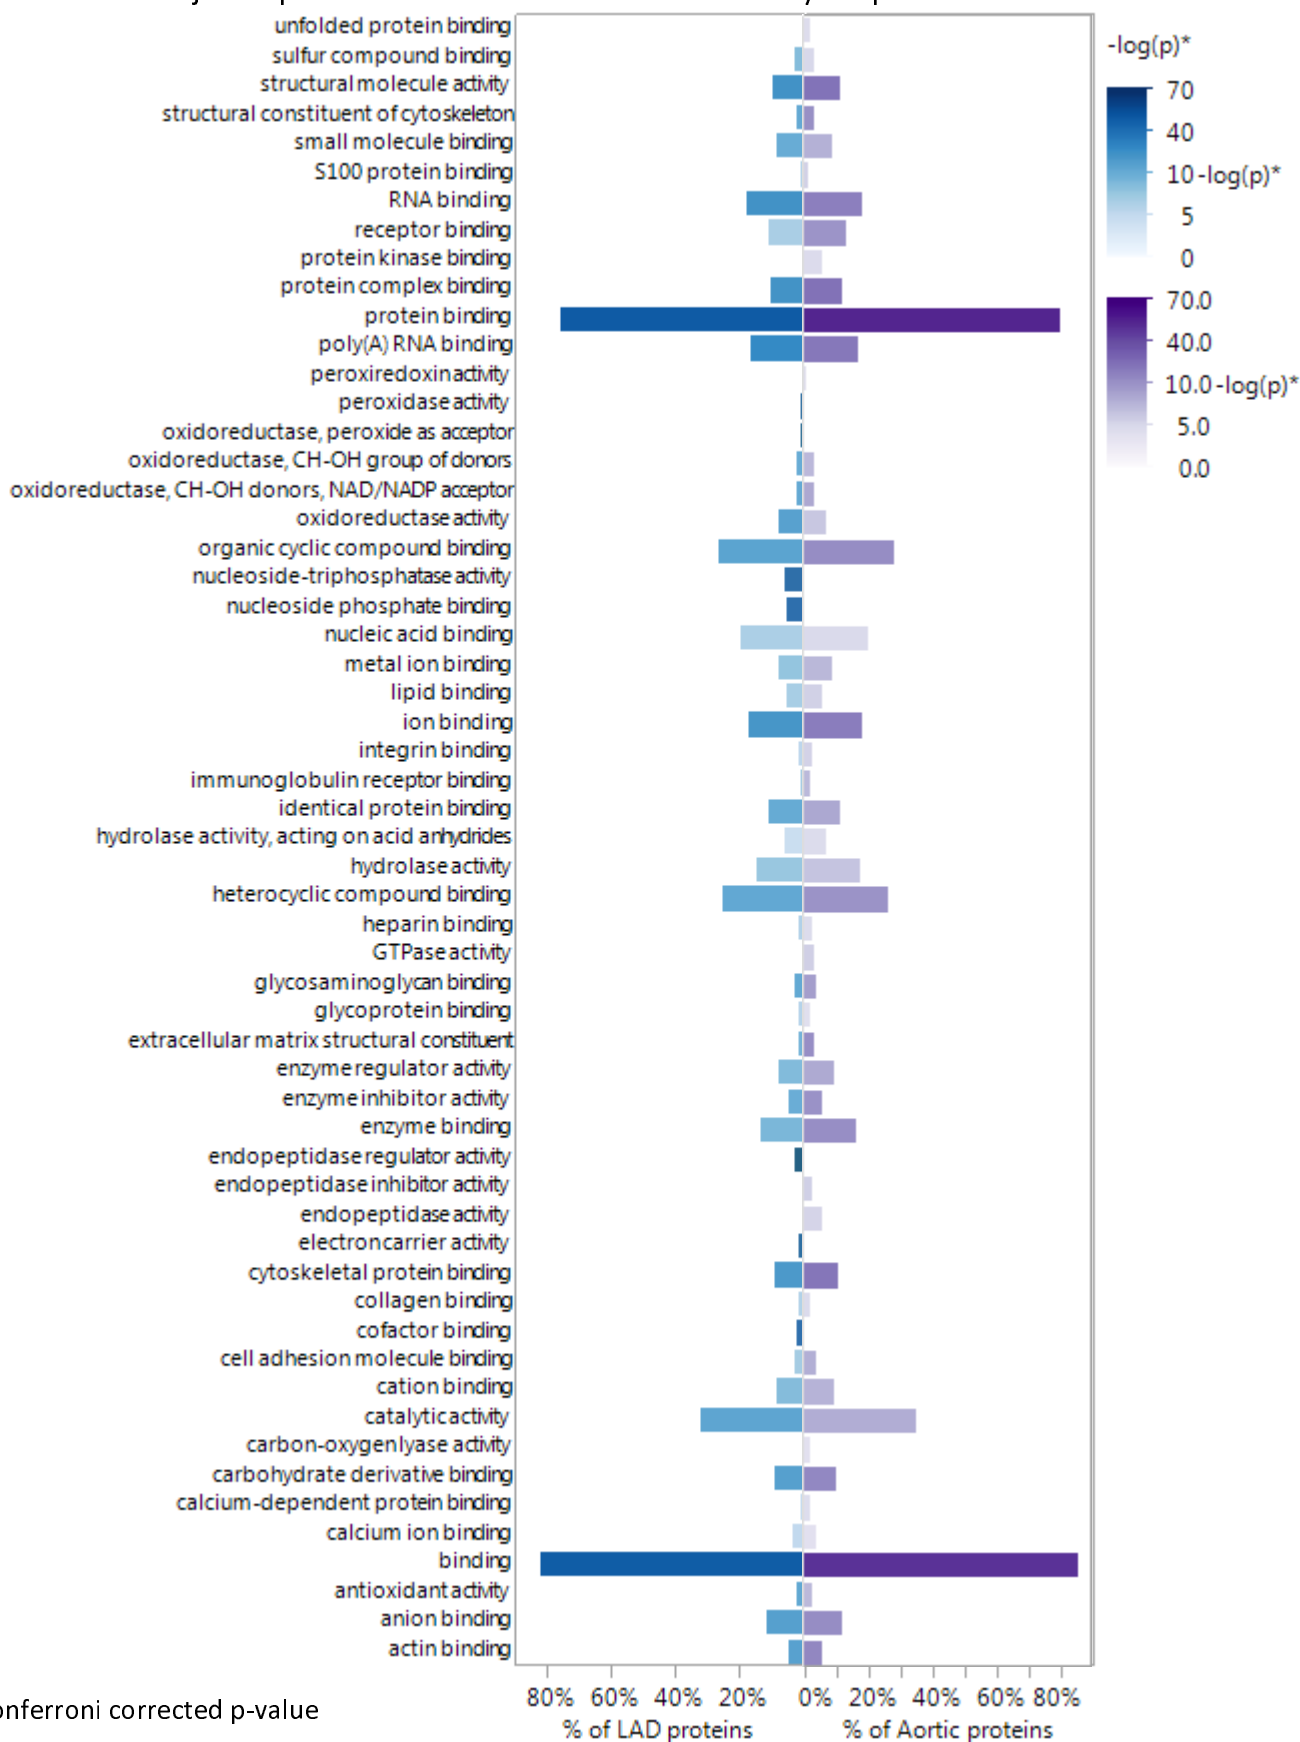

\* Bonferroni corrected p-value



**Supplemental Figure 1c. Enriched GO:Cellular Component Terms From Human LAD and AA Proteins**

GO term enrichment analysis was performed using 944 LAD proteins (left half of the plot – blue) and 725 AA proteins (right half of the plot – purple) that were included for subsequent analysis. GO terms with Bonferroni adjusted p-value <0.05 in either anatomic territory are presented.

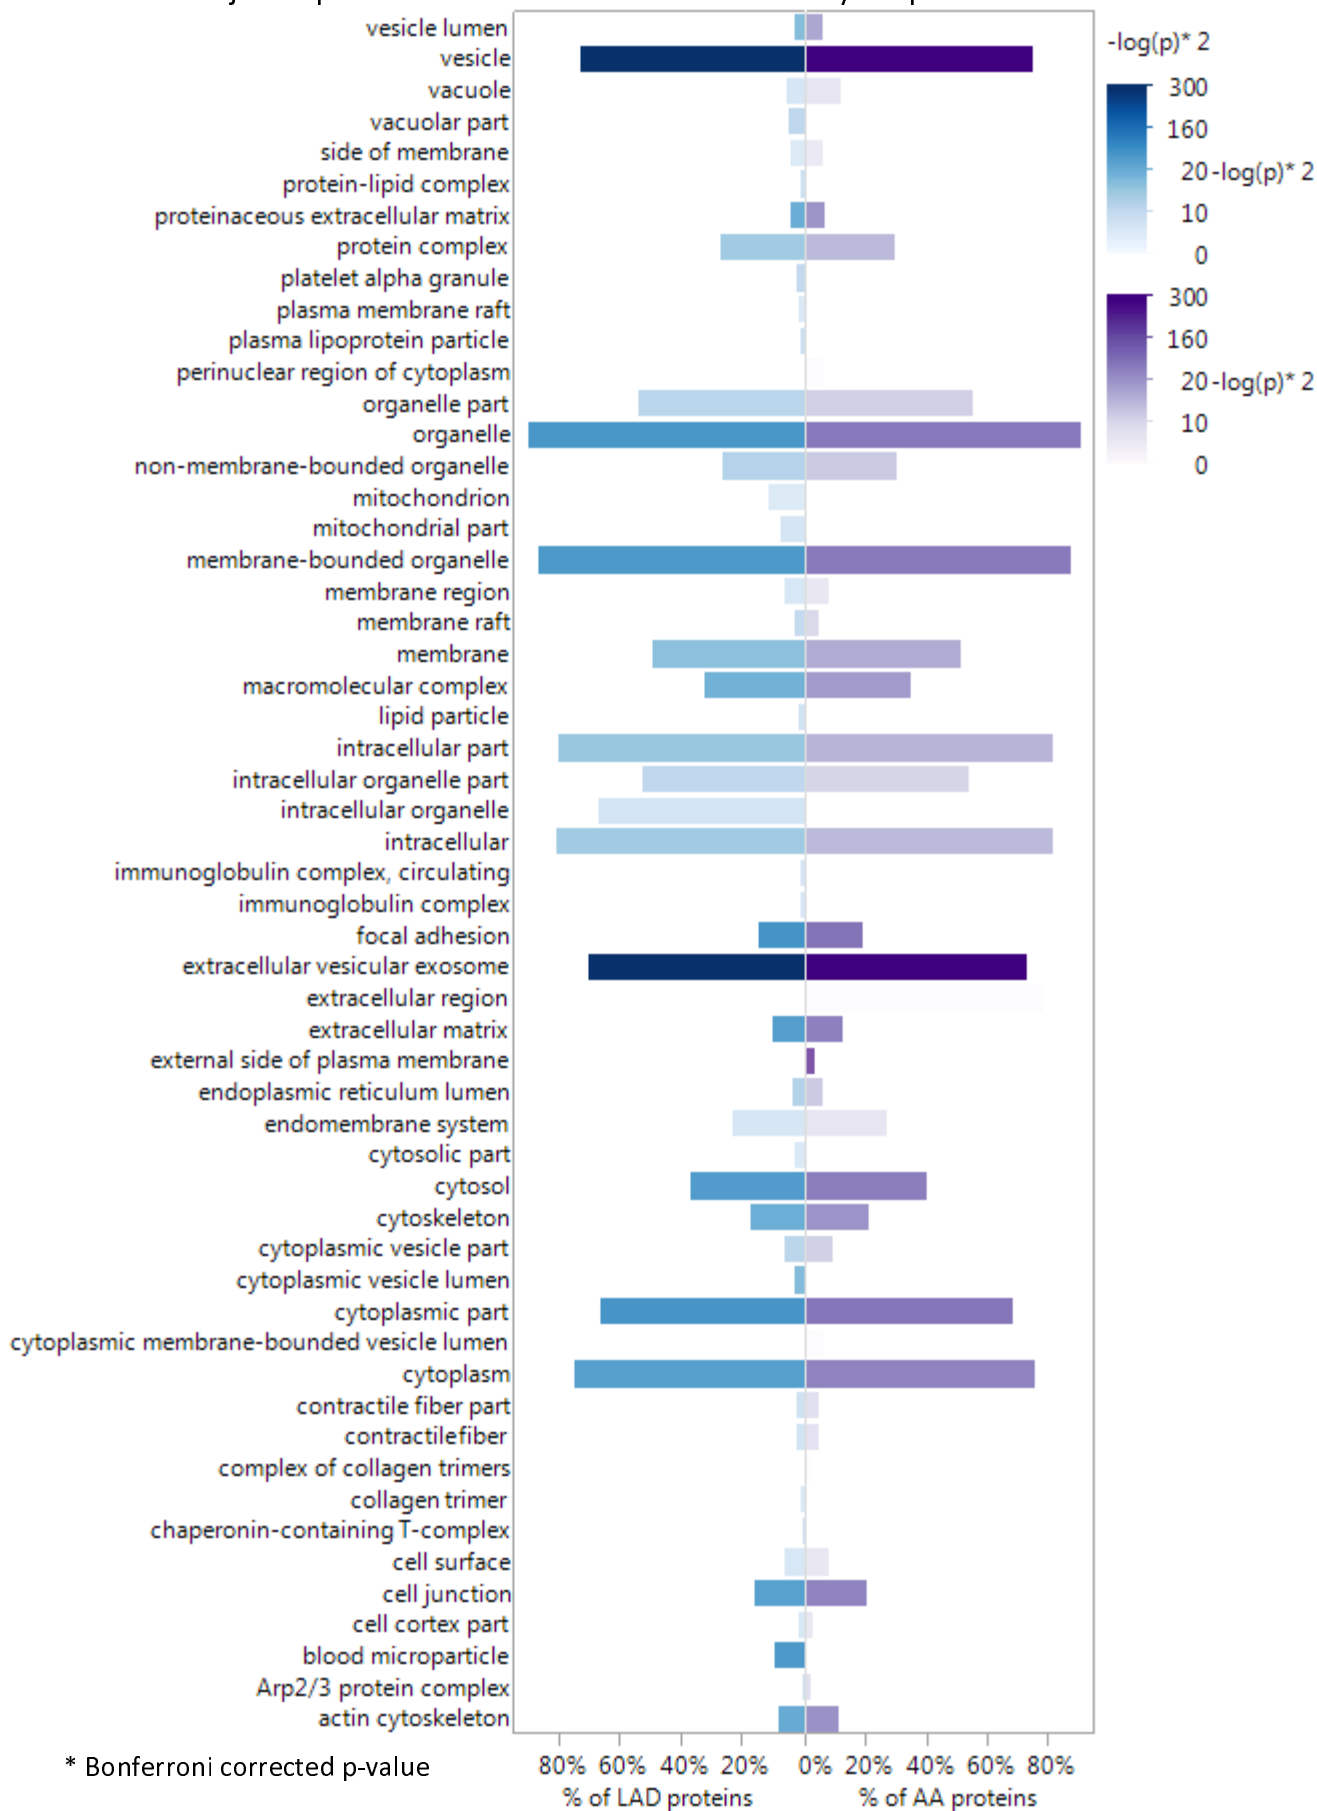

\* Bonferroni corrected p-value

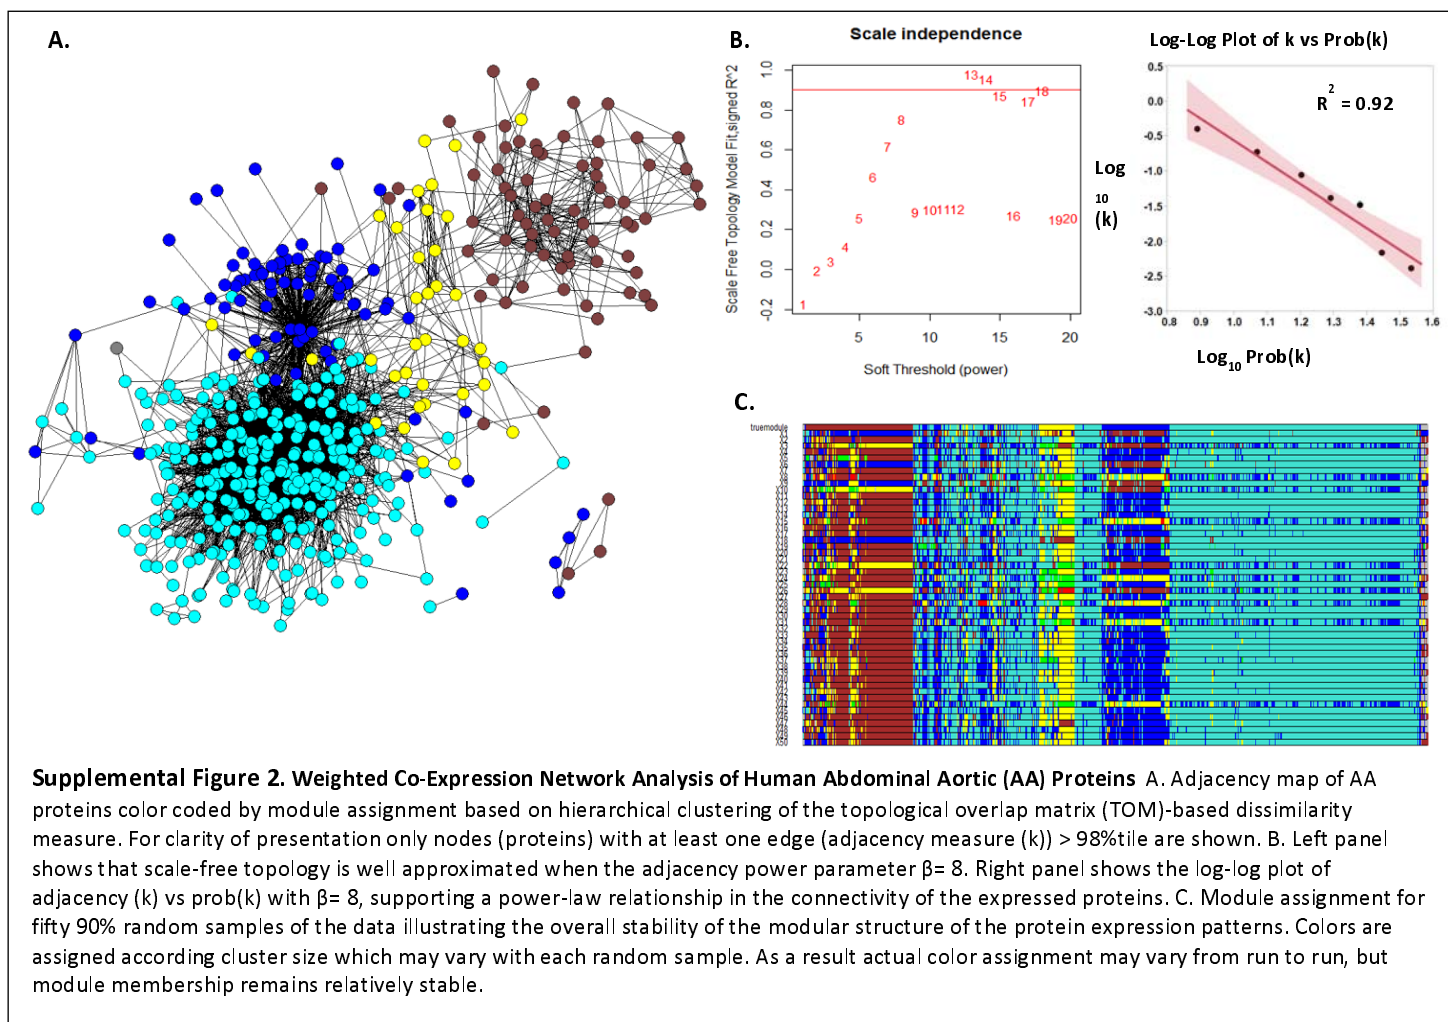

**Supplemental Figure 3. Number of identifiable proteins from human LAD and AA arterial samples.** a. All samples (n=99 samples from each territory). Left Venn diagram: proteins detected at least once in any sample according to anatomic territory; Right Venn diagram: proteins detected in >50% of the samples. GO term analysis of the LAD only proteins indicated significant enrichment of mitochondrial proteins (p-values: unambiguous proteins =  $1.8e-28$ ; proteins with <50% missingness =  $1.7e-6$ ) b. Normal samples only (n=30 from each territory). Left Venn diagram: proteins detected at least once in any sample according to anatomic territory; Right Venn diagram: proteins detected in >50% of the samples. GO term analysis of the LAD only proteins indicated significant enrichment of mitochondrial proteins (p-values: unambiguous proteins =  $1.0e-13$ ; proteins with <50% missingness p-value =  $1.9e-12$ )

**a. All Samples (LAD: n=99; AA: n=99)**

**Unambiguous proteins**

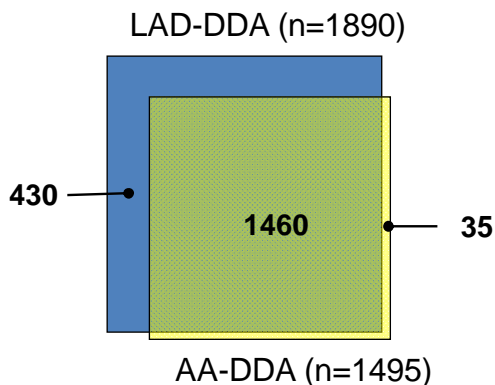

**Proteins with <50% missingness**

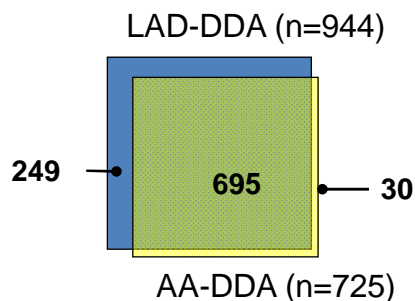

**b. Normal Samples only (LAD: n=30; AA: n=30)**

**Unambiguous proteins**

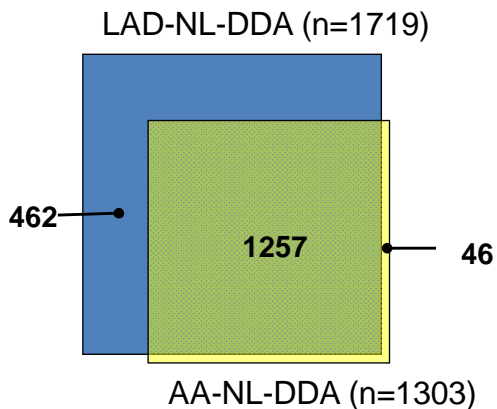

**Proteins with <50% missingness**

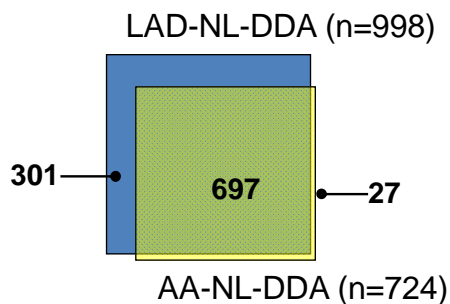

**Supplemental Figure 4. Comparison of Mitochondrial Proteins in Normal LAD and AA Samples.** Data independent MS (SWATH) analysis of completely normal LAD and AA samples (n=15 from each anatomic location) with adjustment for age, sex, MYH11, RABA7A, TERA, G6PI. Mean fold-difference = 6% (AA>LAD), p= 0.01.

**LAD vs AA Signed Fold-Difference (LAD/AA): ECM Proteins**

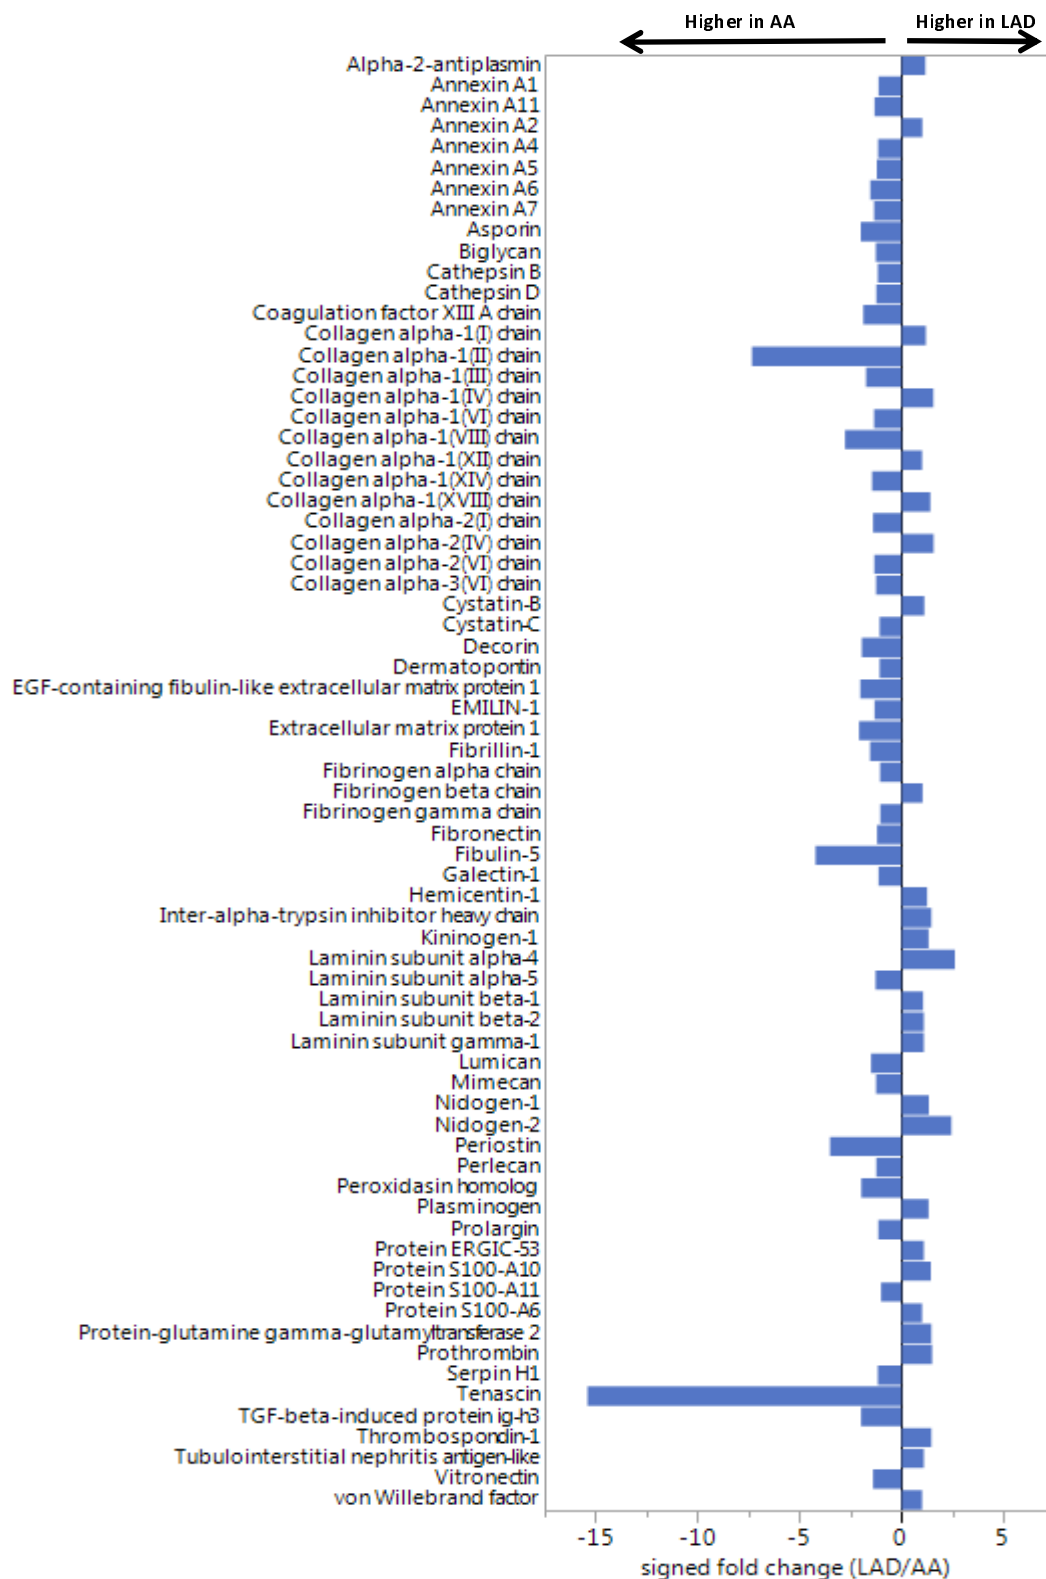

### Supplemental Figure 5. Elastic Net Modelling of Proteins Predicting Presence or Absence of Fibrous Plaque in LAD (N=99)

**Samples.** Graphs: Misclassification and AUC across a range of lambdas for two typical elastic net models predicting presence of fibrous plaque. Red points indicate the mean and bars indicate the SE for the estimate of misclassification or AUC across 10-folds in a cross-fold validation scheme. Numbers across the top indicate the number of variables (proteins) remaining in the model as the model progresses from the most inclusive (left) to the most parsimonious (right).

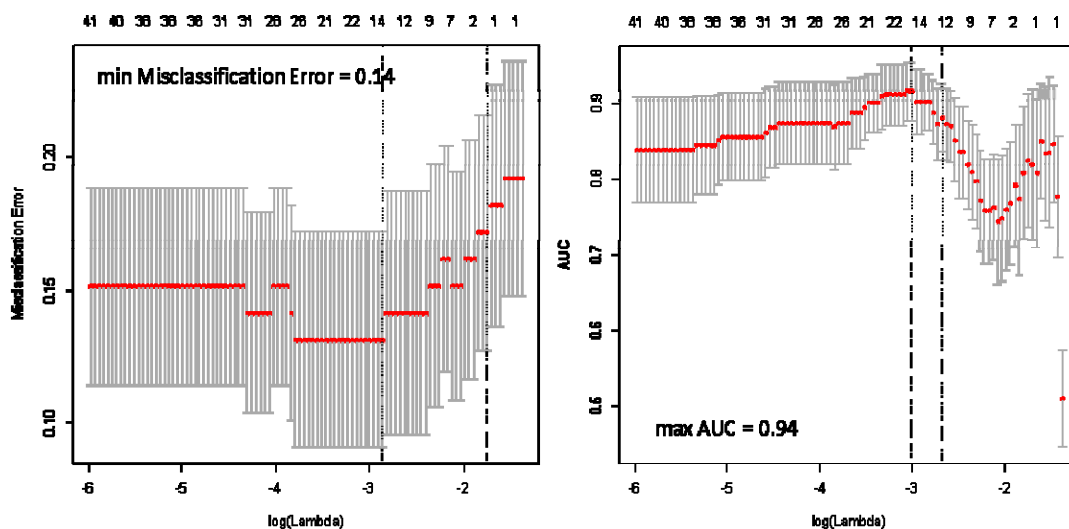

Table: Models were developed using cross-fold validation to select the lambdas optimizing AUC or misclassification. To minimize the effect of chance in selecting folds for the cross-fold validation each model was run 100 times and the selected proteins and their respective beta coefficients were recorded. The table indicates the number of

times each protein was selected in each of 100 models and the mean beta for the subset of models where the protein in question was included. Proteins included in 10 or more models are indicated by bold in the # of models columns. Several highly correlated proteins competed for entry into these models.

| Uniprot ID | Protein                                                                  | Gene     | Maximizing AUC |           | Minimizing Misclassification |           |
|------------|--------------------------------------------------------------------------|----------|----------------|-----------|------------------------------|-----------|
|            |                                                                          |          | # of models    | mean beta | # of models                  | mean beta |
| P24821     | Tenascin                                                                 | TNC      | <b>98</b>      | 0.2186    | <b>99</b>                    | 0.4057    |
| Q43852     | Calumenin                                                                | CALU     | <b>39</b>      | 1.2896    | <b>76</b>                    | 0.3454    |
| Q8NBX0     | Saccharopine dehydrogenase-like oxidoreductase                           | SCCPDH   | <b>39</b>      | 0.9419    | <b>46</b>                    | 0.5198    |
| Q43866     | CD5 antigen-like                                                         | CD5L     | <b>39</b>      | 0.8716    | <b>69</b>                    | 0.2865    |
| O14773     | Tripeptidyl-peptidase 1                                                  | TPP1     | <b>39</b>      | 0.7078    | <b>76</b>                    | 0.1898    |
| Q15063     | Periostin                                                                | POSTN    | <b>39</b>      | 0.5949    | <b>93</b>                    | 0.1174    |
| P07602     | Prosaposin                                                               | PSAP     | <b>39</b>      | 0.4851    | <b>48</b>                    | 0.2585    |
| P13760     | HLA class II histocompatibility antigen, DRB1-4 beta chain               | HLA-DRB1 | <b>39</b>      | 0.4804    | <b>99</b>                    | 0.1096    |
| Q9UBR2     | Cathepsin Z                                                              | CTSZ     | <b>39</b>      | 0.2781    | <b>85</b>                    | 0.1031    |
| Q6NZI2     | Polymerase I and transcript release factor                               | PTRF     | <b>39</b>      | -0.9566   | <b>46</b>                    | -0.5423   |
| P07998     | Ribonuclease pancreatic                                                  | RNASE1   | <b>38</b>      | 0.0979    | <b>23</b>                    | 0.1233    |
| P09543     | 2',3'-cyclic-nucleotide 3'-phosphodiesterase                             | CNP      | <b>38</b>      | -0.2526   | <b>26</b>                    | -0.2877   |
| Q03135     | Caveolin-1                                                               | CAV1     | <b>38</b>      | -0.2749   | <b>45</b>                    | -0.1503   |
| P07858     | Cathepsin B                                                              | CTSB     | <b>32</b>      | 0.0764    | <b>95</b>                    | 0.0270    |
| P04114     | Apolipoprotein B-100                                                     | APOB     | <b>21</b>      | 0.3371    | <b>11</b>                    | 0.5460    |
| Q16853     | Membrane primary amine oxidase                                           | AOC3     | <b>19</b>      | -0.0698   | <b>10</b>                    | -0.0813   |
| P40261     | Nicotinamide N-methyltransferase                                         | NNMT     | <b>17</b>      | 0.4705    | <b>8</b>                     | 0.9733    |
| Q13200     | 26S proteasome non-ATPase regulatory subunit 2                           | PSMD2    | <b>15</b>      | -0.6538   | <b>6</b>                     | -1.8703   |
| P11586     | C-1-tetrahydrofolate synthase, cytoplasmic                               | MTHFD1   | <b>13</b>      | -0.1454   | <b>3</b>                     | -1.2007   |
| P50395     | Rab GDP dissociation inhibitor beta                                      | GDI2     | <b>8</b>       | 0.6810    | <b>3</b>                     | 2.5022    |
| P63241     | Eukaryotic translation initiation factor 5A-1                            | EIF5A    | <b>8</b>       | -0.7468   | <b>3</b>                     | -3.2132   |
| P08237     | ATP-dependent 6-phosphofructokinase, muscle type                         | PFKM     | <b>7</b>       | 0.5024    | <b>3</b>                     | 1.7951    |
| Q06828     | Fibromodulin                                                             | FMOD     | <b>7</b>       | -2.3252   | <b>3</b>                     | -7.3673   |
| P09960     | Leukotriene A-4 hydrolase                                                | LTA4H    | <b>6</b>       | 0.9809    | <b>3</b>                     | 2.6087    |
| P04844     | Dolichyl-diphosphooligosaccharide--protein glycosyltransferase subunit 2 | RPN2     | <b>2</b>       | 3.3432    | <b>1</b>                     | 14.3237   |
| P34932     | Heat shock 70 kDa protein 4                                              | HSPA4    | <b>2</b>       | 5.1045    | <b>1</b>                     | 20.5268   |
| P49908     | Selenoprotein P                                                          | SEPP1    | <b>2</b>       | -5.0315   | <b>1</b>                     | -17.3829  |
| P52209     | 6-phosphogluconate dehydrogenase, decarboxylating                        | PGD      | <b>2</b>       | -3.5218   | <b>1</b>                     | -10.0906  |
| P84157     | Matrix-remodeling-associated protein 7                                   | MXRA7    | <b>2</b>       | -4.9994   | <b>1</b>                     | -19.5041  |
| O95834     | Echinoderm microtubule-associated protein-like 2                         | EML2     | <b>1</b>       | 2.4512    | <b>1</b>                     | 3.3472    |
| P14174     | Macrophage migration inhibitory factor                                   | MIF      | <b>1</b>       | -2.0485   | <b>1</b>                     | -3.4632   |

|        |                                    |       |   |         |   |         |
|--------|------------------------------------|-------|---|---------|---|---------|
| P21926 | CD9 antigen                        | CD9   | 1 | -0.8408 | 1 | -1.0123 |
| P28482 | Mitogen-activated protein kinase 1 | MAPK1 | 1 | 3.6737  | 1 | 4.5044  |
| P43652 | Afamin                             | AFM   | 1 | 2.9634  | 1 | 3.4717  |

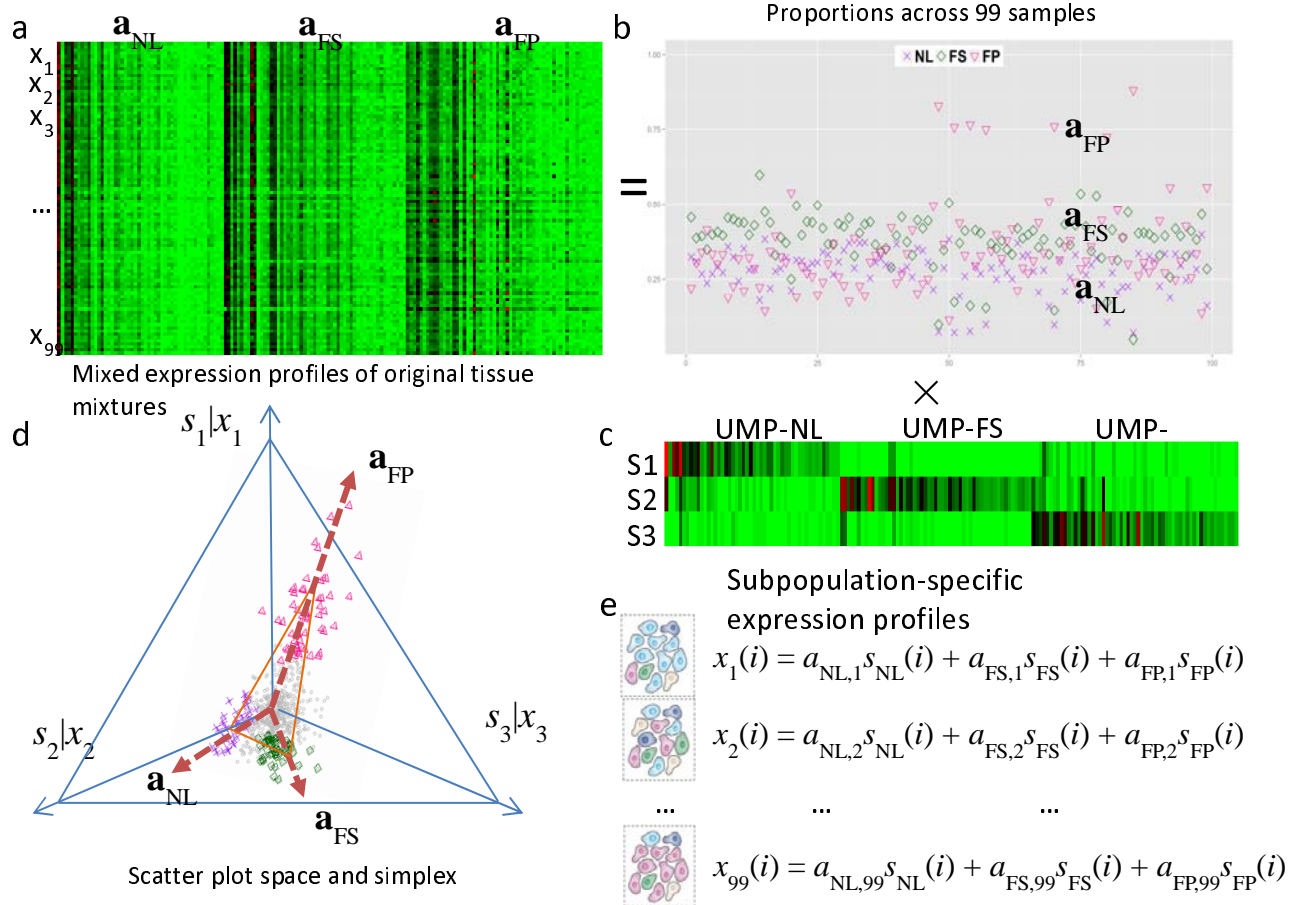

**Supplementary Figure 6 Convex Analysis of Mixtures of AA Protein Data.** a. Heatmap of mixed expressions of upregulated marker proteins (UMP) in 99 AA samples. b. Estimated proportions of NL, FS, and FP across 99 AA samples. Note: The AA data only supported identification of three vertices compared with four vertices in the LAD data. c. Heatmap of subpopulation-specific expressions of upregulated marker proteins. d. Geometry of the mixing operation in scatter space that produces a compressed and rotated scatter simplex whose vertices host subpopulation-specific upregulated marker proteins and correspond to mixing proportions. e. Mathematical description on the protein expression readout of multiple distinct subpopulations.

**Supplemental Figure 7. Convex Analysis of Mixtures (CAM) Identified Upregulated Fibrous Plaque Marker Proteins for LAD (n=99) and AA (n=99) Samples.**

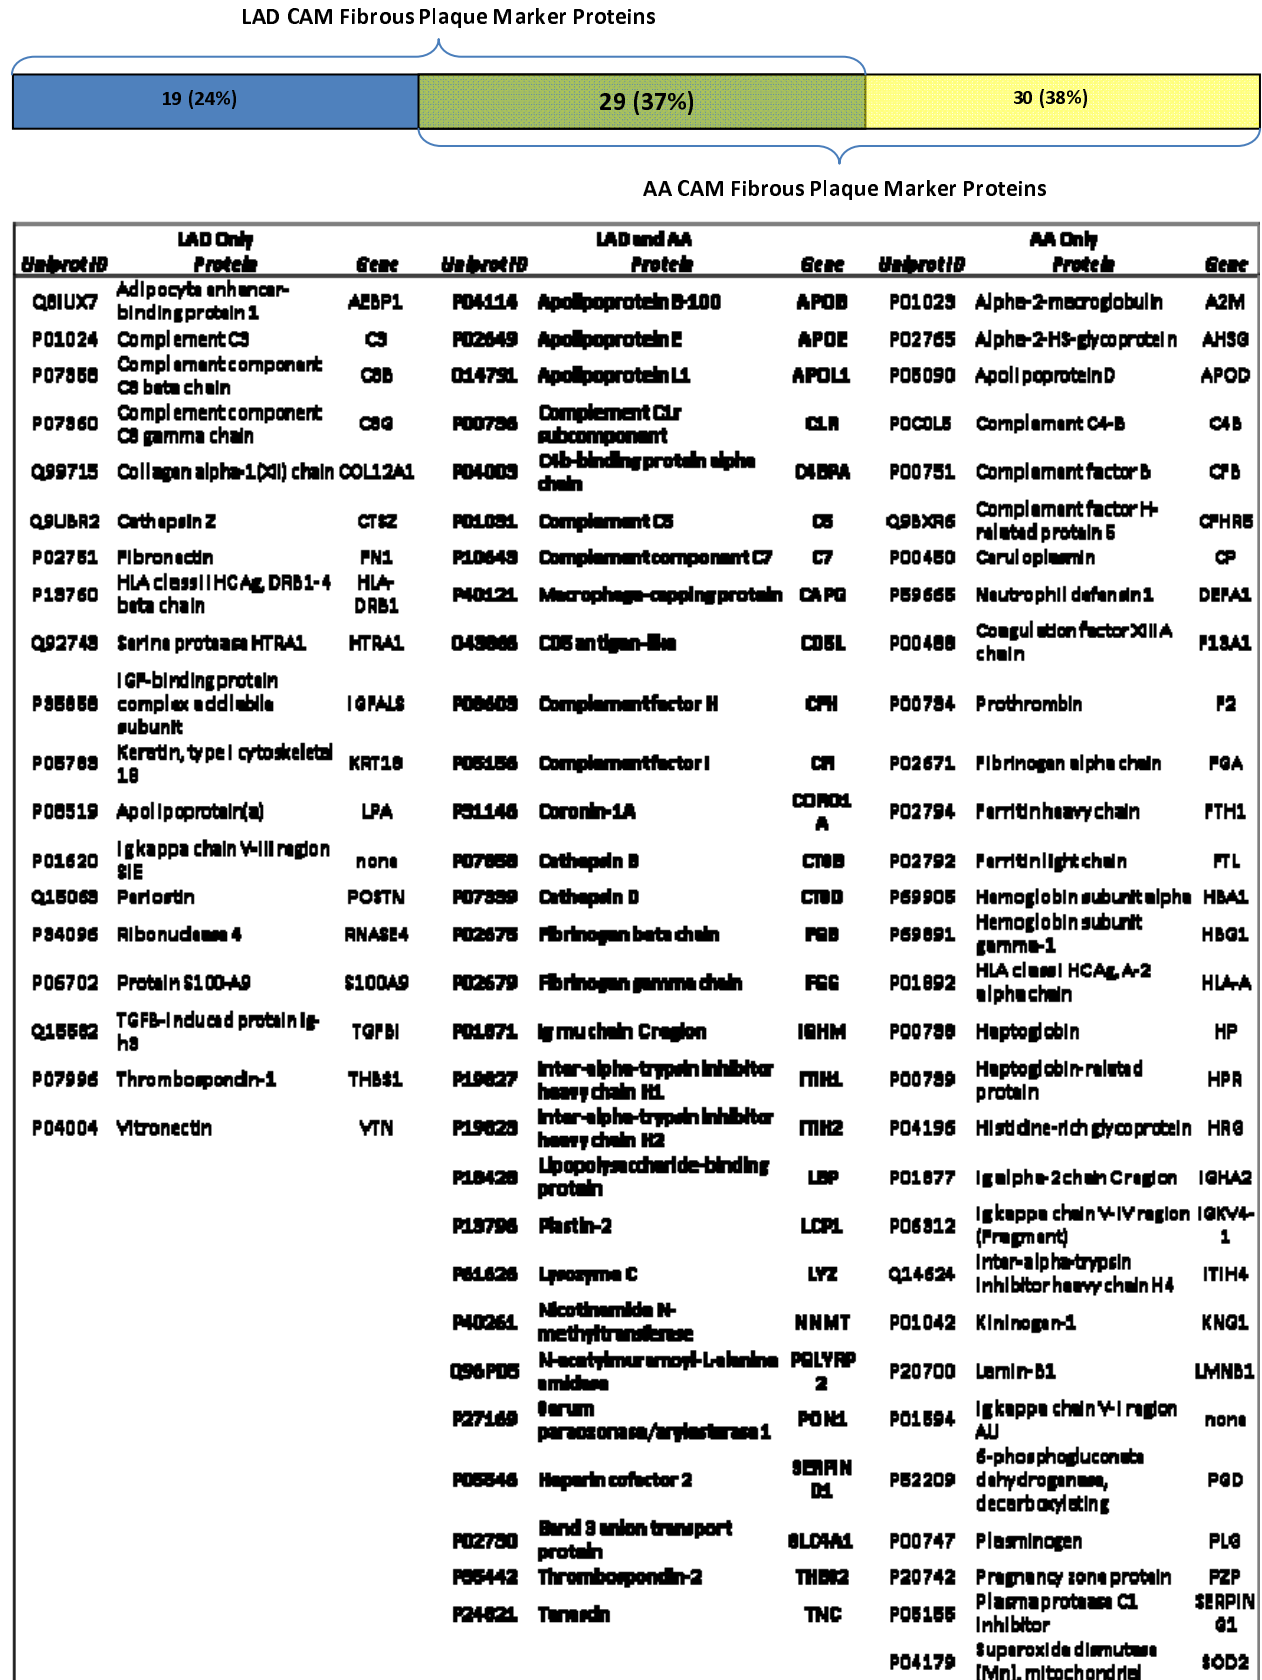



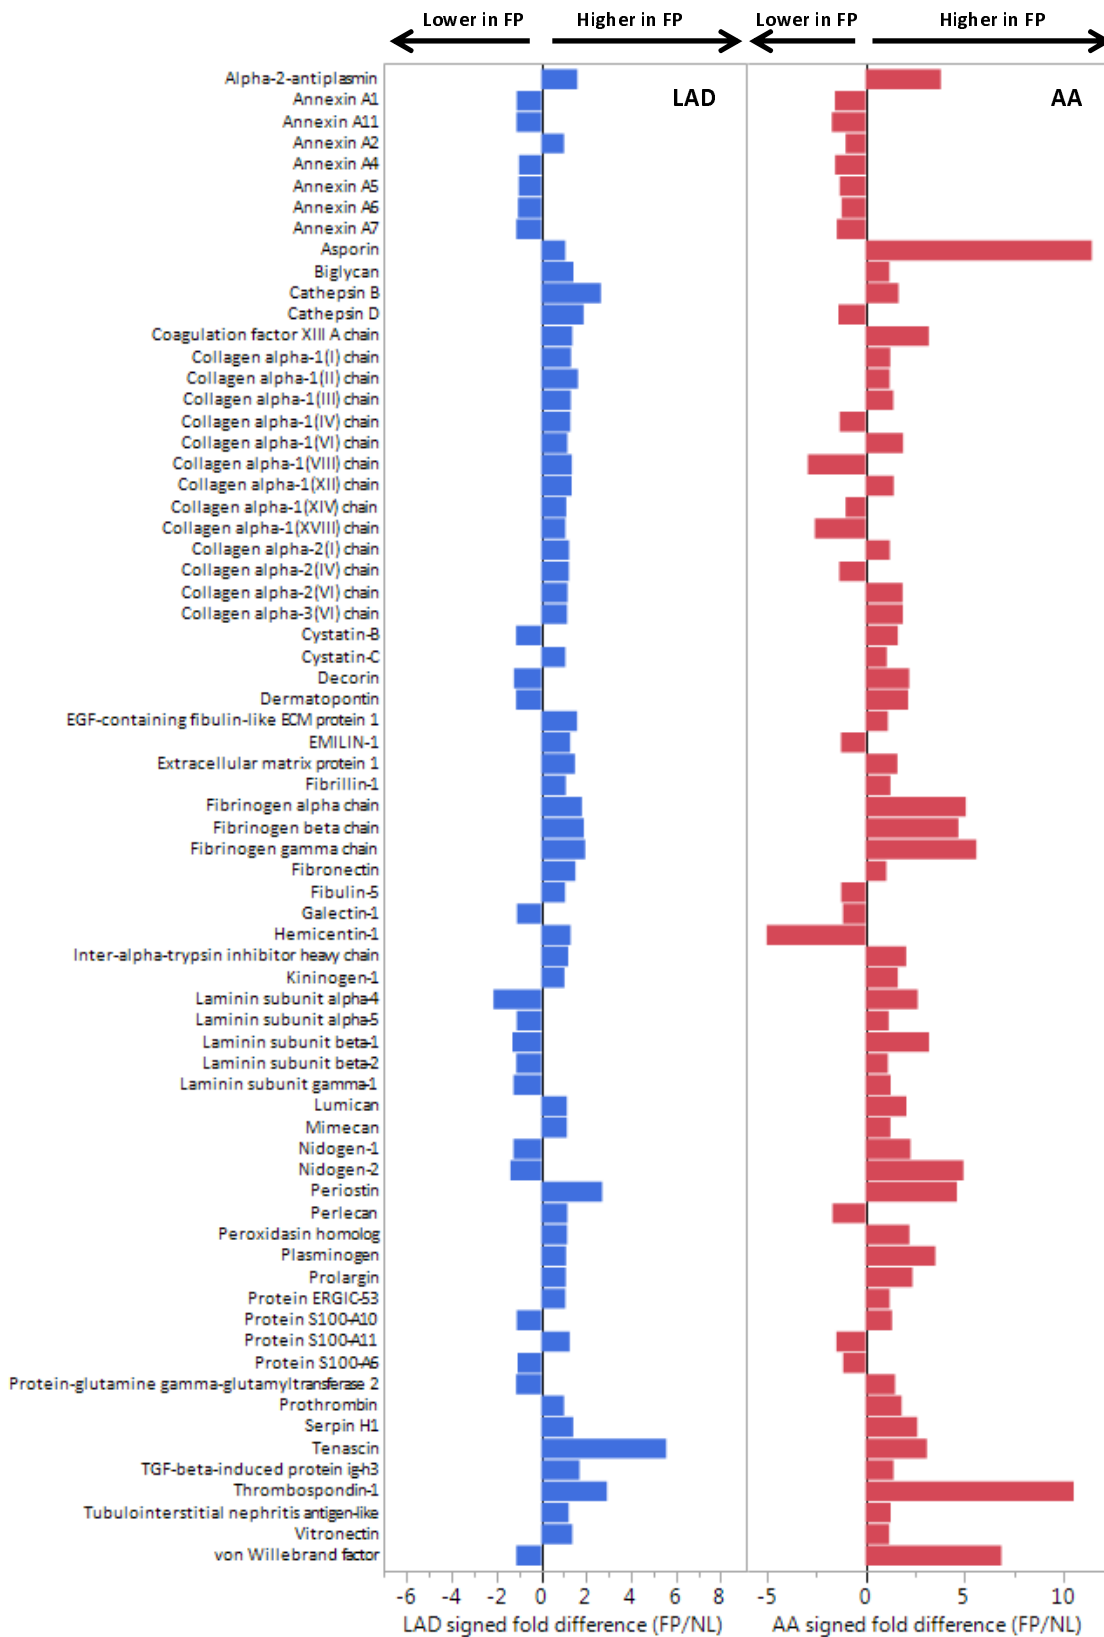

**Supplemental Figure 8. Comparison of Extracellular Matrix Proteins in FP vs NL Samples in LAD and AA Samples Data**  
independent acquisition (SWATH) analysis was used to compare a targeted set of mitochondrial proteins in LAD (FP n=15; NL n=30) and AA (FP n=9; NL n=18) samples after adjustment for age, sex, MYH11, RABA7A, TERA, G6PI. Histogram bars indicate relative difference between FP and NL samples in each anatomic location. LAD Mean FP/NL = 1.25, MANOVA p-value = 0.02; AA Mean FP/NL = 1.78, p-value = 0.017



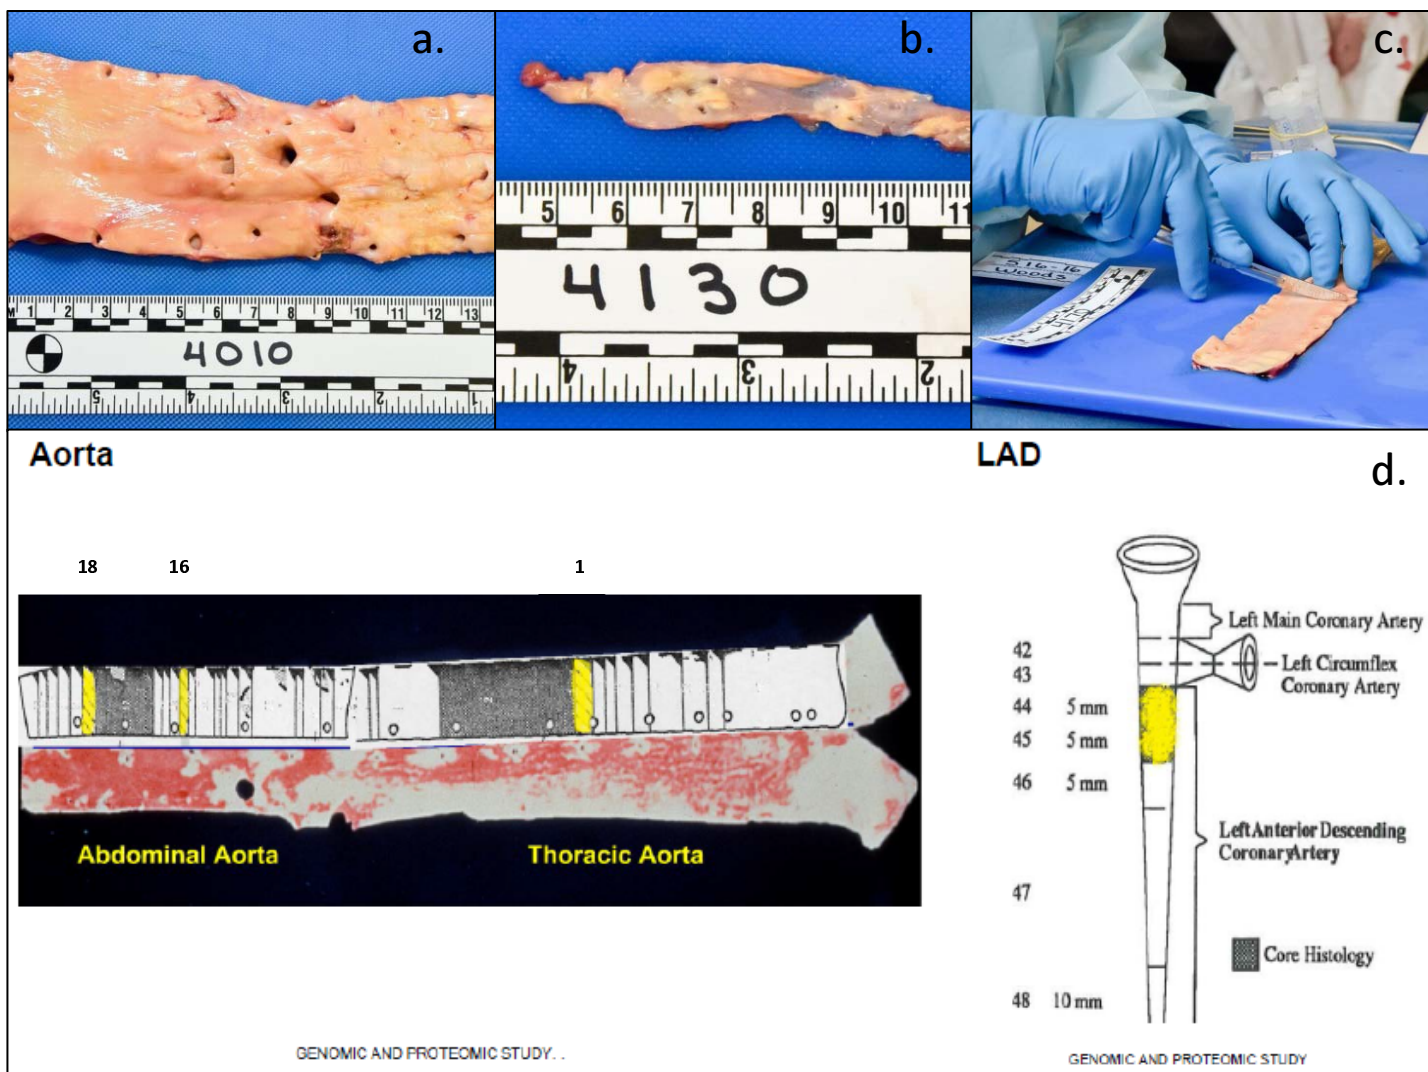

**Supplemental Figure 9. Arterial Sample Acquisition:** a.) distal aorta; b.) left anterior descending (LAD) coronary artery; c.) collection of a gram of tissue from the distal aortic specimen; d.) Standardized locations for sample collection. Specimens were obtained from Sections 1, 16, 18, 44 and 45 (indicated in yellow) for all autopsies. These locations correspond to locations originally established and used for the Pathobiological Determinants of Atherosclerosis in Youth study<sup>29</sup>.

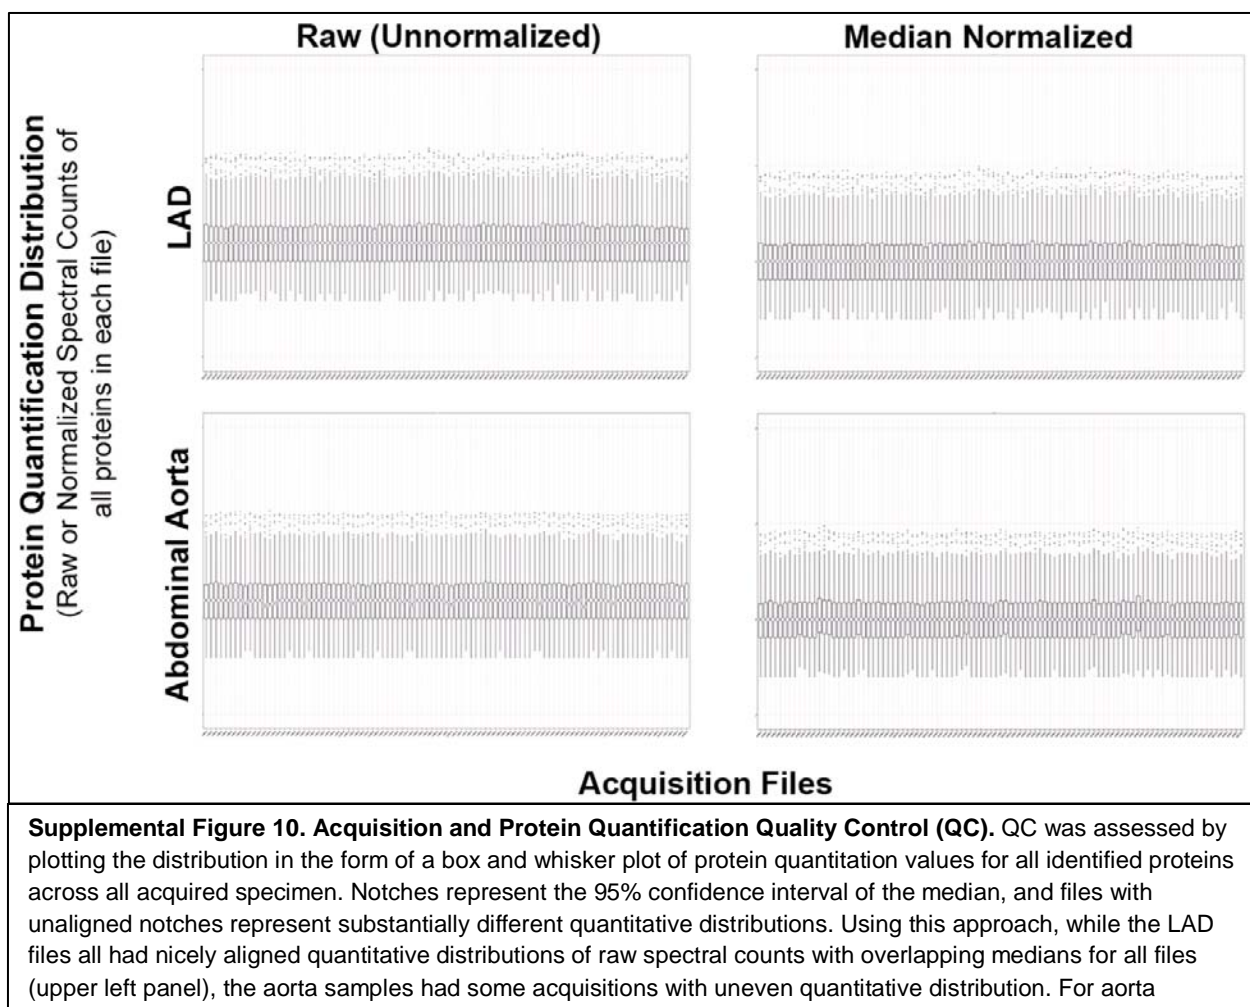

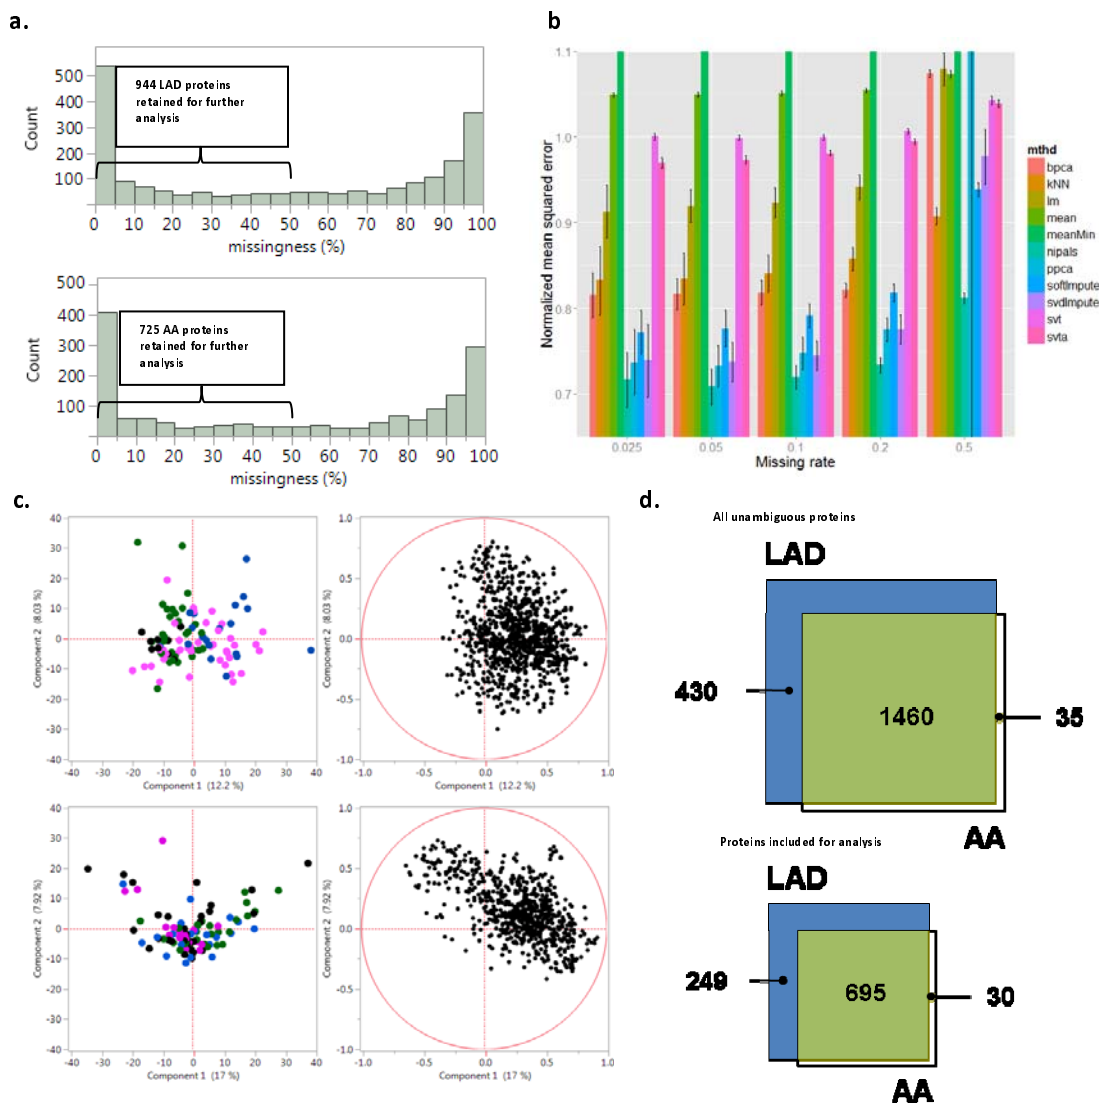

**Supplemental Figure 11. Data missingness, imputation, batch effects and anatomic overlap. a.)** Distribution of missingness for the LAD and AA data. The most common value for missingness was 0% in both the LAD and AA. However, there was a range of missingness including some unambiguously identified protein groups that were only present in a minority of samples. Missingness encoded models did not identify any proteins with >50% missingness that were significantly associated with disease status. **b.)** Using proteins with complete data (0% missingness) data sets simulating various rates (2.5%-50.0%), and types (random, inversely proportional with mean signal intensity) of missingness were used to test 11 different matrix completion methods. Based on the low normalized mean squared error, the NPIALS method was selected for imputation. **c.)** PCA analysis with color encoding for different protein extraction batches did not identify important batch effects or extreme outliers. **d.)** Proportional Venn diagrams indicating the overlap in identified and analyzed proteins in the LAD and AA territories.

## REFERENCES

1. Hanzawa, H., *et al.* Combined Plasma and Tissue Proteomic Study of Atherogenic Model Mouse: Approach To Elucidate Molecular Determinants in Atherosclerosis Development. *Journal of proteome research* **14**, 4257-4269 (2015).
2. Jing, L., *et al.* Discovery of biomarker candidates for coronary artery disease from an APOE-knock out mouse model using iTRAQ-based multiplex quantitative proteomics. *Proteomics* **11**, 2763-2776 (2011).
3. Mayr, M., *et al.* Proteomic and metabolomic analyses of atherosclerotic vessels from apolipoprotein E-deficient mice reveal alterations in inflammation, oxidative stress, and energy metabolism. *Arteriosclerosis, thrombosis, and vascular biology* **25**, 2135-2142 (2005).
4. Fach, E.M., *et al.* In vitro biomarker discovery for atherosclerosis by proteomics. *Molecular & cellular proteomics : MCP* **3**, 1200-1210 (2004).
5. Conway, J.P. & Kinter, M. Proteomic and transcriptomic analyses of macrophages with an increased resistance to oxidized low density lipoprotein (oxLDL)-induced cytotoxicity generated by chronic exposure to oxLDL. *Molecular & cellular proteomics : MCP* **4**, 1522-1540 (2005).
6. Olson, F.J., *et al.* Consistent differences in protein distribution along the longitudinal axis in symptomatic carotid atherosclerotic plaques. *Biochemical and biophysical research communications* **401**, 574-580 (2010).
7. Liang, W., *et al.* Distinctive proteomic profiles among different regions of human carotid plaques in men and women. *Scientific reports* **6**, 26231 (2016).
8. Didangelos, A., *et al.* Extracellular matrix composition and remodeling in human abdominal aortic aneurysms: a proteomics approach. *Molecular & cellular proteomics : MCP* **10**, M111.008128 (2011).
9. Porcelli, B., *et al.* Proteomic analysis of atherosclerotic plaque. *Biomedicine & pharmacotherapy = Biomedecine & pharmacotherapie* **64**, 369-372 (2010).
10. Lepedda, A.J., *et al.* A proteomic approach to differentiate histologically classified stable and unstable plaques from human carotid arteries. *Atherosclerosis* **203**, 112-118 (2009).
11. de la Cuesta, F., *et al.* A proteomic focus on the alterations occurring at the human atherosclerotic coronary intima. *Molecular & cellular proteomics : MCP* **10**, M110.003517 (2011).
12. Bagnato, C., *et al.* Proteomics analysis of human coronary atherosclerotic plaque: a feasibility study of direct tissue proteomics by liquid chromatography and tandem mass spectrometry. *Molecular & cellular proteomics : MCP* **6**, 1088-1102 (2007).
13. Didangelos, A., *et al.* Proteomics characterization of extracellular space components in the human aorta. *Molecular & cellular proteomics : MCP* **9**, 2048-2062 (2010).
14. Mayr, M., *et al.* Proteomics, metabolomics, and immunomics on microparticles derived from human atherosclerotic plaques. *Circulation. Cardiovascular genetics* **2**, 379-388 (2009).

15. Viiri, L.E., *et al.* Smooth muscle cells in human atherosclerosis: proteomic profiling reveals differences in expression of Annexin A1 and mitochondrial proteins in carotid disease. *Journal of molecular and cellular cardiology* **54**, 65-72 (2013).
16. Fredman, G., *et al.* An imbalance between specialized pro-resolving lipid mediators and pro-inflammatory leukotrienes promotes instability of atherosclerotic plaques. *Nature communications* **7**, 12859 (2016).
17. Preil, S.A., *et al.* Quantitative Proteome Analysis Reveals Increased Content of Basement Membrane Proteins in Arteries From Patients With Type 2 Diabetes Mellitus and Lower Levels Among Metformin Users. *Circulation. Cardiovascular genetics* **8**, 727-735 (2015).
18. Maleki, S., *et al.* Mesenchymal state of intimal cells may explain higher propensity to ascending aortic aneurysm in bicuspid aortic valves. *Scientific reports* **6**, 35712 (2016).
19. Gene Ontology Consortium: going forward. *Nucleic acids research* **43**, D1049-1056 (2015).
20. Carter, S.L., Brechbuhler, C.M., Griffin, M. & Bond, A.T. Gene co-expression network topology provides a framework for molecular characterization of cellular state. *Bioinformatics (Oxford, England)* **20**, 2242-2250 (2004).
21. Jeong, H., Tombor, B., Albert, R., Oltvai, Z.N. & Barabasi, A.L. The large-scale organization of metabolic networks. *Nature* **407**, 651-654 (2000).
22. Bergmann, S., Ihmels, J. & Barkai, N. Similarities and differences in genome-wide expression data of six organisms. *PLoS biology* **2**, E9 (2004).
23. Mitchell, M. *Complexity: A Guided Tour*, (Oxford University Press, New York, New York, 2009).
24. Gao, J., Barzel, B. & Barabasi, A.L. Universal resilience patterns in complex networks. *Nature* **536**, 238 (2016).
25. Creixell, P., Schoof, E.M., Erler, J.T. & Linding, R. Navigating cancer network attractors for tumor-specific therapy. *Nature biotechnology* **30**, 842-848 (2012).
26. Mitra, K., Carvunis, A.R., Ramesh, S.K. & Ideker, T. Integrative approaches for finding modular structure in biological networks. *Nature reviews. Genetics* **14**, 719-732 (2013).
27. Ideker, T. & Krogan, N.J. Differential network biology. *Molecular systems biology* **8**, 565 (2012).
28. Boccaletti, S., Latora, V., Moreno, Y., Chavez, M. & Hwang, D. Complex Networks: Structure and Dynamics *Physics Reports* **424**, 175-308 (2006).
29. Mercer, J.R., *et al.* DNA damage links mitochondrial dysfunction to atherosclerosis and the metabolic syndrome. *Circulation research* **107**, 1021-1031 (2010).
30. Sergin, I., *et al.* Exploiting macrophage autophagy-lysosomal biogenesis as a therapy for atherosclerosis. *Nature communications* **8**, 15750 (2017).
31. Chen, Q., Smith, C.Y., Bailey, K.R., Wennberg, P.W. & Kullo, I.J. Disease location is associated with survival in patients with peripheral arterial disease. *Journal of the American Heart Association* **2**, e000304 (2013).
32. Kullo, I.J. & Leeper, N.J. The genetic basis of peripheral arterial disease: current knowledge, challenges, and future directions. *Circulation research* **116**, 1551-1560 (2015).



33. Hansson, G.K. Inflammation, atherosclerosis, and coronary artery disease. *The New England journal of medicine* **352**, 1685-1695 (2005).
34. Tabas, I. The role of endoplasmic reticulum stress in the progression of atherosclerosis. *Circulation research* **107**, 839-850 (2010).
35. Strong, J.P., *et al.* Prevalence and extent of atherosclerosis in adolescents and young adults: implications for prevention from the Pathobiological Determinants of Atherosclerosis in Youth Study. *Jama* **281**, 727-735 (1999).
36. Chambers, M.C., *et al.* A cross-platform toolkit for mass spectrometry and proteomics. *Nature biotechnology* **30**, 918-920 (2012).
37. Craig, R. & Beavis, R.C. TANDEM: matching proteins with tandem mass spectra. *Bioinformatics (Oxford, England)* **20**, 1466-1467 (2004).
38. Geer, L.Y., *et al.* Open mass spectrometry search algorithm. *Journal of proteome research* **3**, 958-964 (2004).
39. Elias, J.E. & Gygi, S.P. Target-decoy search strategy for increased confidence in large-scale protein identifications by mass spectrometry. *Nature methods* **4**, 207-214 (2007).
40. Apweiler, R., *et al.* UniProt: the Universal Protein knowledgebase. *Nucleic acids research* **32**, D115-119 (2004).
41. Keller, A., Eng, J., Zhang, N., Li, X.J. & Aebersold, R. A uniform proteomics MS/MS analysis platform utilizing open XML file formats. *Molecular systems biology* **1**, 2005.0017 (2005).
42. Keller, A., Nesvizhskii, A.I., Kolker, E. & Aebersold, R. Empirical statistical model to estimate the accuracy of peptide identifications made by MS/MS and database search. *Analytical chemistry* **74**, 5383-5392 (2002).
43. Shteynberg, D., *et al.* iProphet: multi-level integrative analysis of shotgun proteomic data improves peptide and protein identification rates and error estimates. *Molecular & cellular proteomics : MCP* **10**, M111.007690 (2011).
44. Nesvizhskii, A.I., Keller, A., Kolker, E. & Aebersold, R. A statistical model for identifying proteins by tandem mass spectrometry. *Analytical chemistry* **75**, 4646-4658 (2003).
45. Vogel, C. & Marcotte, E.M. Label-free protein quantitation using weighted spectral counting. *Methods in molecular biology (Clifton, N.J.)* **893**, 321-341 (2012).
46. Vizcaino, J.A., *et al.* The PRoteomics IDentifications (PRIDE) database and associated tools: status in 2013. *Nucleic acids research* **41**, D1063-1069 (2013).
47. Candès, E. & Recht, B. Exact Matrix Completion via Convex Optimization. *Foundations of Computational mathematics* **9.6**, 717-772 (2009).
48. Zhang, B. & Horvath, S. A general framework for weighted gene co-expression network analysis. *Statistical applications in genetics and molecular biology* **4**, Article17 (2005).
49. Buettner, F., *et al.* Computational analysis of cell-to-cell heterogeneity in single-cell RNA-sequencing data reveals hidden subpopulations of cells. *Nature biotechnology* **33**, 155-160 (2015).

50. Lake, B.B., *et al.* Neuronal subtypes and diversity revealed by single-nucleus RNA sequencing of the human brain. *Science (New York, N.Y.)* **352**, 1586-1590 (2016).
51. Guintivano, J., Aryee, M.J. & Kaminsky, Z.A. A cell epigenotype specific model for the correction of brain cellular heterogeneity bias and its application to age, brain region and major depression. *Epigenetics* **8**, 290-302 (2013).
52. Kuhn, A., Thu, D., Waldvogel, H.J., Faull, R.L. & Luthi-Carter, R. Population-specific expression analysis (PSEA) reveals molecular changes in diseased brain. *Nature methods* **8**, 945-947 (2011).
53. Rahmani, E., *et al.* Sparse PCA corrects for cell type heterogeneity in epigenome-wide association studies. *Nature methods* **13**, 443-445 (2016).
54. Chan, T., Ma, W., Chi, C. & Wang, Y. A convex analysis framework for blind separation of non-negative sources. *IEEE Trans Signal Processing* **56**, 5120-5134 (2008).
55. Wang, N., *et al.* Mathematical modelling of transcriptional heterogeneity identifies novel markers and subpopulations in complex tissues. *Scientific reports* **6**, 18909 (2016).
56. Chen, L., *et al.* CAM-CM: a signal deconvolution tool for in vivo dynamic contrast-enhanced imaging of complex tissues. *Bioinformatics (Oxford, England)* **27**, 2607-2609 (2011).
57. Chen, L., *et al.* Tissue-specific compartmental analysis for dynamic contrast-enhanced MR imaging of complex tumors. *IEEE transactions on medical imaging* **30**, 2044-2058 (2011).
58. Frey, B.J. & Dueck, D. Clustering by passing messages between data points. *Science (New York, N.Y.)* **315**, 972-976 (2007).
59. Boyle, E.I., *et al.* GO::TermFinder--open source software for accessing Gene Ontology information and finding significantly enriched Gene Ontology terms associated with a list of genes. *Bioinformatics (Oxford, England)* **20**, 3710-3715 (2004).
60. Supek, F., Bosnjak, M., Skunca, N. & Smuc, T. REVIGO summarizes and visualizes long lists of gene ontology terms. *PloS one* **6**, e21800 (2011).
61. Hu, J.X., Thomas, C.E. & Brunak, S. Network biology concepts in complex disease comorbidities. *Nature reviews. Genetics* **17**, 615-629 (2016).
62. Hudson, N.J., Dalrymple, B.P. & Reverter, A. Beyond differential expression: the quest for causal mutations and effector molecules. *BMC genomics* **13**, 356 (2012).
63. Zhang, B., *et al.* DDN: a caBIG(R) analytical tool for differential network analysis. *Bioinformatics (Oxford, England)* **27**, 1036-1038 (2011).
64. Tian, Y., *et al.* Knowledge-fused differential dependency network models for detecting significant rewiring in biological networks. *BMC systems biology* **8**, 87 (2014).
65. Tian, Y., *et al.* KDDN: an open-source Cytoscape app for constructing differential dependency networks with significant rewiring. *Bioinformatics (Oxford, England)* **31**, 287-289 (2015).
